# Supplementary material for: A Summary of Two Decades of QTL and Candidate Genes That Control Seed Tocopherol Contents in Maize (Zea mays L.)
Source: MDPI journal article supplement (doi:10.3390/genes15040472), 2024-04-09
Supplement: s1 [file s1]

### **Supplementary Data.**

**Table S1.** Details of QTL that control seed  $\alpha$ -tocopherol ( $\alpha$ -Toc),  $\gamma$ -tocopherol ( $\gamma$ -Toc),  $\delta$ -tocopherol ( $\delta$ -Toc), total tocopherol (T-Toc) contents and ( $\alpha/\gamma$ )-Toc ratio in maize from 2002 to 2022. Candidate genes identified with these QTL regions are also shown.

**Figure S1.** Chromosome locations of QTL that control seed  $\alpha$ -tocopherol ( $\alpha$ -Toc),  $\gamma$ -tocopherol ( $\gamma$ -Toc),  $\delta$ -tocopherol ( $\delta$ -Toc), total tocopherol (T-Toc) contents and ( $\alpha/\gamma$ )-Toc ratio in maize from 2002 to 2022.

**Table S1.** Details of QTL that control seed  $\alpha$ -tocopherol ( $\alpha$ -Toc),  $\gamma$ -tocopherol ( $\gamma$ -Toc),  $\delta$ -tocopherol ( $\delta$ -Toc), total tocopherol (T-Toc) contents and ( $\alpha/\gamma$ )-Toc ratio in maize from 2002 to 2022. Candidate genes identified with these QTL regions are also shown.

| Trait                                                                       | QTL                                           | Chr. | Marker / Interval     | Position (cM) | LOD/P | R <sup>2</sup> (%) | Candid. Gene/Product | Environment | Reference                 |
|-----------------------------------------------------------------------------|-----------------------------------------------|------|-----------------------|---------------|-------|--------------------|----------------------|-------------|---------------------------|
| $\alpha$ -Toc & $\gamma$ -Toc                                               | <i>qa-Toc-1 q<math>\gamma</math>-Toc-1</i>    | 1    | p-umc1073-p-phi109275 | 81.9-118.4    | *     | *                  | *                    | IL, USA     | (Rochefford et al., 2002) |
|                                                                             | <i>qa-Toc-2 q<math>\gamma</math>-Toc-2</i>    |      | p-umc2237-p-umc1245   | 216.3-258.2   | *     | *                  | *                    | IL, USA     |                           |
|                                                                             | <i>qa-Toc-3 q<math>\gamma</math>-Toc-3</i>    | 4    | p-umc1808-p-umc2188   | 162.1-181.7   | *     | *                  | *                    | IL, USA     |                           |
|                                                                             | <i>qa-Toc-4 q<math>\gamma</math>-Toc-4</i>    | 5    | p-umc0081-p-umc2304   | 133.8-141.3   | *     | *                  | *                    | IL, USA     |                           |
|                                                                             | <i>qa-Toc-5 q<math>\gamma</math>-Toc-5</i>    |      | p-umc1019-p-phi085    | 162.8-193.9   | *     | *                  | *                    | IL, USA     |                           |
|                                                                             | <i>qa-Toc-6 q<math>\gamma</math>-Toc-6</i>    |      | p-phi085-p-phi048     | 193.9-194.4   | *     | *                  | *                    | IL, USA     |                           |
|                                                                             | <i>qa-Toc-7 q<math>\gamma</math>-Toc-7</i>    | 6    | p-umc1006-p-bnlg2191  | 24.4-27.2     | *     | *                  | *                    | IL, USA     |                           |
|                                                                             | <i>qa-Toc-8 q<math>\gamma</math>-Toc-8</i>    | 7    | p-umc1713-p-umc1301   | 107.8-144.5   | *     | *                  | *                    | IL, USA     |                           |
| <b>QTL Identified in (W64a X A632) RIL population (n=200)</b>               |                                               |      |                       |               |       |                    |                      |             | (Wong et al., 2003)       |
| $\alpha$ -Toc                                                               | <i>qa-Toc-1</i>                               | 5    | mmc0081-umc1155       | 51.0-53.0     | 4.2   | 2.9                | *                    | IL, USA     |                           |
|                                                                             | <i>qa-Toc-2</i>                               |      | umc1155-phi085        | 89.0-91.0     | 13.9  | 19.6               | *                    | IL, USA     |                           |
|                                                                             | <i>qa-Toc-3</i>                               | 6    | umc21-bmc1154         | 93.0-95.0     | 3.6   | 2.5                | *                    | IL, USA     |                           |
|                                                                             | <i>qa-Toc-4</i>                               | 8    | phi115-bmc1176        | 63.0-65.0     | 3.1   | 2.7                | *                    | IL, USA     |                           |
| $\delta$ -Toc                                                               | <i>q<math>\delta</math>-Toc-1</i>             | 1    | bmc1016-dupssr026     | 145.0-147.0   | 3.9   | 2.8                | *                    | IL, USA     |                           |
|                                                                             | <i>q<math>\delta</math>-Toc-2</i>             | 5    | mmc0081-umc1155       | 55.0-57.0     | 5.3   | 9.0                | *                    | IL, USA     |                           |
|                                                                             | <i>q<math>\delta</math>-Toc-3</i>             | 8    | umc1149-mmc0181       | 97.0-99.0     | 3.1   | 5.3                | *                    | IL, USA     |                           |
| $\gamma$ -Toc                                                               | <i>q<math>\gamma</math>-Toc-1</i>             | 1    | bmc1016-dupssr026     | 141.0-143.0   | 3.2   | 5.4                | *                    | IL, USA     |                           |
|                                                                             | <i>q<math>\gamma</math>-Toc-2</i>             | 2    | dupssr21-umc1156      | 59.0-61.0     | 3.2   | 3.2                | *                    | IL, USA     |                           |
|                                                                             | <i>q<math>\gamma</math>-Toc-3</i>             | 5    | phi113-dupssr010      | 19.0-21.0     | 8.7   | 23.6               | *                    | IL, USA     |                           |
|                                                                             | <i>q<math>\gamma</math>-Toc-4</i>             | 7    | bmc1305-dupssr009     | 111.0-113     | 4.4   | 7.7                | *                    | IL, USA     |                           |
| <b>Total-Toc</b>                                                            | <i>qT-Toc-1</i>                               | 5    | phi113-dupssr010      | 15.0-17.0     | 7.4   | 10.9               | *                    | IL, USA     |                           |
| <b>(<math>\alpha/\gamma</math>)-Toc Ratio</b>                               | <i>q(<math>\alpha/\gamma</math>)-Toc-1</i>    | 5    | umc1155-phi085        | 91.0-93.0     | 9.4   | 33.0               | *                    | IL, USA     |                           |
| <b>QTL Identified in (W64a X A632) X AE335 Testcross population (n=185)</b> |                                               |      |                       |               |       |                    |                      |             |                           |
| $\alpha$ -Toc                                                               | <i>qa-Toc-1</i>                               | 3    | phi046-bnlg197        | 221.0-223.0   | 4.3   | 3.5                | *                    | IL, USA     |                           |
|                                                                             | <i>qa-Toc-2</i>                               | 5    | mmc0081-umc1155       | 51.0-53.0     | 7.7   | 2.3                | *                    | IL, USA     |                           |
|                                                                             | <i>qa-Toc-3</i>                               |      | umc1155-phi085        | 79.0-81.0     | 6.4   | 0.4                | *                    | IL, USA     |                           |
|                                                                             | <i>qa-Toc-4</i>                               |      | phi085-bmc1346        | 101.0-103.0   | 12.3  | 4.7                | *                    | IL, USA     |                           |
|                                                                             | <i>qa-Toc-5</i>                               | 6    | dupssr015-bmc1136     | 191.0-193.0   | 4.0   | 4.2                | *                    | IL, USA     |                           |
| $\delta$ -Toc                                                               | <i>q<math>\delta</math>-Toc-1</i>             | 5    | umc1155-phi085        | 65.0-67.0     | 3.5   | 8.8                | *                    | IL, USA     |                           |
|                                                                             | $\gamma$ -Toc                                 |      |                       |               |       |                    |                      |             |                           |
| $\gamma$ -Toc                                                               | <i>q<math>\gamma</math>-Toc-1</i>             | 5    | dupssr010-umc1221     | 35.0-37.0     | 5.3   | 4.0                | *                    | IL, USA     |                           |
|                                                                             | <i>q<math>\gamma</math>-Toc-2</i>             |      | umc1155-phi085        | 83.0-85.0     | 3.9   | 7.5                | *                    | IL, USA     |                           |
|                                                                             | <i>q<math>\gamma</math>-Toc-3</i>             | 7    | bmc1305-dupssr009     | 111.0-113.0   | 6.6   | 11.1               | *                    | IL, USA     |                           |
| <b>Total-Toc</b>                                                            | <i>qT-Toc-1</i>                               | 5    | dupssr010-umc1221     | 37.0-39.0     | 3.7   | 6.4                | *                    | IL, USA     |                           |
|                                                                             | <i>qT-Toc-2</i>                               | 7    | zdsRFLP-phi034        | 81.0-83.0     | 3.3   | 5.1                | *                    | IL, USA     |                           |
|                                                                             | <b>(<math>\alpha/\gamma</math>)-Toc Ratio</b> |      |                       |               |       |                    |                      |             |                           |
|                                                                             | <i>q(<math>\alpha/\gamma</math>)-Toc-1</i>    | 5    | mmc0081-umc1155       | 51.0-53.0     | 8.0   | 12.8               | *                    | IL, USA     |                           |
|                                                                             | <i>q(<math>\alpha/\gamma</math>)-Toc-2</i>    |      | umc1155-phi085        | 91.0-93.0     | 16.8  | 30.5               | *                    | IL, USA     |                           |
| $\alpha$ -Toc                                                               | <i>qa-Toc-1</i>                               | 1    | umc1598-bnlg1811      | 79-94         | 8.3   | 15.5               | *                    | China       | (Chander et al., 2008)    |
|                                                                             | <i>qa-Toc-2</i>                               | 1    | umc1725-phi064        | 273-280       | 3.2   | 4.6                | *                    | China       |                           |
|                                                                             | <i>qa-Toc-3</i>                               | 2    | P3VTE5-umc1265        | 3-19          | 3.1   | 5.3                | <i>P3VTE5</i>        | China       |                           |
|                                                                             | <i>qa-Toc-4</i>                               | 5    | bnlg1237-VTE4-phi085  | 130-140       | 7.9   | 13.8               | <i>VTE4</i>          | China       |                           |
|                                                                             | <i>qa-Toc-5</i>                               | 8    | umc1075-umc1304       | 17-33         | 6.1   | 7.9                | *                    | China       |                           |
|                                                                             | <i>qa-Toc-6</i>                               | 9    | phi065-umc1258        | 33-44         | 6.3   | 9.6                | *                    | China       |                           |
|                                                                             | <i>qa-Toc-7</i>                               | 10   | phi118-umc2053        | 0-5           | 4.3   | 5.4                | *                    | China       |                           |
| $\delta$ -Toc                                                               | <i>q<math>\delta</math>-Toc-1</i>             | 6    | umc1195-Y1ssr-umc1595 | 28-38         | 6.6   | 9.6                | <i>PSY1</i>          | China       |                           |
|                                                                             | <i>q<math>\delta</math>-Toc-2</i>             | 7    | mmc0171-VTE3          | 30-40         | 5.7   | 13.5               | <i>VTE3</i>          | China       |                           |
|                                                                             | <i>q<math>\delta</math>-Toc-3</i>             | 7    | bnlg1792-phi091       | 45-54         | 9.0   | 18.4               | *                    | China       |                           |

|                          |                      |   |                      |             |      |      |        |                         |
|--------------------------|----------------------|---|----------------------|-------------|------|------|--------|-------------------------|
| $\gamma$ -Toc            | $q\delta$ -Toc-4     | 8 | umc1075-umc1304      | 10-29       | 3.2  | 11.4 | *      | China                   |
|                          | $q\gamma$ -Toc-1     | 1 | umc1403-phi001       | 57-68       | 5.3  | 9.5  | *      | China                   |
|                          | $q\gamma$ -Toc-2     | 1 | phi001-bnlg1811      | 72-85       | 5.5  | 8.4  | *      | China                   |
|                          | $q\gamma$ -Toc-3     | 2 | P3VTE5-umc1215       | 3-17        | 3.0  | 5.2  | P3VTE5 | China                   |
|                          | $q\gamma$ -Toc-4     | 5 | umc2115-umc1447      | 58-72       | 7.0  | 16.4 | *      | China                   |
|                          | $q\gamma$ -Toc-5     | 5 | umc1692-HPPD         | 76-84       | 4.6  | 7.1  | HPPD   | China                   |
| T-Toc                    | $q\gamma$ -Toc-6     | 5 | bnlg1237-VTE4-phi085 | 131-141     | 4.2  | 5.6  | VTE4   | China                   |
|                          | $q\gamma$ -Toc-7     | 8 | umc1075-umc1304      | 16-31       | 11.2 | 29.3 | *      | China                   |
|                          | $qT$ -Toc-1          | 1 | umc1403-phi001       | 59-69       | 7.0  | 13.7 | *      | China                   |
|                          | $qT$ -Toc-2          | 1 | phi001-umc1598       | 72-86       | 7.7  | 12.3 | *      | China                   |
|                          | $qT$ -Toc-3          | 2 | P3VTE5-umc1215       | 3-16        | 3.4  | 7.0  | P3VTE5 | China                   |
|                          | $qT$ -Toc-4          | 5 | umc2115-umc1447      | 59-73       | 5.6  | 11.7 | *      | China                   |
| (a/ $\gamma$ )-Toc Ratio | $qT$ -Toc-5          | 5 | umc1692-HPPD         | 76-84       | 4.5  | 7.1  | HPPD   | China                   |
|                          | $qT$ -Toc-6          | 8 | umc1075-umc1304      | 12-30       | 14.1 | 33.5 | *      | China                   |
|                          | $qT$ -Toc-7          | 9 | umc1258-umc1688      | 39-45       | 3.0  | 3.6  | *      | China                   |
|                          | $qT$ -Toc-8          | 9 | umc1078-umc1471      | 54-63       | 3.9  | 6.9  | *      | China                   |
|                          | $q(a/\gamma)$ -Toc-1 | 3 | phi053-dupssr23      | 101-111     | 3.0  | 3.3  | *      | China                   |
|                          | $q(a/\gamma)$ -Toc-2 | 5 | umc2115-umc1447      | 59-74       | 6.8  | 9.0  | *      | China                   |
| $\alpha$ -Toc            | $q(a/\gamma)$ -Toc-3 | 5 | umc1692-HPPD         | 75-84       | 6.3  | 9.3  | HPPD   | China                   |
|                          | $q(a/\gamma)$ -Toc-4 | 5 | bnlg1237-VTE4-phi085 | 134-138     | 10.2 | 13.3 | VTE4   | China                   |
|                          | $q(a/\gamma)$ -Toc-5 | 7 | umc1112-umc2332      | 73-86       | 3.2  | 6.7  | *      | China                   |
|                          | $qa$ -Toc-1          | 1 | A/G-41,597           | 3,009,997   | *    | *    | *      | China (Li et al., 2012) |
|                          | $qa$ -Toc-2          | 1 | A/C-54,850           | 3,379,175   | *    | *    | *      | China                   |
|                          | $qa$ -Toc-3          | 1 | A/G-1,213            | 60,212,244  | *    | *    | *      | China                   |
| $\delta$ -Toc            | $qa$ -Toc-4          | 3 | A/T-17,550           | 228,955,373 | *    | *    | *      | China                   |
|                          | $qa$ -Toc-5          | 4 | C/G-18,772           | 65,286,187  | *    | *    | *      | China                   |
|                          | $qa$ -Toc-6          | 4 | A/G-18,773           | 65,286,238  | *    | *    | *      | China                   |
|                          | $qa$ -Toc-7          | 5 | A/G-25,801           | 198,800,752 | *    | *    | ZmVTE4 | China                   |
|                          | $qa$ -Toc-8          | 5 | A/G-25,814           | 199,266,329 | *    | *    | ZmVTE4 | China                   |
|                          | $qa$ -Toc-9          | 5 | T/C-25,815           | 199,442,506 | *    | *    | ZmVTE4 | China                   |
|                          | $qa$ -Toc-10         | 5 | A/G-49,239           | 199,444,812 | *    | *    | ZmVTE4 | China                   |
|                          | $qa$ -Toc-11         | 5 | A/G-25,817           | 199,461,718 | *    | *    | ZmVTE4 | China                   |
|                          | $qa$ -Toc-12         | 5 | A/G-3,462            | 199,528,414 | *    | *    | ZmVTE4 | China                   |
|                          | $qa$ -Toc-13         | 5 | T/C-25,820           | 199,530,006 | *    | *    | ZmVTE4 | China                   |
|                          | $qa$ -Toc-14         | 5 | A/G-25,821           | 199,530,947 | *    | *    | ZmVTE4 | China                   |
|                          | $qa$ -Toc-15         | 5 | A/G-408              | 199,970,863 | *    | *    | ZmVTE4 | China                   |
|                          | $qa$ -Toc-16         | 5 | T/C-53,345           | 200,017,666 | *    | *    | ZmVTE4 | China                   |
|                          | $qa$ -Toc-17         | 5 | T/G-25,826           | 200,023,434 | *    | *    | ZmVTE4 | China                   |
|                          | $qa$ -Toc-18         | 5 | A/G-45,458           | 200,776,518 | *    | *    | ZmVTE4 | China                   |
|                          | $qa$ -Toc-19         | 5 | A/G-51,039           | 201,207,792 | *    | *    | ZmVTE4 | China                   |
|                          | $qa$ -Toc-20         | 5 | T/G-51,038           | 201,211,449 | *    | *    | ZmVTE4 | China                   |
|                          | $qa$ -Toc-21         | 5 | T/C-51,046           | 201,222,026 | *    | *    | ZmVTE4 | China                   |
|                          | $qa$ -Toc-22         | 5 | A/G-51,045           | 201,222,043 | *    | *    | ZmVTE4 | China                   |
|                          | $qa$ -Toc-23         | 5 | A/G-50,039           | 201,276,495 | *    | *    | ZmVTE4 | China                   |
|                          | $qa$ -Toc-24         | 5 | A/G-25,857           | 202,616,083 | *    | *    | ZmVTE4 | China                   |
|                          | $q\delta$ -Toc-1     | 2 | A/G-10,638           | 86,253,631  | *    | *    | *      | China                   |
|                          | $q\delta$ -Toc-2     | 3 | A/G-48,923           | 225,227,814 | *    | *    | *      | China                   |
|                          | $q\delta$ -Toc-3     | 4 | A/G-18,695           | 61,876,947  | *    | *    | *      | China                   |
|                          | $q\delta$ -Toc-4     | 5 | A/G-24,089           | 103,306,223 | *    | *    | *      | China                   |
| $\gamma$ -Toc            | $q\delta$ -Toc-5     | 9 | A/G-2,725            | 94,285,743  | *    | *    | *      | China                   |
|                          | $q\gamma$ -Toc-1     | 1 | T/C-7,874            | 227,897,687 | *    | *    | *      | China                   |

|                                                                      |                 |    |                         |               |      |      |             |                      |
|----------------------------------------------------------------------|-----------------|----|-------------------------|---------------|------|------|-------------|----------------------|
| <b>T-Toc</b>                                                         | <i>qγ-Toc-2</i> | 3  | T/G-51,195              | 213,191,036   | *    | *    | *           | China                |
|                                                                      | <i>qγ-Toc-3</i> | 4  | A/G-18,241              | 34,181,986    | *    | *    | *           | China                |
|                                                                      | <i>qT-Toc-1</i> | 1  | T/C-7,874               | 227,897,687   | *    | *    | *           | China                |
|                                                                      | <i>qT-Toc-2</i> | 2  | A/G-11,758              | 143,273,942   | *    | *    | *           | China                |
|                                                                      | <i>qT-Toc-3</i> | 3  | T/G-51,195              | 213,191,036   | *    | *    | *           | China                |
|                                                                      | <i>qT-Toc-4</i> | 4  | A/G-18,241              | 34,181,986    | *    | *    | *           | China                |
|                                                                      | <i>qT-Toc-5</i> | 5  | A/G-25,291              | 171,214,128   | *    | *    | *           | China                |
|                                                                      | <i>qT-Toc-6</i> | 8  | A/G-32,502              | 22,962,134    | *    | *    | *           | China                |
| <b>QTL Identified in K22 by C17 RIL population (<i>n</i>=237)</b>    |                 |    |                         |               |      |      |             |                      |
|                                                                      |                 |    |                         |               |      |      |             | (Shutu et al., 2012) |
| <b>α-Toc</b>                                                         | <i>qc1-1</i>    | 1  | PHM2130.29-PHM1950.71   | 97.59-104.09  | 4.0  | 3.9  | *           | China                |
|                                                                      | <i>qc5-2</i>    | 5  | PZA01327.1-PZB00869.4   | 62.04-74.57   | 5.3  | 6.2  | *           | China                |
|                                                                      | <i>qc5-1</i>    | 5  | PZA00352.23-PZA02060.1  | 152.75-166.18 | 24.0 | 29.6 | <i>VTE4</i> | China                |
|                                                                      | <i>qc6-2</i>    | 6  | PZA02262.3-PZB01308.2   | 87.7-95.2     | 4.7  | 4.7  | *           | China                |
|                                                                      | <i>qc5-2</i>    | 5  | PZA03226.3-PZA02207.1   | 67.14-79.77   | 4.1  | 6.1  | *           | China                |
|                                                                      | <i>qc5-1</i>    | 5  | PZA00352.23-PZA02060.1  | 152.75-166.18 | 12.3 | 20.1 | <i>VTE4</i> | China                |
|                                                                      | <i>qc1-1</i>    | 1  | PZA00081.18-PZA03189.4  | 85.05-101.69  | 4.1  | 5.5  | *           | China                |
|                                                                      | <i>qc5-2</i>    | 5  | PZA01327.1-PHM16854.3   | 62.04-77.24   | 14.6 | 18.2 | *           | China                |
| <b>γ-Toc</b>                                                         | <i>qc5-1</i>    | 5  | PZA00352.23-PZA02060.1  | 152.75-166.18 | 7.9  | 9.8  | <i>VTE4</i> | China                |
|                                                                      | <i>qc2-1</i>    | 2  | PZB00901.3-PZA03228.4   | 24.02-54.47   | 4.3  | 6.0  | *           | China                |
|                                                                      | <i>qc5-2</i>    | 5  | PZA01327.1-PHM16854.3   | 62.04-77.24   | 11.8 | 17.6 | *           | China                |
|                                                                      | <i>qc5-3</i>    | 5  | PHM3612.19-PHM13639.13  | 196.03-207.23 | 4.0  | 5.2  | *           | China                |
|                                                                      | <i>qc7-1</i>    | 7  | PZA03149.4-PZA02643.1   | 48.86-62.83   | 6.1  | 8.8  | *           | China                |
|                                                                      | <i>qc5-4</i>    | 5  | PZA01371.1-PZA01327.1   | 43.04-62.04   | 5.0  | 11.0 | *           | China                |
|                                                                      | <i>qc5-5</i>    | 5  | PZA00067.10-PZA00148.3  | 109.1-115.8   | 10.2 | 17.3 | *           | China                |
|                                                                      | <i>qc5-2</i>    | 5  | PZA01327.1-PHM16854.3   | 62.04-77.24   | 15.8 | 25.0 | *           | China                |
| <b>T-Toc</b>                                                         | <i>qc5-1</i>    | 5  | PZA03161.1-PZA00545.26  | 144.6-177.68  | 5.5  | 7.8  | <i>TE4</i>  | China                |
|                                                                      | <i>qc6-1</i>    | 6  | PHM15961.13-PZA03069.8  | 7.0-25.9      | 3.8  | 5.3  | *           | China                |
|                                                                      | <i>qc1-1</i>    | 1  | PZA00081.18-PHM1932.51  | 85.05-118.11  | 5.3  | 7.1  | *           | China                |
|                                                                      | <i>qc2-2</i>    | 2  | PHM12952.13-PZB00901.4  | 12.9-25.32    | 4.1  | 6.0  | *           | China                |
|                                                                      | <i>qc5-4</i>    | 5  | PZA01371.1-PZA01327.1   | 43.04-62.04   | 6.5  | 9.5  | *           | China                |
|                                                                      | <i>qc5-2</i>    | 5  | PZA02113.1-PHM13675.17  | 72.97-90.34   | 12.5 | 16.9 | *           | China                |
|                                                                      | <i>qc5-1</i>    | 5  | PZA00352.23-PZA02060.1  | 152.75-166.18 | 4.3  | 5.4  | <i>VTE4</i> | China                |
|                                                                      | <i>qc7-1</i>    | 7  | PZA03149.4-PZA02643.1   | 48.86-62.83   | 5.3  | 6.9  | *           | China                |
| <b>(α/γ)-Toc Ratio</b>                                               | <i>qc5-2</i>    | 5  | PZA01327.1-PHM13675.17  | 62.04-90.34   | 14.9 | 26.5 | *           | China                |
|                                                                      | <i>qc5-2</i>    | 5  | PZA01327.1-PZA02207.1   | 62.04-79.77   | 11.2 | 15.5 | *           | China                |
|                                                                      | <i>qc5-2</i>    | 5  | PZA01327.1-PHM2769.43   | 62.04-83.27   | 6.8  | 9.2  | *           | China                |
|                                                                      | <i>qc6-2</i>    | 6  | PZA01729.1-PZA02328.5   | 60.5-76.8     | 4.9  | 8.7  | *           | China                |
|                                                                      | <i>qc8-1</i>    | 8  | PHM934.19-PZA02011.1    | 69.68-82.39   | 4.2  | 5.5  | *           | China                |
|                                                                      | <i>qc5-2</i>    | 5  | PZA03298.1-PHM16854.3   | 68.87-77.24   | 5.8  | 10.7 | *           | China                |
|                                                                      | <i>qc5-1</i>    | 5  | PZA02751.1-PZA02513.1   | 151.05-165.68 | 9.1  | 18.4 | <i>VTE4</i> | China                |
|                                                                      | <i>qc5-2</i>    | 5  | PZA01327.1-PHM2769.43   | 62.04-83.27   | 10.5 | 12.7 | *           | China                |
| <b>QTL Identified in K22 by Dan340 RIL population (<i>n</i>=218)</b> | <i>qc5-1</i>    | 5  | PZA00352.23-PZA02015.11 | 152.75-180.48 | 19.3 | 26.0 | <i>VTE4</i> | China                |
|                                                                      | <i>qc6-2</i>    | 6  | PZA00473.5-PZA02262.3   | 60.4-87.7     | 6.1  | 8.3  | *           | China                |
|                                                                      |                 |    |                         |               |      |      |             |                      |
| <b>α-Toc</b>                                                         | <i>qd5-1</i>    | 5  | PZA02751.1-PZA02068.1   | 151.05-169.78 | 21.9 | 52.8 | <i>VTE4</i> | China                |
|                                                                      | <i>qd8-1</i>    | 8  | PZB00592.1-PHM4203.11   | 76.29-77.22   | 3.7  | 5.0  |             | China                |
|                                                                      | <i>qd5-1</i>    | 5  | PZA02751.1-PZA02068.1   | 151.05-169.78 | 5.6  | 12.4 | <i>VTE4</i> | China                |
|                                                                      | <i>qd1-1</i>    | 1  | PHM3690.23-kip1.3       | 158.46-190.8  | 7.3  | 11.1 |             | China                |
|                                                                      | <i>qd5-1</i>    | 5  | PZA03161.1-PZA02068.1   | 144.6-169.78  | 21.8 | 39.1 | <i>VTE4</i> | China                |
|                                                                      | <i>qd10-1</i>   | 10 | PZA01642.1-PZA00079.1   | 28.06-29.45   | 4.1  | 5.4  |             | China                |
|                                                                      | <i>qd1-2</i>    | 1  | PZA02750.3-PHM2187.34   | 119.28-127.7  | 4.5  | 3.0  |             | China                |
|                                                                      |                 |    |                         |               |      |      |             |                      |

|                                                                            |                                                                             |    |                        |               |          |      |                      |         |                      |
|----------------------------------------------------------------------------|-----------------------------------------------------------------------------|----|------------------------|---------------|----------|------|----------------------|---------|----------------------|
| <b>T-Toc</b>                                                               | <i>qd1-1</i>                                                                | 1  | PZA02117.1-PHM4926.16  | 165.46-179.76 | 35.0     | 30.8 |                      | China   |                      |
|                                                                            | <i>qd5-1</i>                                                                | 5  | PZA02751.1-PZA02068.1  | 151.05-169.78 | 15.1     | 12.1 | <i>VTE4</i>          | China   |                      |
|                                                                            | <i>qd8-1</i>                                                                | 8  | PZA02748.3-PZA02011.1  | 68.92-82.39   | 6.5      | 4.4  |                      | China   |                      |
|                                                                            | <i>qd1-1</i>                                                                | 1  | PHM3690.23-PZB01647.1  | 158.46-174.76 | 13.1     | 23.5 |                      | China   |                      |
|                                                                            | <i>qd1-2</i>                                                                | 1  | PZA00887.1-PZA00358.12 | 38.74-49.57   | 5.3      | 5.4  |                      | China   |                      |
|                                                                            | <i>qd1-1</i>                                                                | 1  | PHM3690.23-kipl.3      | 158.46-190.8  | 24.3     | 32.6 |                      | China   |                      |
|                                                                            | <i>qd2-1</i>                                                                | 2  | PZA03228.4-PHM10404.8  | 54.47-70.52   | 3.8      | 4.1  |                      | China   |                      |
|                                                                            | <i>qd5-1</i>                                                                | 5  | PZA03161.1-PZA01265.1  | 144.6-163.15  | 14.4     | 18.2 | <i>VTE4</i>          | China   |                      |
|                                                                            | <i>qd1-3</i>                                                                | 1  | PZA02292.1-PZA01267.3  | 89.29-109.03  | 4.9      | 4.0  |                      | China   |                      |
|                                                                            | <i>qd1-1</i>                                                                | 1  | PHM3690.23-PZB01647.1  | 158.46-174.76 | 42.1     | 50.7 |                      | China   |                      |
|                                                                            | <i>qd5-2</i>                                                                | 5  | PZA01779.1-PZA00643.13 | 103.8-107.1   | 6.2      | 5.7  | <i>HPPD-5</i>        | China   |                      |
|                                                                            | <i>qd5-1</i>                                                                | 5  | PZA03161.1-PZA01265.1  | 144.6-163.15  | 7.5      | 6.2  | <i>VTE4</i>          | China   |                      |
|                                                                            | <i>qd1-1</i>                                                                | 1  | PHM3690.23-PZB01647.1  | 158.46-174.76 | 13.4     | 25.3 |                      | China   |                      |
|                                                                            | <i>qd1-4</i>                                                                | 1  | PZA00887.1-PZA00358.12 | 38.74-49.57   | 4.7      | 5.6  |                      | China   |                      |
|                                                                            | <i>qd1-1</i>                                                                | 1  | PHM3690.23-PZB01647.1  | 158.46-174.76 | 24.1     | 42.5 |                      | China   |                      |
|                                                                            | <i>qd2-1</i>                                                                | 2  | PZA03228.4-PHM10404.8  | 54.47-70.52   | 3.7      | 4.7  |                      | China   |                      |
|                                                                            | <i>qd1-1</i>                                                                | 1  | PHM3690.23-PHM4926.16  | 158.46-179.76 | 24.2     | 26.7 |                      | China   |                      |
|                                                                            | <i>qd5-1</i>                                                                | 5  | PZA02751.1-PZA02068.1  | 151.05-169.78 | 24.3     | 28.2 | <i>VTE4</i>          | China   |                      |
|                                                                            | <i>qd8-1</i>                                                                | 8  | PZB00592.1-LYCE.1      | 76.29-79.82   | 4.3      | 4.3  |                      | China   |                      |
|                                                                            | <i>qd1-1</i>                                                                | 1  | PHM3690.23-PZB01647.1  | 158.46-174.76 | 9.8      | 17.9 |                      | China   |                      |
|                                                                            | <i>qd5-1</i>                                                                | 5  | PZA02751.1-PZA02068.1  | 151.05-169.78 | 5.5      | 10.6 | <i>VTE4</i>          | China   |                      |
|                                                                            | <i>qd1-1</i>                                                                | 1  | PHM3690.23-PZB01647.1  | 158.46-174.76 | 3.6      | 4.7  |                      | China   |                      |
|                                                                            | <i>qd5-1</i>                                                                | 5  | PZA03161.1-PZA02068.1  | 144.6-169.78  | 26.8     | 51.0 | <i>VTE4</i>          | China   |                      |
| <b><math>\alpha</math>-Toc</b>                                             | <i>q<math>\alpha</math>-Toc-1</i>                                           | 1  | umc1177-bnlg1429       | 0-2           | 4.7      | 20.8 | *                    | China   | (Feng et al., 2013)  |
|                                                                            | <i>q<math>\alpha</math>-Toc-2</i>                                           | 2  | phi96100-umc1265       | 0-4           | 2.8      | 5.3  | *                    | China   |                      |
| <b><math>\delta</math>-Toc</b>                                             | <i>q<math>\delta</math>-Toc-1</i>                                           | 10 | umc2180-umc2163        | 145-148       | 2.6      | 4.7  | *                    | China   |                      |
| <b><math>\gamma</math>-Toc</b>                                             | <i>q<math>\gamma</math>-Toc-1</i>                                           | 1  | umc1177-bnlg1429       | 0-7           | 11.4     | 32.1 | *                    | China   |                      |
|                                                                            | <i>q<math>\gamma</math>-Toc-2</i>                                           | 5  | umc2036-HPPD-umc1692   | 67-112        | 7.4      | 13.7 | *                    | China   |                      |
| <b>T-Toc</b>                                                               | <i>qT-Toc-1</i>                                                             | 1  | umc1177-bnlg1429       | 1-6           | 6.5      | 24.6 | *                    | China   |                      |
|                                                                            | <i>qT-Toc-2</i>                                                             | 1  | bnlg1811-bnlg2086      | 92-99         | 2.7      | 6.2  | *                    | China   |                      |
|                                                                            | <i>qT-Toc-3</i>                                                             | 5  | umc2036-HPPD-umc1692   | 67-113        | 8.6      | 15.4 | *                    | China   |                      |
|                                                                            | <i>qT-Toc-4</i>                                                             | 6  | bnlg1740-phi364545     | 272-301       | 3.1      | 6.3  | *                    | China   |                      |
| <b>(<math>\alpha/\gamma</math>)-Toc Ratio</b>                              | <i>q(<math>\alpha/\gamma</math>)-Toc-1</i>                                  | 1  | umc1177-bnlg1429       | 0-1           | 12.4     | 41.2 | *                    | China   |                      |
|                                                                            | <i>q(<math>\alpha/\gamma</math>)-Toc-2</i>                                  | 2  | phi96100-umc1265       | 0-7           | 3.1      | 5.8  | *                    | China   |                      |
| <b><math>\alpha</math>T/<math>\gamma</math>T</b>                           | <i>q<math>\alpha</math>T/<math>\gamma</math>T</i>                           | 1  | S1_16043898            | 16,043,898    | 7.25E-06 | 31.0 | *                    | IN, USA | (Lipka et al., 2013) |
| <b><math>\delta</math>T/<math>\alpha</math>T</b>                           | <i>q<math>\delta</math>T/<math>\alpha</math>T</i>                           | 1  | S1_42184756            | 42,184,756    | 7.43E-06 | 34.0 | *                    | IN, USA |                      |
| <b><math>\alpha</math>T</b>                                                | <i>q<math>\alpha</math>T</i>                                                | 1  | S1_69880751            | 69,880,751    | 8.96E-06 | 32.0 | *                    | IN, USA |                      |
| <b><math>\alpha</math>T/<math>\gamma</math>T</b>                           | <i>q<math>\alpha</math>T/<math>\gamma</math>T</i>                           | 1  | S1_207726397           | 207,726,397   | 3.89E-06 | 31.0 | *                    | IN, USA |                      |
| <b><math>\alpha</math>T/<math>\gamma</math>T</b>                           | <i>q<math>\alpha</math>T/<math>\gamma</math>T</i>                           | 1  | S1_207726398           | 207,726,398   | 3.89E-06 | 31.0 | *                    | IN, USA |                      |
| <b><math>\delta</math>T3/(<math>\gamma</math>T3+<math>\alpha</math>T3)</b> | <i>q<math>\delta</math>T3/(<math>\gamma</math>T3+<math>\alpha</math>T3)</i> | 2  | S2_71606588            | 71,606,588    | 6.14E-06 | 18.0 | *                    | IN, USA |                      |
| <b><math>\alpha</math>T</b>                                                | <i>q<math>\alpha</math>T</i>                                                | 2  | S2_196514167           | 196,514,167   | 7.19E-06 | 32.0 | *                    | IN, USA |                      |
| <b><math>\alpha</math>T</b>                                                | <i>q<math>\alpha</math>T</i>                                                | 2  | S2_219396629           | 219,396,629   | 8.33E-06 | 32.0 | *                    | IN, USA |                      |
| <b><math>\alpha</math>T</b>                                                | <i>q<math>\alpha</math>T</i>                                                | 2  | S2_219396633           | 219,396,633   | 8.33E-06 | 32.0 | *                    | IN, USA |                      |
| <b><math>\gamma</math>T/(<math>\gamma</math>T+<math>\alpha</math>T)</b>    | <i>q<math>\gamma</math>T/(<math>\gamma</math>T+<math>\alpha</math>T)</i>    | 3  | ss196506839            | 197,518,747   | 5.72E-06 | 35.0 | *                    | IN, USA |                      |
| <b><math>\delta</math>T3</b>                                               | <i>q<math>\delta</math>T3</i>                                               | 5  | S5_132656905           | 132,656,905   | 2.15E-06 | 20.0 | *                    | IN, USA |                      |
| <b><math>\delta</math>T3/(<math>\gamma</math>T3+<math>\alpha</math>T3)</b> | <i>q<math>\delta</math>T3/(<math>\gamma</math>T3+<math>\alpha</math>T3)</i> | 5  | S5_133189938           | 133,189,938   | 2.29E-06 | 18.0 | *                    | IN, USA |                      |
| <b><math>\delta</math>T3</b>                                               | <i>q<math>\delta</math>T3</i>                                               | 5  | S5_133331096           | 133,331,096   | 1.01E-06 | 21.0 | <i>GRMZM2G105494</i> | IN, USA |                      |
| <b><math>\delta</math>T3</b>                                               | <i>q<math>\delta</math>T3</i>                                               | 5  | S5_133331106           | 133,331,106   | 1.01E-06 | 21.0 | <i>GRMZM2G105494</i> | IN, USA |                      |
| <b><math>\delta</math>T3</b>                                               | <i>q<math>\delta</math>T3</i>                                               | 5  | S5_133333397           | 133,333,397   | 3.06E-07 | 22.0 | <i>GRMZM2G105494</i> | IN, USA |                      |
| <b><math>\delta</math>T3</b>                                               | <i>q<math>\delta</math>T3</i>                                               | 5  | ss196465626            | 133,333,397   | 1.69E-06 | 21.0 | <i>GRMZM2G105494</i> | IN, USA |                      |
| <b><math>\delta</math>T3/(<math>\gamma</math>T3+<math>\alpha</math>T3)</b> | <i>q<math>\delta</math>T3/(<math>\gamma</math>T3+<math>\alpha</math>T3)</i> | 5  | S5_133333397           | 133,333,397   | 6.13E-06 | 18.0 | <i>GRMZM2G105494</i> | IN, USA |                      |

|                                   |                                    |   |              |             |          |      |               |         |
|-----------------------------------|------------------------------------|---|--------------|-------------|----------|------|---------------|---------|
| $\delta T3$                       | $q\delta T3$                       | 5 | S5_133333561 | 133,333,561 | 3.12E-07 | 22.0 | GRMZM2G105494 | IN, USA |
| $\delta T3/(\gamma T3+\alpha T3)$ | $q\delta T3/(\gamma T3+\alpha T3)$ | 5 | S5_133333561 | 133,333,561 | 8.28E-06 | 17.0 | GRMZM2G105494 | IN, USA |
| $\delta T3$                       | $q\delta T3$                       | 5 | S5_133335078 | 133,335,078 | 1.34E-06 | 21.0 | GRMZM2G105494 | IN, USA |
| $\delta T3/(\gamma T3+\alpha T3)$ | $q\delta T3/(\gamma T3+\alpha T3)$ | 5 | S5_133499169 | 133,499,169 | 1.77E-06 | 19.0 | GRMZM2G009785 | IN, USA |
| $\delta T3/(\gamma T3+\alpha T3)$ | $q\delta T3/(\gamma T3+\alpha T3)$ | 5 | S5_133499269 | 133,499,269 | 3.66E-06 | 18.0 | GRMZM2G009785 | IN, USA |
| $\delta T3/(\gamma T3+\alpha T3)$ | $q\delta T3/(\gamma T3+\alpha T3)$ | 5 | S5_133501858 | 133,501,858 | 1.29E-07 | 21.0 | GRMZM2G009785 | IN, USA |
| $\delta T3/(\gamma T3+\alpha T3)$ | $q\delta T3/(\gamma T3+\alpha T3)$ | 5 | S5_133501992 | 133,501,992 | 9.72E-07 | 19.0 | GRMZM2G009785 | IN, USA |
| $\delta T3/(\gamma T3+\alpha T3)$ | $q\delta T3/(\gamma T3+\alpha T3)$ | 5 | PZB00969.1   | 133,502,506 | 8.27E-07 | 19.0 | GRMZM2G009785 | IN, USA |
| $\delta T3/(\gamma T3+\alpha T3)$ | $q\delta T3/(\gamma T3+\alpha T3)$ | 5 | ss196465634  | 133,510,613 | 7.54E-06 | 17.0 | GRMZM2G009785 | IN, USA |
| $\delta T3/(\gamma T3+\alpha T3)$ | $q\delta T3/(\gamma T3+\alpha T3)$ | 5 | PZB02491.1   | 133,517,065 | 6.69E-06 | 18.0 | GRMZM2G009785 | IN, USA |
| $\delta T3/(\gamma T3+\alpha T3)$ | $q\delta T3/(\gamma T3+\alpha T3)$ | 5 | S5_133618308 | 133,618,308 | 7.89E-06 | 17.0 | *             | IN, USA |
| $\delta T3/(\gamma T3+\alpha T3)$ | $q\delta T3/(\gamma T3+\alpha T3)$ | 5 | S5_133618309 | 133,618,309 | 7.89E-06 | 17.0 | *             | IN, USA |
| $\delta T3/(\gamma T3+\alpha T3)$ | $q\delta T3/(\gamma T3+\alpha T3)$ | 5 | S5_133618344 | 133,618,344 | 7.89E-06 | 17.0 | *             | IN, USA |
| $\delta T3/(\gamma T3+\alpha T3)$ | $q\delta T3/(\gamma T3+\alpha T3)$ | 5 | S5_133691297 | 133,691,297 | 5.02E-06 | 18.0 | *             | IN, USA |
| $\delta T3/(\gamma T3+\alpha T3)$ | $q\delta T3/(\gamma T3+\alpha T3)$ | 5 | S5_133776316 | 133,776,316 | 6.51E-07 | 19.0 | *             | IN, USA |
| $\delta T3/(\gamma T3+\alpha T3)$ | $q\delta T3/(\gamma T3+\alpha T3)$ | 5 | S5_134191258 | 134,191,258 | 1.66E-06 | 19.0 | *             | IN, USA |
| $\delta T3/(\gamma T3+\alpha T3)$ | $q\delta T3/(\gamma T3+\alpha T3)$ | 5 | S5_134195301 | 134,195,301 | 2.92E-06 | 18.0 | *             | IN, USA |
| $\delta T3/(\gamma T3+\alpha T3)$ | $q\delta T3/(\gamma T3+\alpha T3)$ | 5 | S5_134471200 | 134,471,200 | 1.13E-06 | 19.0 | *             | IN, USA |
| $\delta T3/(\gamma T3+\alpha T3)$ | $q\delta T3/(\gamma T3+\alpha T3)$ | 5 | S5_134489952 | 134,489,952 | 1.13E-06 | 19.0 | *             | IN, USA |
| $\delta T3/(\gamma T3+\alpha T3)$ | $q\delta T3/(\gamma T3+\alpha T3)$ | 5 | S5_134751850 | 134,751,850 | 2.34E-06 | 18.0 | *             | IN, USA |
| $\delta T3/(\gamma T3+\alpha T3)$ | $q\delta T3/(\gamma T3+\alpha T3)$ | 5 | S5_134751883 | 134,751,883 | 7.69E-06 | 17.0 | *             | IN, USA |
| $\delta T3/(\gamma T3+\alpha T3)$ | $q\delta T3/(\gamma T3+\alpha T3)$ | 5 | S5_134751924 | 134,751,924 | 6.83E-06 | 18.0 | *             | IN, USA |
| $\delta T3/(\gamma T3+\alpha T3)$ | $q\delta T3/(\gamma T3+\alpha T3)$ | 5 | S5_134787527 | 134,787,527 | 6.62E-06 | 18.0 | *             | IN, USA |
| $\delta T3/(\gamma T3+\alpha T3)$ | $q\delta T3/(\gamma T3+\alpha T3)$ | 5 | S5_135908766 | 135,908,766 | 8.47E-06 | 17.0 | *             | IN, USA |
| $\delta T3/(\gamma T3+\alpha T3)$ | $q\delta T3/(\gamma T3+\alpha T3)$ | 5 | S5_135908783 | 135,908,783 | 8.47E-06 | 17.0 | *             | IN, USA |
| $\gamma T/(\gamma T+\alpha T)$    | $q\gamma T/(\gamma T+\alpha T)$    | 5 | S5_190739882 | 190,739,882 | 1.15E-06 | 36.0 | GRMZM2G031952 | IN, USA |
| $\alpha T/\gamma T$               | $q\alpha T/\gamma T$               | 5 | S5_190739882 | 190,739,882 | 7.45E-06 | 31.0 | GRMZM2G031952 | IN, USA |
| $\gamma T/(\gamma T+\alpha T)$    | $q\gamma T/(\gamma T+\alpha T)$    | 5 | S5_190739951 | 190,739,951 | 9.59E-08 | 37.0 | GRMZM2G031952 | IN, USA |
| $\alpha T/\gamma T$               | $q\alpha T/\gamma T$               | 5 | S5_190739951 | 190,739,951 | 5.40E-07 | 33.0 | GRMZM2G031952 | IN, USA |
| $\alpha T$                        | $q\alpha T$                        | 5 | S5_198205644 | 198,205,644 | 3.56E-06 | 32.0 | GRMZM2G058943 | IN, USA |
| $\alpha T$                        | $q\alpha T$                        | 5 | S5_199647093 | 199,647,093 | 3.54E-06 | 32.0 | GRMZM5G823157 | IN, USA |
| $\delta T/\alpha T$               | $q\delta T/\alpha T$               | 5 | S5_199647093 | 199,647,093 | 4.26E-06 | 34.0 | GRMZM5G823157 | IN, USA |
| $\alpha T/\gamma T$               | $q\alpha T/\gamma T$               | 5 | S5_199706178 | 199,706,178 | 1.07E-06 | 32.0 | *             | IN, USA |
| $\gamma T/(\gamma T+\alpha T)$    | $q\gamma T/(\gamma T+\alpha T)$    | 5 | S5_199706178 | 199,706,178 | 1.22E-06 | 36.0 | *             | IN, USA |
| $\delta T/\alpha T$               | $q\delta T/\alpha T$               | 5 | S5_199706178 | 199,706,178 | 1.68E-06 | 35.0 | *             | IN, USA |
| $\alpha T/\gamma T$               | $q\alpha T/\gamma T$               | 5 | S5_199706244 | 199,706,244 | 8.86E-06 | 31.0 | *             | IN, USA |
| $\alpha T$                        | $q\alpha T$                        | 5 | S5_200114137 | 200,114,137 | 2.63E-07 | 34.0 | GRMZM2G108996 | IN, USA |
| $\gamma T/(\gamma T+\alpha T)$    | $q\gamma T/(\gamma T+\alpha T)$    | 5 | S5_200293693 | 200,293,693 | 1.24E-06 | 36.0 | GRMZM2G034876 | IN, USA |
| $\alpha T$                        | $q\alpha T$                        | 5 | S5_200293693 | 200,293,693 | 3.33E-06 | 32.0 | GRMZM2G034876 | IN, USA |
| $\alpha T/\gamma T$               | $q\alpha T/\gamma T$               | 5 | S5_200293693 | 200,293,693 | 8.10E-06 | 31.0 | GRMZM2G034876 | IN, USA |
| $\delta T/\alpha T$               | $q\delta T/\alpha T$               | 5 | ss196468356  | 200,300,836 | 6.33E-06 | 34.0 | *             | IN, USA |
| $\alpha T$                        | $q\alpha T$                        | 5 | S5_200318615 | 200,318,615 | 1.05E-06 | 33.0 | *             | IN, USA |
| $\alpha T/\gamma T$               | $q\alpha T/\gamma T$               | 5 | S5_200318615 | 200,318,615 | 2.50E-06 | 32.0 | *             | IN, USA |
| $\alpha T$                        | $q\alpha T$                        | 5 | ss196416269  | 200,367,532 | 7.36E-14 | 44.0 | GRMZM2G035213 | IN, USA |
| $\alpha T$                        | $q\alpha T$                        | 5 | PZB02283.1   | 200,367,532 | 7.36E-14 | 44.0 | GRMZM2G035213 | IN, USA |
| $\alpha T/\gamma T$               | $q\alpha T/\gamma T$               | 5 | PZB02283.1   | 200,367,532 | 9.21E-13 | 42.0 | GRMZM2G035213 | IN, USA |
| $\alpha T/\gamma T$               | $q\alpha T/\gamma T$               | 5 | ss196416269  | 200,367,532 | 9.21E-13 | 42.0 | GRMZM2G035213 | IN, USA |
| $\gamma T/(\gamma T+\alpha T)$    | $q\gamma T/(\gamma T+\alpha T)$    | 5 | PZB02283.1   | 200,367,532 | 4.82E-12 | 44.0 | GRMZM2G035213 | IN, USA |
| $\gamma T/(\gamma T+\alpha T)$    | $q\gamma T/(\gamma T+\alpha T)$    | 5 | ss196416269  | 200,367,532 | 4.82E-12 | 44.0 | GRMZM2G035213 | IN, USA |
| $\delta T/\alpha T$               | $q\delta T/\alpha T$               | 5 | PZB02283.1   | 200,367,532 | 1.88E-11 | 42.0 | GRMZM2G035213 | IN, USA |
| $\delta T/\alpha T$               | $q\delta T/\alpha T$               | 5 | ss196416269  | 200,367,532 | 1.88E-11 | 42.0 | GRMZM2G035213 | IN, USA |
| $\alpha T$                        | $q\alpha T$                        | 5 | ss196468362  | 200,369,124 | 7.36E-14 | 44.0 | GRMZM2G035213 | IN, USA |

|                                |                                 |   |              |             |          |      |               |         |
|--------------------------------|---------------------------------|---|--------------|-------------|----------|------|---------------|---------|
| $\alpha T/\gamma T$            | $qaT/\gamma T$                  | 5 | ss196468362  | 200,369,124 | 9.21E-13 | 42.0 | GRMZM2G035213 | IN, USA |
| $\gamma T/(\gamma T+\alpha T)$ | $q\gamma T/(\gamma T+\alpha T)$ | 5 | ss196468362  | 200,369,124 | 4.82E-12 | 44.0 | GRMZM2G035213 | IN, USA |
| $\delta T/\alpha T$            | $q\delta T/\alpha T$            | 5 | ss196468362  | 200,369,124 | 1.88E-11 | 42.0 | GRMZM2G035213 | IN, USA |
| $\alpha T$                     | $qaT$                           | 5 | S5_200369481 | 200,369,481 | 1.97E-08 | 35.0 | GRMZM2G035213 | IN, USA |
| $\alpha T/\gamma T$            | $qaT/\gamma T$                  | 5 | S5_200369481 | 200,369,481 | 7.24E-07 | 32.0 | GRMZM2G035213 | IN, USA |
| $\gamma T/(\gamma T+\alpha T)$ | $q\gamma T/(\gamma T+\alpha T)$ | 5 | S5_200369481 | 200,369,481 | 6.15E-09 | 39.0 | GRMZM2G035213 | IN, USA |
| $\delta T/\alpha T$            | $q\delta T/\alpha T$            | 5 | S5_200369481 | 200,369,481 | 7.21E-07 | 35.0 | GRMZM2G035213 | IN, USA |
| $\alpha T$                     | $qaT$                           | 5 | S5_200369508 | 200,369,508 | 6.85E-07 | 33.0 | GRMZM2G035213 | IN, USA |
| $\alpha T/\gamma T$            | $qaT/\gamma T$                  | 5 | S5_200369508 | 200,369,508 | 9.69E-07 | 32.0 | GRMZM2G035213 | IN, USA |
| $\gamma T/(\gamma T+\alpha T)$ | $q\gamma T/(\gamma T+\alpha T)$ | 5 | S5_200369508 | 200,369,508 | 6.57E-07 | 36.0 | GRMZM2G035213 | IN, USA |
| $\alpha T$                     | $qaT$                           | 5 | S5_200369534 | 200,369,534 | 2.59E-06 | 32.0 | GRMZM2G035213 | IN, USA |
| $\alpha T/\gamma T$            | $qaT/\gamma T$                  | 5 | S5_200369534 | 200,369,534 | 5.45E-06 | 31.0 | GRMZM2G035213 | IN, USA |
| $\alpha T$                     | $qaT$                           | 5 | S5_200369625 | 200,369,625 | 5.00E-08 | 35.0 | GRMZM2G035213 | IN, USA |
| $\delta T/\alpha T$            | $q\delta T/\alpha T$            | 5 | S5_200369625 | 200,369,625 | 2.02E-06 | 35.0 | GRMZM2G035213 | IN, USA |
| $\alpha T$                     | $qaT$                           | 5 | S5_200369644 | 200,369,644 | 9.36E-06 | 32.0 | GRMZM2G035213 | IN, USA |
| $\alpha T/\gamma T$            | $qaT/\gamma T$                  | 5 | S5_200369644 | 200,369,644 | 9.97E-06 | 31.0 | GRMZM2G035213 | IN, USA |
| $\alpha T$                     | $qaT$                           | 5 | S5_200369665 | 200,369,665 | 9.36E-06 | 32.0 | GRMZM2G035213 | IN, USA |
| $\alpha T/\gamma T$            | $qaT/\gamma T$                  | 5 | S5_200369665 | 200,369,665 | 9.97E-06 | 31.0 | GRMZM2G035213 | IN, USA |
| $\alpha T$                     | $qaT$                           | 5 | S5_200369667 | 200,369,667 | 1.67E-07 | 34.0 | GRMZM2G035213 | IN, USA |
| $\alpha T/\gamma T$            | $qaT/\gamma T$                  | 5 | S5_200369667 | 200,369,667 | 1.70E-07 | 33.0 | GRMZM2G035213 | IN, USA |
| $\delta T/\alpha T$            | $q\delta T/\alpha T$            | 5 | S5_200369667 | 200,369,667 | 7.09E-06 | 34.0 | GRMZM2G035213 | IN, USA |
| $\alpha T$                     | $qaT$                           | 5 | PZB02424.2   | 200,370,309 | 4.09E-07 | 33.0 | GRMZM2G035213 | IN, USA |
| $\alpha T$                     | $qaT$                           | 5 | ss196468368  | 200,371,057 | 6.73E-06 | 32.0 | GRMZM2G035213 | IN, USA |
| $\alpha T/\gamma T$            | $qaT/\gamma T$                  | 5 | ss196468368  | 200,371,057 | 7.37E-06 | 31.0 | GRMZM2G035213 | IN, USA |
| $\gamma T/(\gamma T+\alpha T)$ | $q\gamma T/(\gamma T+\alpha T)$ | 5 | S5_200382168 | 200,382,168 | 9.59E-09 | 39.0 | GRMZM2G167431 | IN, USA |
| $\alpha T$                     | $qaT$                           | 5 | S5_200382168 | 200,382,168 | 3.01E-08 | 35.0 | GRMZM2G167431 | IN, USA |
| $\alpha T/\gamma T$            | $qaT/\gamma T$                  | 5 | S5_200382168 | 200,382,168 | 3.08E-08 | 34.0 | GRMZM2G167431 | IN, USA |
| $\delta T/\alpha T$            | $q\delta T/\alpha T$            | 5 | S5_200382168 | 200,382,168 | 6.31E-08 | 37.0 | GRMZM2G167431 | IN, USA |
| $\gamma T/(\gamma T+\alpha T)$ | $q\gamma T/(\gamma T+\alpha T)$ | 5 | S5_200435108 | 200,435,108 | 1.13E-10 | 42.0 | GRMZM2G325001 | IN, USA |
| $\alpha T/\gamma T$            | $qaT/\gamma T$                  | 5 | S5_200435108 | 200,435,108 | 3.28E-10 | 38.0 | GRMZM2G325001 | IN, USA |
| $\alpha T$                     | $qaT$                           | 5 | S5_200435108 | 200,435,108 | 4.39E-10 | 38.0 | GRMZM2G325001 | IN, USA |
| $\delta T/\alpha T$            | $q\delta T/\alpha T$            | 5 | S5_200435108 | 200,435,108 | 6.37E-09 | 39.0 | GRMZM2G325001 | IN, USA |
| $\alpha T$                     | $qaT$                           | 5 | S5_200435117 | 200,435,117 | 1.21E-07 | 34.0 | GRMZM2G325001 | IN, USA |
| $\gamma T/(\gamma T+\alpha T)$ | $q\gamma T/(\gamma T+\alpha T)$ | 5 | S5_200435117 | 200,435,117 | 1.66E-07 | 37.0 | GRMZM2G325001 | IN, USA |
| $\alpha T/\gamma T$            | $qaT/\gamma T$                  | 5 | S5_200435117 | 200,435,117 | 1.79E-07 | 33.0 | GRMZM2G325001 | IN, USA |
| $\delta T/\alpha T$            | $q\delta T/\alpha T$            | 5 | S5_200435117 | 200,435,117 | 7.93E-07 | 35.0 | GRMZM2G325001 | IN, USA |
| $\alpha T$                     | $qaT$                           | 5 | ss196468352  | 200,435,300 | 8.32E-10 | 38.0 | GRMZM2G325019 | IN, USA |
| $\gamma T/(\gamma T+\alpha T)$ | $q\gamma T/(\gamma T+\alpha T)$ | 5 | ss196468352  | 200,435,300 | 7.67E-09 | 39.0 | GRMZM2G325019 | IN, USA |
| $\alpha T/\gamma T$            | $qaT/\gamma T$                  | 5 | ss196468352  | 200,435,300 | 2.68E-08 | 35.0 | GRMZM2G325019 | IN, USA |
| $\delta T/\alpha T$            | $q\delta T/\alpha T$            | 5 | ss196468352  | 200,435,300 | 2.87E-08 | 38.0 | GRMZM2G325019 | IN, USA |
| $\alpha T$                     | $qaT$                           | 5 | S5_200437468 | 200,437,468 | 2.29E-08 | 35.0 | GRMZM2G325019 | IN, USA |
| $\gamma T/(\gamma T+\alpha T)$ | $q\gamma T/(\gamma T+\alpha T)$ | 5 | S5_200437468 | 200,437,468 | 4.13E-08 | 38.0 | GRMZM2G325019 | IN, USA |
| $\alpha T/\gamma T$            | $qaT/\gamma T$                  | 5 | S5_200437468 | 200,437,468 | 9.02E-08 | 34.0 | GRMZM2G325019 | IN, USA |
| $\delta T/\alpha T$            | $q\delta T/\alpha T$            | 5 | S5_200437468 | 200,437,468 | 3.72E-07 | 36.0 | GRMZM2G325019 | IN, USA |
| $\alpha T/\gamma T$            | $qaT/\gamma T$                  | 5 | ss196517251  | 200,437,606 | 4.45E-07 | 33.0 | GRMZM2G325019 | IN, USA |
| $\alpha T$                     | $qaT$                           | 5 | ss196517251  | 200,437,606 | 1.38E-06 | 33.0 | GRMZM2G325019 | IN, USA |
| $\gamma T/(\gamma T+\alpha T)$ | $q\gamma T/(\gamma T+\alpha T)$ | 5 | ss196517251  | 200,437,606 | 2.99E-06 | 35.0 | GRMZM2G325019 | IN, USA |
| $\delta T/\alpha T$            | $q\delta T/\alpha T$            | 5 | ss196517251  | 200,437,606 | 5.53E-06 | 34.0 | GRMZM2G325019 | IN, USA |
| $\alpha T$                     | $qaT$                           | 5 | S5_200438801 | 200,438,801 | 4.30E-06 | 32.0 | GRMZM2G325038 | IN, USA |
| $\alpha T/\gamma T$            | $qaT/\gamma T$                  | 5 | S5_200438801 | 200,438,801 | 7.67E-06 | 31.0 | GRMZM2G325038 | IN, USA |
| $\alpha T/\gamma T$            | $qaT/\gamma T$                  | 5 | S5_204064933 | 204,064,933 | 3.15E-08 | 34.0 | GRMZM2G161641 | IN, USA |
| $\gamma T/(\gamma T+\alpha T)$ | $q\gamma T/(\gamma T+\alpha T)$ | 5 | S5_204064933 | 204,064,933 | 3.32E-07 | 36.0 | GRMZM2G161641 | IN, USA |

|                                |                                 |    |               |             |          |        |                                                                                  |         |                            |
|--------------------------------|---------------------------------|----|---------------|-------------|----------|--------|----------------------------------------------------------------------------------|---------|----------------------------|
| $\alpha T$                     | $qaT$                           | 5  | S5_204064933  | 204,064,933 | 1.16E-06 | 33.0   | GRMZM2G161641                                                                    | IN, USA |                            |
| $\delta T/\alpha T$            | $q\delta T/\alpha T$            | 5  | S5_204064933  | 204,064,933 | 8.84E-07 | 35.0   | GRMZM2G161641                                                                    | IN, USA |                            |
| $\alpha T/\gamma T$            | $qaT/\gamma T$                  | 5  | S5_204065009  | 204,065,009 | 3.42E-07 | 33.0   | GRMZM2G161641                                                                    | IN, USA |                            |
| $\delta T/\alpha T$            | $q\delta T/\alpha T$            | 5  | S5_204065009  | 204,065,009 | 3.87E-07 | 36.0   | GRMZM2G161641                                                                    | IN, USA |                            |
| $\gamma T/(\gamma T+\alpha T)$ | $q\gamma T/(\gamma T+\alpha T)$ | 5  | S5_204065009  | 204,065,009 | 1.74E-06 | 35.0   | GRMZM2G161641                                                                    | IN, USA |                            |
| $\alpha T$                     | $qaT$                           | 5  | S5_204065009  | 204,065,009 | 4.64E-06 | 32.0   | GRMZM2G161641                                                                    | IN, USA |                            |
| $\delta T/\alpha T$            | $q\delta T/\alpha T$            | 5  | S5_204065055  | 204,065,055 | 4.68E-08 | 37.0   | GRMZM2G161641                                                                    | IN, USA |                            |
| $\alpha T/\gamma T$            | $qaT/\gamma T$                  | 5  | S5_204065055  | 204,065,055 | 2.36E-06 | 32.0   | GRMZM2G161641                                                                    | IN, USA |                            |
| $\alpha T/\gamma T$            | $qaT/\gamma T$                  | 6  | S6_149776596  | 149,776,596 | 9.71E-07 | 32.0   | *                                                                                | IN, USA |                            |
| $\alpha T$                     | $qaT$                           | 6  | S6_149776596  | 149,776,596 | 6.87E-06 | 32.0   | *                                                                                | IN, USA |                            |
| $\alpha T/\gamma T$            | $qaT/\gamma T$                  | 6  | S6_149776597  | 149,776,597 | 4.37E-06 | 31.0   | *                                                                                | IN, USA |                            |
| $\alpha T$                     | $qaT$                           | 6  | S6_149776597  | 149,776,597 | 1.03E-05 | 31.0   | *                                                                                | IN, USA |                            |
| $\alpha T/\gamma T$            | $qaT/\gamma T$                  | 7  | ss196475603   | 13,959,219  | 1.25E-05 | 31.0   | *                                                                                | IN, USA |                            |
| $\alpha T/\gamma T$            | $qaT/\gamma T$                  | 8  | ss196486649   | 128,548,850 | 7.50E-06 | 31.0   | *                                                                                | IN, USA |                            |
| $\gamma T3$                    | $q\gamma T3$                    | 9  | S9_92718671   | 92,718,671  | 4.48E-07 | 28.0   | GRMZM5G833760                                                                    | IN, USA |                            |
| $\gamma T3$                    | $q\gamma T3$                    | 9  | S9_92718674   | 92,718,674  | 4.48E-07 | 28.0   | GRMZM5G833760                                                                    | IN, USA |                            |
| $\gamma T3$                    | $\gamma T3$                     | 9  | S9_92718709   | 92,718,709  | 4.48E-07 | 28.0   | GRMZM5G833760                                                                    | IN, USA |                            |
| <b>Total</b>                   |                                 |    |               |             |          |        |                                                                                  | IN, USA |                            |
| <b>Tocotrienols</b>            | $qT$ -Tocotrienols              | 9  | S9_107839821  | 107,839,821 | 2.00E-07 | 30.0   | *                                                                                | IN, USA |                            |
| $\alpha T/\gamma T$            | $qaT/\gamma T$                  | 9  | S9_151726463  | 151,726,463 | 4.81E-06 | 31.0   | *                                                                                | IN, USA |                            |
| $\alpha T/\gamma T$            | $qaT/\gamma T$                  | 9  | S9_151726511  | 151,726,511 | 1.07E-05 | 31.0   | *                                                                                | IN, USA |                            |
| $\alpha T/\gamma T$            | $qaT/\gamma T$                  | 9  | S9_151726870  | 151,726,870 | 9.55E-06 | 31.0   | *                                                                                | IN, USA |                            |
| $\alpha T/\gamma T$            | $qaT/\gamma T$                  | 9  | S9_155585508  | 155,585,508 | 2.62E-06 | 32.0   | *                                                                                | IN, USA |                            |
| $\delta T/\alpha T$            | $q\delta T/\alpha T$            | 9  | S9_155585508  | 155,585,508 | 2.75E-06 | 35.0   | *                                                                                | IN, USA |                            |
| $\delta T/\alpha T$            | $q\delta T/\alpha T$            | 10 | S10_129705301 | 129,705,301 | 6.39E-06 | 34.0   | *                                                                                | IN, USA |                            |
| $\delta T/\alpha T$            | $q\delta T/\alpha T$            | 10 | S10_129705304 | 129,705,304 | 6.39E-06 | 34.0   | *                                                                                | IN, USA |                            |
| $\alpha T$                     | $qaT$ -1                        | 1  | S_30027714    | 48.9        | 1.21     | 29.53  | Chorismate synthase                                                              | IN, USA | (Diepenbrock et al., 2017) |
|                                | $qaT$ -2                        | 1  | S_230132209   | 136.3       | 0.01     | 27.18  | *                                                                                | IN, USA |                            |
|                                | $qaT$ -3                        | 2  | S_210456683   | 116.3       | 0.01     | 26.32  | *                                                                                | IN, USA |                            |
|                                | $qaT$ -4                        | 3  | S_160847275   | 72.4        | 0.01     | 24.09  | *                                                                                | IN, USA |                            |
|                                | $qaT$ -5                        | 3  | S_188410390   | 98          | 0.01     | 22.92  | 4-diphosphocytidyl-2-C-methyl-D-erythritol kinase, chorismate mutase             | IN, USA |                            |
|                                | $qaT$ -6                        | 4  | S_13319985    | 35.2        | 0.02     | 39.60  | *                                                                                | IN, USA |                            |
|                                | $qaT$ -7                        | 4  | S_171741420   | 79          | 0.01     | 30.45  | *                                                                                | IN, USA |                            |
|                                | $qaT$ -8                        | 5  | S_24668030    | 53.9        | 0.01     | 25.70  | *                                                                                | IN, USA |                            |
|                                | $qaT$ -9                        | 5  | S_200356718   | 106.8       | 0.48     | 755.11 | Gamma-tocopherol methyltransferase (VTE4)                                        | IN, USA |                            |
|                                | $qaT$ -10                       | 6  | S_140347572   | 54.4        | 0.01     | 32.73  | *                                                                                | IN, USA |                            |
|                                | $qaT$ -11                       | 7  | S_140150735   | 73          | 0.02     | 44.64  | *                                                                                | IN, USA |                            |
|                                | $qaT$ -12                       | 8  | S_141756913   | 71.6        | 0.02     | 50.62  | *                                                                                | IN, USA |                            |
|                                | $qaT$ -13                       | 9  | S_27141915    | 43.6        | 0.02     | 40.57  | Arogenate/prephenate dehydrogenase family protein, Homogentisate 1,2-dioxygenase | IN, USA |                            |
| $\delta T$                     | $q\delta T$ -1                  | 1  | S_32200366    | 51.2        | 0.01     | 22.23  | Chorismate synthase                                                              | IN, USA |                            |
|                                | $q\delta T$ -2                  | 1  | S_174102804   | 94.3        | 0.08     | 136.26 | MPBQ/MSBQ methyl transferase (VTE3)                                              | IN, USA |                            |
|                                | $q\delta T$ -3                  | 1  | S_227227502   | 133.8       | 0.06     | 99.97  | *                                                                                | IN, USA |                            |
|                                | $q\delta T$ -4                  | 2  | S_37143380    | 65.7        | 0.01     | 24.02  | *                                                                                | IN, USA |                            |
|                                | $q\delta T$ -5                  | 2  | S_210003103   | 115.7       | 0.04     | 78.35  | *                                                                                | IN, USA |                            |
|                                | $q\delta T$ -6                  | 3  | S_173244742   | 82.1        | 0.01     | 22.78  | Prephenate amino transferase                                                     | IN, USA |                            |



|               |                  |    |             |       |      |        |                                                                                                          |         |
|---------------|------------------|----|-------------|-------|------|--------|----------------------------------------------------------------------------------------------------------|---------|
| <b>γT</b>     | <i>qδT-7</i>     | 4  | S_26785112  | 48.4  | 0.01 | 22.44  |                                                                                                          | IN, USA |
|               | <i>qδT-8</i>     | 5  | S_25536964  | 54.2  | 0.14 | 167.62 |                                                                                                          | IN, USA |
|               | <i>qδT-9</i>     | 5  | S_133824940 | 70.9  | 0.05 | 55.83  | Tocopherol cyclase (VTE1)                                                                                | IN, USA |
|               | <i>qδT-10</i>    | 5  | S_196287168 | 103.8 | 0.02 | 22.55  | 2-C-methyl-D-erythritol 2,4-cyclodiphosphate synthase                                                    | IN, USA |
|               | <i>qδT-11</i>    | 5  | S_204809285 | 114   | 0.03 | 34.17  | *                                                                                                        | IN, USA |
|               | <i>qδT-12</i>    | 6  | S_108619629 | 32.1  | 0.02 | 32.38  | *                                                                                                        | IN, USA |
|               | <i>qδT-13</i>    | 6  | S_159984809 | 83.9  | 0.01 | 19.62  | *                                                                                                        | IN, USA |
|               | <i>qδT-14</i>    | 7  | S_34185670  | 48.1  | 0.02 | 45.62  | Chlorophyllase, 4-hydroxyphenylpyruvate dioxygenase                                                      | IN, USA |
|               | <i>qδT-15</i>    | 9  | S_31124337  | 44.6  | 0.04 | 62.90  | homogentisate 1,2-dioxygenase                                                                            | IN, USA |
|               | <i>qδT-16</i>    | 9  | S_149164320 | 93.4  | 0.02 | 33.30  | *                                                                                                        | IN, USA |
|               | <i>qδT-17</i>    | 10 | S_78533820  | 38.7  | 0.01 | 22.17  | *                                                                                                        | IN, USA |
|               | <i>qδT-18</i>    | 10 | S_144982565 | 83.1  | 0.02 | 42.59  | *                                                                                                        | IN, USA |
|               | <i>qγT-1</i>     | 1  | S_12293829  | 24.4  | 0.01 | 19.24  | Solanesyl diphosphate synthase                                                                           | IN, USA |
|               | <i>qγT-2</i>     | 1  | S_32578218  | 51.6  | 0.02 | 34.62  | Chorismate synthase                                                                                      | IN, USA |
|               | <i>qγT-3</i>     | 1  | S_227227502 | 133.8 | 0.11 | 210.16 | *                                                                                                        | IN, USA |
|               | <i>qγT-4</i>     | 2  | S_32255033  | 62.8  | 0.01 | 28.09  | *                                                                                                        | IN, USA |
|               | <i>qγT-5</i>     | 2  | S_195781723 | 103.9 | 0.02 | 22.98  | 3-dehydroquinate synthase                                                                                | IN, USA |
|               | <i>qγT-6</i>     | 2  | S_209749910 | 115.5 | 0.08 | 95.76  |                                                                                                          | IN, USA |
|               | <i>qγT-7</i>     | 3  | S_25884552  | 52.5  | 0.01 | 21.59  |                                                                                                          | IN, USA |
|               | <i>qγT-8</i>     | 3  | S_199624131 | 104.9 | 0.01 | 18.78  | Chorismate mutase                                                                                        | IN, USA |
|               | <i>qγT-9</i>     | 4  | S_27272892  | 48.6  | 0.02 | 36.57  | *                                                                                                        | IN, USA |
|               | <i>qγT-10</i>    | 5  | S_25247319  | 54.1  | 0.18 | #####  | *                                                                                                        | IN, USA |
|               | <i>qγT-11</i>    | 5  | S_90566175  | 69.5  | 0.01 | 19.09  | Chorismate mutase, Tyrosine transaminase, 4-hydroxyphenylpyruvate dioxygenase, Tocopherol cyclase (VTE1) | IN, USA |
|               | <i>qγT-12</i>    | 5  | S_200161433 | 106.7 | 0.03 | 54.04  | Gamma-tocopherol methyltransferase (VTE4)                                                                | IN, USA |
|               | <i>qγT-13</i>    | 6  | S_75052175  | 10.3  | 0.01 | 20.75  | Arogenate/prephenate dehydrogenase family protein                                                        | IN, USA |
|               | <i>qγT-14</i>    | 6  | S_118012160 | 43.2  | 0.02 | 34.36  | *                                                                                                        | IN, USA |
|               | <i>qγT-15</i>    | 6  | S_157048924 | 76.4  | 0.01 | 22.27  | *                                                                                                        | IN, USA |
|               | <i>qγT-16</i>    | 7  | S_129999310 | 64.4  | 0.01 | 22.35  | *                                                                                                        | IN, USA |
|               | <i>qγT-17</i>    | 8  | S_136940374 | 70    | 0.01 | 31.19  | *                                                                                                        | IN, USA |
|               | <i>qγT-18</i>    | 9  | S_94334531  | 47.4  | 0.03 | 46.94  | Homogentisic acid geranylgeranyl transferase 1 (HGGT1)                                                   | IN, USA |
|               | <i>qγT-19</i>    | 9  | S_138294095 | 70    | 0.01 | 21.21  | Arogenate/prephenate dehydratase                                                                         | IN, USA |
|               | <i>qγT-20</i>    | 10 | S_24852570  | 35.4  | 0.02 | 38.14  | Shikimate biosynthesis protein aroDE, maleylacetoacetate isomerase                                       | IN, USA |
| <b>TotalT</b> | <i>qγT-21</i>    | 10 | S_144982565 | 83.1  | 0.02 | 37.56  | *                                                                                                        | IN, USA |
|               | <i>qTotalT-1</i> | 1  | S_33258826  | 52.5  | 0.02 | 35.59  | Chorismate synthase                                                                                      | IN, USA |
|               | <i>qTotalT-2</i> | 1  | S_227227502 | 133.8 | 0.10 | 175.70 | *                                                                                                        | IN, USA |
|               | <i>qTotalT-3</i> | 2  | S_22420256  | 53.6  | 0.01 | 23.98  | *                                                                                                        | IN, USA |
|               | <i>qTotalT-4</i> | 2  | S_195781723 | 103.9 | 0.02 | 20.02  | 3-dehydroquinate synthase                                                                                | IN, USA |
|               | <i>qTotalT-5</i> | 2  | S_209749910 | 115.5 | 0.07 | 78.34  | *                                                                                                        | IN, USA |

|             |                                 |    |             |       |      |       |                                                                                                                                         |         |
|-------------|---------------------------------|----|-------------|-------|------|-------|-----------------------------------------------------------------------------------------------------------------------------------------|---------|
| $\alpha$ T3 | <i>qTotalT-6</i>                | 3  | S_24965860  | 52.2  | 0.01 | 23.49 | *                                                                                                                                       | IN, USA |
|             | <i>qTotalT-7</i>                | 3  | S_190652083 | 99.4  | 0.01 | 21.57 | Chorismate mutase                                                                                                                       | IN, USA |
|             | <i>qTotalT-8</i>                | 4  | S_29529943  | 49.5  | 0.02 | 34.82 | *                                                                                                                                       | IN, USA |
|             | <i>qTotalT-9</i>                | 5  | S_25247319  | 54.1  | 0.18 | ####  | *                                                                                                                                       | IN, USA |
|             | <i>qTotalT-10</i>               | 5  | S_145388055 | 72.3  | 0.01 | 21.61 | Chorismate mutase, tocopherol cyclase (VTE1)                                                                                            | IN, USA |
|             | <i>qTotalT-11</i>               | 6  | S_75052175  | 10.3  | 0.01 | 18.03 | Arogenate/prephenate dehydrogenase family protein                                                                                       | IN, USA |
|             | <i>qTotalT-12</i>               | 6  | S_117936528 | 43.1  | 0.02 | 30.59 | *                                                                                                                                       | IN, USA |
|             | <i>qTotalT-13</i>               | 6  | S_157048924 | 76.4  | 0.01 | 19.25 | *                                                                                                                                       | IN, USA |
|             | <i>qTotalT-14</i>               | 8  | S_143642609 | 72.8  | 0.02 | 34.52 | *                                                                                                                                       | IN, USA |
|             | <i>qTotalT-15</i>               | 9  | S_94334531  | 47.4  | 0.03 | 49.65 | Homogentisic acid geranylgeranyl transferase 1 (HGGT1)                                                                                  | IN, USA |
|             | <i>qTotalT-16</i>               | 9  | S_138294095 | 70    | 0.01 | 22.48 | Arogenate/prephenate dehydratase                                                                                                        | IN, USA |
|             | <i>qTotalT-17</i>               | 10 | S_24852570  | 35.4  | 0.02 | 32.71 | Shikimate biosynthesis protein aroDE, maleylacetoacetate isomerase                                                                      | IN, USA |
|             | <i>qTotalT-18</i>               | 10 | S_144982565 | 83.1  | 0.02 | 33.65 | *                                                                                                                                       | IN, USA |
|             | <i>qaT3-1</i>                   | 1  | S_37464200  | 55.7  | 0.01 | 25.24 | *                                                                                                                                       | IN, USA |
|             | <i>qaT3-2</i>                   | 1  | S_259191668 | 155.1 | 0.02 | 27.53 | *                                                                                                                                       | IN, USA |
|             | <i>qaT3-3</i>                   | 1  | S_280349239 | 172.7 | 0.01 | 23.22 | *                                                                                                                                       | IN, USA |
|             | <i>qaT3-4</i>                   | 2  | S_39280552  | 67.1  | 0.01 | 21.67 | *                                                                                                                                       | IN, USA |
|             | <i>qaT3-5</i>                   | 3  | S_143898953 | 63.7  | 0.03 | 59.29 | *                                                                                                                                       | IN, USA |
|             | <i>qaT3-6</i>                   | 3  | S_229858254 | 153.8 | 0.01 | 30.65 | *                                                                                                                                       | IN, USA |
|             | <i>qaT3-7</i>                   | 4  | S_75010949  | 56.6  | 0.02 | 51.01 | Chorismate mutase                                                                                                                       | IN, USA |
|             | <i>qaT3-8</i>                   | 5  | S_73132746  | 65.9  | 0.02 | 30.98 | Light harvesting-like protein 3, argenatate/prephenate dehydrogenase family protein, argenatate/prephenate dehydrogenase family protein | IN, USA |
|             | <i>qaT3-9</i>                   | 5  | S_200356718 | 106.8 | 0.32 | *     | Gamma-tocopherol methyltransferase (VTE4)                                                                                               | IN, USA |
|             | <i>qaT3-10</i>                  | 6  | S_108288402 | 31.9  | 0.01 | 20.52 | *                                                                                                                                       | IN, USA |
|             | <i>qaT3-11</i>                  | 6  | S_161454721 | 86.6  | 0.01 | 21.68 | *                                                                                                                                       | IN, USA |
|             | <i>qaT3-12</i>                  | 7  | S_84844392  | 49.3  | 0.03 | 66.87 | *                                                                                                                                       | IN, USA |
|             | <i>qaT3-13</i>                  | 7  | S_171757675 | 121.1 | 0.01 | 26.28 | *                                                                                                                                       | IN, USA |
|             | <i>qaT3-14</i>                  | 8  | S_173864256 | 129.7 | 0.01 | 20.60 | *                                                                                                                                       | IN, USA |
|             | <i>qaT3-15</i>                  | 9  | S_87459733  | 46.3  | 0.03 | 65.31 | *                                                                                                                                       | IN, USA |
|             | <i>qaT3-16</i>                  | 10 | S_94411157  | 24.8  | 0.02 | 29.26 | *                                                                                                                                       | IN, USA |
|             | <i>qaT3-17</i>                  | 10 | S_113911262 | 45.4  | 0.01 | 22.83 | Arogenate/prephenate dehydratase                                                                                                        | IN, USA |
| $\delta$ T3 | <i>q<math>\delta</math>T3-1</i> | 1  | S_5804545   | 10.2  | 0.02 | 41.07 | *                                                                                                                                       | IN, USA |
|             | <i>q<math>\delta</math>T3-2</i> | 1  | S_16005600  | 32.0  | 0.01 | 21.51 | *                                                                                                                                       | IN, USA |
|             | <i>q<math>\delta</math>T3-3</i> | 1  | S_174102804 | 94.3  | 0.02 | 49.72 | MPBQ/MSBQ methyl transferase (VTE3)                                                                                                     | IN, USA |
|             | <i>q<math>\delta</math>T3-4</i> | 1  | S_227978512 | 134.4 | 0.01 | 27.05 | *                                                                                                                                       | IN, USA |
|             | <i>q<math>\delta</math>T3-5</i> | 1  | S_289692611 | 185.1 | 0.01 | 19.76 | *                                                                                                                                       | IN, USA |
|             | <i>q<math>\delta</math>T3-6</i> | 3  | S_58294211  | 57.6  | 0.01 | 21.73 | 1-deoxy-D-xylulose 5-phosphate reductoisomerase, geranylgeranyl hydrogenase, shikimate biosynthesis protein aroDE                       | IN, USA |
|             | <i>q<math>\delta</math>T3-7</i> | 3  | S_201306180 | 106.7 | 0.01 | 18.79 | *                                                                                                                                       | IN, USA |
|             | <i>q<math>\delta</math>T3-8</i> | 4  | S_86504397  | 57.6  | 0.01 | 32.72 | Chorismate mutase                                                                                                                       | IN, USA |
|             | <i>q<math>\delta</math>T3-9</i> | 5  | S_1491318   | 1.7   | 0.01 | 35.45 | *                                                                                                                                       | IN, USA |

|                |                    |    |             |       |      |        |                                                                                                                               |         |
|----------------|--------------------|----|-------------|-------|------|--------|-------------------------------------------------------------------------------------------------------------------------------|---------|
| <b>γT3</b>     | <i>qδT3-10</i>     | 5  | S_18348509  | 48.9  | 0.01 | 19.19  | *                                                                                                                             | IN, USA |
|                | <i>qδT3-11</i>     | 5  | S_83712444  | 68.5  | 0.11 | 182.20 | 4-hydroxyphenylpyruvate dioxygenase                                                                                           | IN, USA |
|                | <i>qδT3-12</i>     | 5  | S_204809285 | 114.0 | 0.03 | 71.91  | *                                                                                                                             | IN, USA |
|                | <i>qδT3-13</i>     | 6  | S_72953671  | 10.1  | 0.03 | 60.38  | *                                                                                                                             | IN, USA |
|                | <i>qδT3-14</i>     | 6  | S_111902384 | 36.5  | 0.01 | 26.36  | *                                                                                                                             | IN, USA |
|                | <i>qδT3-15</i>     | 6  | S_160013836 | 84.0  | 0.01 | 21.96  | *                                                                                                                             | IN, USA |
|                | <i>qδT3-16</i>     | 7  | S_13934903  | 40.5  | 0.06 | 65.80  | 1-deoxy-D-xylulose 5-phosphate synthase 2 (dxs2)                                                                              | IN, USA |
|                | <i>qδT3-17</i>     | 7  | S_31773777  | 48.0  | 0.07 | 72.38  | *                                                                                                                             | IN, USA |
|                | <i>qδT3-18</i>     | 8  | S_144742598 | 73.5  | 0.01 | 20.71  | *                                                                                                                             | IN, USA |
|                | <i>qδT3-19</i>     | 8  | S_173232589 | 128.0 | 0.01 | 24.20  | Chorismate mutase, chorismate mutase                                                                                          | IN, USA |
|                | <i>qδT3-20</i>     | 9  | S_92175763  | 47.0  | 0.24 | ####   | Homogentisic acid geranylgeranyl transferase 1 (HGGT1)                                                                        | IN, USA |
|                | <i>qδT3-21</i>     | 10 | S_16505881  | 33.3  | 0.01 | 28.96  | *                                                                                                                             | IN, USA |
|                | <i>qγT3-1</i>      | 1  | S_77561162  | 79.9  | 0.02 | 52.52  | *                                                                                                                             | IN, USA |
|                | <i>qγT3-2</i>      | 1  | S_228086777 | 134.5 | 0.01 | 16.61  | *                                                                                                                             | IN, USA |
|                | <i>qγT3-3</i>      | 2  | S_39891173  | 67.5  | 0.01 | 18.26  | Arogenate/prephenate dehydratase                                                                                              | IN, USA |
|                | <i>qγT3-4</i>      | 3  | S_122684562 | 59.5  | 0.01 | 19.08  | *                                                                                                                             | IN, USA |
|                | <i>qγT3-5</i>      | 4  | S_40700355  | 54    | 0.01 | 31.41  | *                                                                                                                             | IN, USA |
|                | <i>qγT3-6</i>      | 5  | S_22579093  | 52.6  | 0.01 | 19.40  | *                                                                                                                             | IN, USA |
|                | <i>qγT3-7</i>      | 5  | S_84251695  | 68.6  | 0.08 | 144.13 | 4-hydroxyphenylpyruvate dioxygenase                                                                                           | IN, USA |
|                | <i>qγT3-8</i>      | 5  | S_200356718 | 106.8 | 0.04 | 100.56 | Gamma-tocopherol methyltransferase (VTE4)                                                                                     | IN, USA |
|                | <i>qγT3-9</i>      | 6  | S_82648835  | 11.5  | 0.03 | 64.73  | Arogenate/prephenate dehydrogenase family protein                                                                             | IN, USA |
|                | <i>qγT3-10</i>     | 6  | S_132730267 | 51.1  | 0.01 | 25.92  | ABC kinase (tocopherol cyclase kinase)                                                                                        | IN, USA |
|                | <i>qγT3-11</i>     | 7  | S_14043551  | 40.6  | 0.05 | 139.07 | 1-deoxy-D-xylulose 5-phosphate synthase 2 (dxs2)                                                                              | IN, USA |
|                | <i>qγT3-12</i>     | 8  | S_173232589 | 128   | 0.01 | 25.49  | Chorismate mutase, chorismate mutase                                                                                          | IN, USA |
|                | <i>qγT3-13</i>     | 9  | S_92175763  | 47    | 0.40 | 731.30 | Homogentisic acid geranylgeranyl transferase 1 (HGGT1)                                                                        | IN, USA |
|                | <i>qγT3-14</i>     | 10 | S_14819626  | 32.4  | 0.01 | 27.47  | *                                                                                                                             | IN, USA |
| <b>TotalT3</b> | <i>qTotalT3-1</i>  | 1  | S_77561162  | 79.9  | 0.01 | 23.29  | *                                                                                                                             | IN, USA |
|                | <i>qTotalT3-2</i>  | 2  | S_40196483  | 67.7  | 0.01 | 19.61  | *                                                                                                                             | IN, USA |
|                | <i>qTotalT3-3</i>  | 3  | S_144813964 | 63.8  | 0.01 | 20.20  | shikimate biosynthesis protein aroDE, shikimate biosynthesis protein aroDE                                                    | IN, USA |
|                | <i>qTotalT3-4</i>  | 4  | S_40700355  | 54    | 0.01 | 32.35  | *                                                                                                                             | IN, USA |
|                | <i>qTotalT3-5</i>  | 5  | S_59819753  | 62.8  | 0.02 | 17.36  | Arogenate/prephenate dehydrogenase family protein, Arogenate/prephenate dehydrogenase family protein                          | IN, USA |
|                | <i>qTotalT3-6</i>  | 5  | S_84251695  | 68.6  | 0.10 | 82.46  | 4-hydroxyphenylpyruvate dioxygenase                                                                                           | IN, USA |
|                | <i>qTotalT3-7</i>  | 6  | S_82648835  | 11.5  | 0.03 | 57.91  | Arogenate/prephenate dehydrogenase family protein                                                                             | IN, USA |
|                | <i>qTotalT3-8</i>  | 6  | S_132730267 | 51.1  | 0.01 | 19.26  | 1-deoxy-D-xylulose 5-phosphate synthase 1 (dxs1), isopentenyl pyrophosphate isomerase, ABC kinase (tocopherol cyclase kinase) | IN, USA |
|                | <i>qTotalT3-9</i>  | 7  | S_13934903  | 40.5  | 0.06 | 123.32 | 1-deoxy-D-xylulose 5-phosphate synthase 2 (dxs2)                                                                              | IN, USA |
|                | <i>qTotalT3-10</i> | 8  | S_170044134 | 114.2 | 0.01 | 25.70  |                                                                                                                               | IN, USA |
|                | <i>qTotalT3-11</i> | 9  | S_92175763  | 47    | 0.39 | ####   | Homogentisic acid geranylgeranyl transferase 1 (HGGT1)                                                                        | IN, USA |

|                                                          |                                         |    |             |             |       |        |                                                                                           |         |
|----------------------------------------------------------|-----------------------------------------|----|-------------|-------------|-------|--------|-------------------------------------------------------------------------------------------|---------|
| TotalT+T3                                                | <i>qTotalT3-12</i>                      | 10 | S_108093611 | 43.9        | 0.01  | 28.52  | Arogenate/prephenate dehydratase                                                          | IN, USA |
|                                                          | <i>qTotalT+T3-1</i>                     | 1  | S_32578218  | 51.6        | 0.02  | 26.56  | Chorismate synthase                                                                       | IN, USA |
|                                                          | <i>qTotalT+T3-2</i>                     | 1  | S_173178805 | 94          | 0.01  | 23.62  | 3-deoxy-d-arabino-heptulosonate 7-phosphate synthase, MPBQ/MSBQ methyl transferase (VTE3) | IN, USA |
|                                                          | <i>qTotalT+T3-3</i>                     | 1  | S_228086777 | 134.5       | 0.06  | 94.22  | *                                                                                         | IN, USA |
|                                                          | <i>qTotalT+T3-4</i>                     | 2  | S_185246926 | 92.1        | 0.01  | 18.60  | *                                                                                         | IN, USA |
|                                                          | <i>qTotalT+T3-5</i>                     | 2  | S_210003103 | 115.7       | 0.04  | 62.49  | *                                                                                         | IN, USA |
|                                                          | <i>qTotalT+T3-6</i>                     | 3  | S_181011607 | 90.8        | 0.01  | 19.65  | *                                                                                         | IN, USA |
|                                                          | <i>qTotalT+T3-7</i>                     | 4  | S_41538292  | 54.1        | 0.02  | 42.65  | *                                                                                         | IN, USA |
|                                                          | <i>qTotalT+T3-8</i>                     | 5  | S_2437804   | 5.4         | 0.01  | 17.91  | *                                                                                         | IN, USA |
|                                                          | <i>qTotalT+T3-9</i>                     | 5  | S_25247319  | 54.1        | 0.12  | 138.56 | *                                                                                         | IN, USA |
|                                                          | <i>qTotalT+T3-10</i>                    | 5  | S_84885005  | 68.7        | 0.03  | 41.03  | Chorismate mutase, 4-hydroxyphenylpyruvate dioxygenase                                    | IN, USA |
|                                                          | <i>qTotalT+T3-11</i>                    | 5  | S_204322970 | 111.9       | 0.01  | 17.58  | *                                                                                         | IN, USA |
|                                                          | <i>qTotalT+T3-12</i>                    | 6  | S_75052175  | 10.3        | 0.01  | 22.55  | Arogenate/prephenate dehydrogenase family protein                                         | IN, USA |
|                                                          | <i>qTotalT+T3-13</i>                    | 6  | S_109778922 | 32.8        | 0.02  | 16.99  | *                                                                                         | IN, USA |
|                                                          | <i>qTotalT+T3-14</i>                    | 6  | S_127663433 | 47.2        | 0.02  | 20.89  | *                                                                                         | IN, USA |
|                                                          | <i>qTotalT+T3-15</i>                    | 7  | S_10636101  | 35.4        | 0.02  | 46.30  | 1-deoxy-D-xylulose 5-phosphate synthase 2 (dxs2)                                          | IN, USA |
|                                                          | <i>qTotalT+T3-16</i>                    | 8  | S_9998058   | 25.7        | 0.01  | 18.23  | *                                                                                         | IN, USA |
|                                                          | <i>qTotalT+T3-17</i>                    | 8  | S_143642609 | 72.8        | 0.01  | 26.14  | *                                                                                         | IN, USA |
|                                                          | <i>qTotalT+T3-18</i>                    | 9  | S_94016922  | 47.3        | 0.09  | 153.24 | Homogentisic acid geranylgeranyl transferase 1 (HGGT1)                                    | IN, USA |
| PC-8                                                     | <i>qTotalT+T3-19</i>                    | 10 | S_14993749  | 32.5        | 0.01  | 25.88  | *                                                                                         | IN, USA |
|                                                          | <i>qTotalT+T3-20</i>                    | 10 | S_145163581 | 83.8        | 0.01  | 25.53  | *                                                                                         | IN, USA |
|                                                          | <i>qPC-8-1</i>                          | 1  | S_11167845  | 22.2        | 0.02  | 23.47  | Solanesyl diphosphate synthase                                                            | IN, USA |
|                                                          | <i>qPC-8-2</i>                          | 2  | S_219507883 | 129.3       | 0.01  | 15.01  | *                                                                                         | IN, USA |
|                                                          | <i>qPC-8-3</i>                          | 3  | S_161788660 | 73.3        | 0.02  | 25.03  | *                                                                                         | IN, USA |
|                                                          | <i>qPC-8-4</i>                          | 5  | S_1824267   | 2.6         | 0.01  | 16.61  | *                                                                                         | IN, USA |
|                                                          | <i>qPC-8-5</i>                          | 5  | S_140093904 | 71.2        | 0.04  | 42.15  | Chorismate mutase, tocopherol cyclase (VTE1)                                              | IN, USA |
|                                                          | <i>qPC-8-6</i>                          | 6  | S_165195245 | 101.9       | 0.03  | 36.09  | *                                                                                         | IN, USA |
|                                                          | <i>qPC-8-7</i>                          | 7  | S_14912737  | 41.4        | 0.04  | 42.78  | 1-deoxy-D-xylulose 5-phosphate synthase 2 (dxs2)                                          | IN, USA |
|                                                          | <i>qPC-8-8</i>                          | 9  | S_20333901  | 36.1        | 0.03  | 30.03  | 1-deoxy-D-xylulose 5-phosphate synthase 3 (dxs3)                                          | IN, USA |
| QTL Identified in the N6 by NC296 RIL population (n=213) |                                         |    |             |             |       |        |                                                                                           |         |
| $\delta T/\alpha T$                                      | <i>q\delta T/\alpha T</i>               | 1  | *           | 18.8–23.9   | 4.60  | 2.61   | *                                                                                         | IN, USA |
| $\delta T3$                                              | <i>q\delta T3</i>                       | 1  | *           | 28.9–34.2   | 4.46  | 1.24   | *                                                                                         | IN, USA |
| $TT$                                                     | <i>qTT</i>                              | 1  | *           | 28.8–35     | 4.42  | 2.31   | *                                                                                         | IN, USA |
| $TT3$                                                    | <i>qTT3</i>                             | 1  | *           | 112.5–121.5 | 3.98  | 4.62   | *                                                                                         | IN, USA |
| $\alpha T/\gamma T$                                      | <i>q\alpha T/\gamma T</i>               | 5  | *           | 42.3–47     | 7.33  | 4.57   | *                                                                                         | IN, USA |
| $\delta T$                                               | <i>q\delta T</i>                        | 5  | *           | 46.9–50     | 7.84  | 20.20  | <i>ZmVTE4</i>                                                                             | IN, USA |
| $\gamma T$                                               | <i>q\gamma T</i>                        | 5  | *           | 47.9–49.6   | 12.48 | 24.97  | <i>ZmVTE4</i>                                                                             | IN, USA |
| $\gamma T/(\gamma T+\alpha T)$                           | <i>q\gamma T/(\gamma T+\alpha T)</i>    | 5  | *           | 47.9–49.3   | 30.07 | 52.85  | <i>ZmVTE4</i>                                                                             | IN, USA |
| $\delta T/\alpha T$                                      | <i>q\delta T/\alpha T</i>               | 5  | *           | 50–53.1     | 4.87  | 13.29  | *                                                                                         | IN, USA |
| $\delta T/(\gamma T+\alpha T)$                           | <i>q\delta T/(\gamma T+\alpha T)</i>    | 5  | *           | 56.1–60.2   | 5.13  | 12.98  | *                                                                                         | IN, USA |
| $\alpha T3/\gamma T3$                                    | <i>q\alpha T3/\gamma T3</i>             | 5  | *           | 56.6–60.9   | 12.49 | 19.80  | *                                                                                         | IN, USA |
| $\gamma T3/(\gamma T3+\alpha T3)$                        | <i>q\gamma T3/(\gamma T3+\alpha T3)</i> | 5  | *           | 57.7–60.9   | 15.75 | 26.56  | *                                                                                         | IN, USA |
| $\alpha T3$                                              | <i>q\alpha T3</i>                       | 5  | *           | 59.8–63.9   | 6.43  | 13.97  | *                                                                                         | IN, USA |

(Fenton et al., 2018)

|                                                                    |                       |   |   |             |       |       |                |         |
|--------------------------------------------------------------------|-----------------------|---|---|-------------|-------|-------|----------------|---------|
| <b>TT+TT3</b>                                                      | <i>qTT+TT3</i>        | 5 | * | 75.6–78.6   | 3.98  | 7.01  | *              | IN, USA |
| <b>δT3/(γT3+αT3)</b>                                               | <i>qδT3/(γT3+αT3)</i> | 5 | * | 83.4–86.4   | 4.54  | 8.90  | *              | IN, USA |
| <b>δT3/γT3</b>                                                     | <i>qδT3/γT3</i>       | 5 | * | 83.4–86.4   | 4.54  | 8.90  | *              | IN, USA |
| <b>γT</b>                                                          | <i>qγT</i>            | 5 | * | 99.4–102.5  | 11.93 | 25.65 | *              | IN, USA |
| <b>αT</b>                                                          | <i>qαT</i>            | 5 | * | 95.9–103.6  | 4.39  | 5.53  | *              | IN, USA |
| <b>TT3</b>                                                         | <i>qTT3</i>           | 5 | * | 98.8–103.5  | 12.17 | 23.70 | *              | IN, USA |
| <b>TT/TT3</b>                                                      | <i>qTT/TT3</i>        | 5 | * | 100.8–107.4 | 10.53 | 16.40 | *              | IN, USA |
| <b>δT/γT</b>                                                       | <i>qδT/γT</i>         | 6 | * | 57.7–59     | 4.64  | 6.15  | *              | IN, USA |
| <b>TT+TT3</b>                                                      | <i>qTT+TT3</i>        | 7 | * | 66.6–72.5   | 5.07  | 2.04  | *              | IN, USA |
| <b>γT3</b>                                                         | <i>qγT3</i>           | 7 | * | 69.6–72.2   | 6.63  | 0.78  | *              | IN, USA |
| <b>TT</b>                                                          | <i>qTT</i>            | 7 | * | 69.4–73.9   | 5.98  | 2.46  | *              | IN, USA |
| <b>γT3/(γT3+αT3)</b>                                               | <i>qγT3/(γT3+αT3)</i> | 9 | * | 51.9–55.9   | 13.54 | 19.58 | *              | IN, USA |
| <b>αT3/γT3</b>                                                     | <i>qαT3/γT3</i>       | 9 | * | 56.2–59.3   | 9.37  | 14.16 | *              | IN, USA |
| <b>TT3</b>                                                         | <i>qTT3</i>           | 9 | * | 62.8–65.6   | 14.83 | 21.67 | <i>ZmVTE2</i>  | IN, USA |
| <b>TT/TT3</b>                                                      | <i>qTT/TT3</i>        | 9 | * | 61–65.4     | 8.24  | 8.01  | <i>ZmVTE2</i>  | IN, USA |
| <b>δT3</b>                                                         | <i>qδT3</i>           | 9 | * | 67–74.8     | 8.14  | 17.32 | <i>ZmHGGT1</i> | IN, USA |
| <b>δT3/(γT3+αT3)</b>                                               | <i>qδT3/(γT3+αT3)</i> | 9 | * | 68.4–73.5   | 11.71 | 25.05 | <i>ZmHGGT1</i> | IN, USA |
| <b>δT3/γT3</b>                                                     | <i>qδT3/γT3</i>       | 9 | * | 68.4–73.5   | 11.71 | 25.05 | <i>ZmHGGT1</i> | IN, USA |
| <b>QTL Identified in the E2558 by Co125 RIL population (n=197)</b> |                       |   |   |             |       |       |                |         |
| <b>αT/γT</b>                                                       | <i>qαT/γT</i>         | 1 | * | 80.7–82.9   | 2.94  | 0.10  | *              | IN, USA |
| <b>αT</b>                                                          | <i>qαT</i>            | 1 | * | 100.2–104.2 | 4.45  | 0.39  | *              | IN, USA |
| <b>γT3</b>                                                         | <i>qγT3</i>           | 1 | * | 100.3–103.9 | 4.24  | 0.66  | *              | IN, USA |
| <b>TT+TT3</b>                                                      | <i>qTT+TT3</i>        | 1 | * | 99.7–105    | 2.84  | 0.10  | *              | IN, USA |
| <b>δT3/γT3</b>                                                     | <i>qδT3/γT3</i>       | 1 | * | 158.7–163.8 | 2.63  | 0.38  | *              | IN, USA |
| <b>TT</b>                                                          | <i>qTT</i>            | 2 | * | 33.3–38.5   | 3.03  | 3.74  | *              | IN, USA |
| <b>αT3/γT3</b>                                                     | <i>qαT3/γT3</i>       | 2 | * | 46.5–49.6   | 5.57  | 16.51 | *              | IN, USA |
| <b>αT3/γT3</b>                                                     | <i>qαT3/γT3</i>       | 2 | * | 55.7–59.2   | 2.84  | 2.41  | *              | IN, USA |
| <b>αT3/γT3</b>                                                     | <i>qαT3/γT3</i>       | 3 | * | 51.6–56.5   | 3.01  | 3.03  | *              | IN, USA |
| <b>δT</b>                                                          | <i>qδT</i>            | 3 | * | 62.5–65.6   | 6.27  | 8.26  | *              | IN, USA |
| <b>δT(γT+αT)</b>                                                   | <i>qδT(γT+αT)</i>     | 3 | * | 62.4–65.7   | 5.29  | 7.63  | *              | IN, USA |
| <b>δT/γT</b>                                                       | <i>qδT/γT</i>         | 3 | * | 63–65.6     | 5.67  | 5.71  | *              | IN, USA |
| <b>δT/αT</b>                                                       | <i>qδT/αT</i>         | 4 | * | 33.8–39     | 3.03  | 0.10  | *              | IN, USA |
| <b>TT/TT3</b>                                                      | <i>qTT/TT3</i>        | 5 | * | 35.7–37.3   | 3.53  | 9.94  | *              | IN, USA |
| <b>δT3(γT3+αT3)</b>                                                | <i>qδT3(γT3+αT3)</i>  | 5 | * | 44.4–47.9   | 3.36  | 2.31  | *              | IN, USA |
| <b>δT/γT</b>                                                       | <i>qδT/γT</i>         | 5 | * | 47.2–51     | 9.63  | 18.53 | <i>ZmVTE4</i>  | IN, USA |
| <b>αT/γT</b>                                                       | <i>qαT/γT</i>         | 5 | * | 49.1–52.2   | 6.96  | 15.68 | <i>ZmVTE4</i>  | IN, USA |
| <b>αT</b>                                                          | <i>qαT</i>            | 5 | * | 49.4–58.8   | 2.92  | 2.99  | *              | IN, USA |
| <b>δT/γT</b>                                                       | <i>qδT/γT</i>         | 5 | * | 58.9–62.1   | 2.92  | 7.92  | *              | IN, USA |
| <b>αT3/γT3</b>                                                     | <i>qαT3/γT3</i>       | 5 | * | 69.4–74.3   | 3.86  | 6.43  | <i>ZmVTE1</i>  | IN, USA |
| <b>δT3</b>                                                         | <i>qδT3</i>           | 5 | * | 69.2–71.7   | 2.68  | 1.41  | <i>ZmVTE1</i>  | IN, USA |
| <b>TT+TT3</b>                                                      | <i>qTT+TT3</i>        | 5 | * | 72–78.4     | 7.63  | 9.74  | *              | IN, USA |
| <b>δT</b>                                                          | <i>qδT</i>            | 5 | * | 74–78.9     | 4.89  | 3.25  | <i>ZmHPPD1</i> | IN, USA |
| <b>TT3</b>                                                         | <i>qTT3</i>           | 5 | * | 73.3–85.3   | 2.61  | 6.69  | <i>ZmHPPD1</i> | IN, USA |
| <b>αT3/γT3</b>                                                     | <i>qαT3/γT3</i>       | 5 | * | 86.2–92.1   | 5.45  | 6.92  | *              | IN, USA |
| <b>δT(γT+αT)</b>                                                   | <i>qδT(γT+αT)</i>     | 5 | * | 105.9–109.6 | 3.36  | 4.35  | *              | IN, USA |
| <b>γT</b>                                                          | <i>qγT</i>            | 6 | * | 12.4–14.4   | 2.69  | 4.39  | *              | IN, USA |
| <b>γT/(γT+αT)</b>                                                  | <i>qγT/(γT+αT)</i>    | 6 | * | 12.4–14.4   | 2.69  | 4.39  | *              | IN, USA |
| <b>γT3/(γT3+αT3)</b>                                               | <i>qγT3/(γT3+αT3)</i> | 7 | * | 57.5–64.2   | 2.75  | 7.05  | *              | IN, USA |
| <b>γT</b>                                                          | <i>qγT</i>            | 7 | * | 57.1–64.2   | 2.58  | 5.63  | *              | IN, USA |
| <b>TT3</b>                                                         | <i>qTT3</i>           | 8 | * | 57.9–62.9   | 2.70  | 5.28  | *              | IN, USA |
| <b>δT/αT</b>                                                       | <i>qδT/αT</i>         | 8 | * | 57.8–66     | 2.52  | 2.45  | *              | IN, USA |

|                                                               |                                    |    |   |               |       |       |                      |         |
|---------------------------------------------------------------|------------------------------------|----|---|---------------|-------|-------|----------------------|---------|
| $\alpha T/\gamma T$                                           | $qaT/\gamma T$                     | 9  | * | 50.4–56.5     | 3.99  | 15.26 | *                    | IN, USA |
| $\delta T3/\gamma T3$                                         | $q\delta T3/\gamma T3$             | 9  | * | 52.2–53.2     | 21.95 | 38.95 | *                    | IN, USA |
| $TT+TT3$                                                      | $qTT+TT3$                          | 9  | * | 54.9–55.8     | 18.48 | 26.87 | *                    | IN, USA |
| $\delta T/\alpha T$                                           | $q\delta T/\alpha T$               | 9  | * | 54.2–55.4     | 10.98 | 13.96 | *                    | IN, USA |
| $\delta T3/\alpha T3$                                         | $q\delta T3/\alpha T3$             | 9  | * | 53.5–58.8     | 7.91  | 13.52 | *                    | IN, USA |
| $\alpha T/\gamma T$                                           | $qaT/\gamma T$                     | 9  | * | 54–57.6       | 13.04 | 22.98 | *                    | IN, USA |
| $\delta T$                                                    | $q\delta T$                        | 9  | * | 54.1–56.5     | 7.82  | 18.41 | *                    | IN, USA |
| $\gamma T$                                                    | $q\gamma T$                        | 9  | * | 55.1–55.9     | 57.19 | 29.45 | *                    | IN, USA |
| $\gamma T/(\gamma T+\alpha T)$                                | $q\gamma T/(\gamma T+\alpha T)$    | 9  | * | 55.1–55.9     | 57.19 | 29.45 | *                    | IN, USA |
| $\gamma T3/(\gamma T3+\alpha T3)$                             | $q\gamma T3/(\gamma T3+\alpha T3)$ | 9  | * | 55.5–57.8     | 12.65 | 39.15 | *                    | IN, USA |
| $\delta T3(\gamma T3+\alpha T3)$                              | $q\delta T3(\gamma T3+\alpha T3)$  | 9  | * | 55.5–57.8     | 23.53 | 63.74 | *                    | IN, USA |
| $\delta T3$                                                   | $q\delta T3$                       | 9  | * | 56.5–60       | 42.26 | 74.09 | <i>ZmHGGT1</i>       | IN, USA |
| $\gamma T3$                                                   | $q\gamma T3$                       | 9  | * | 56.5–60       | 36.46 | 65.11 | <i>ZmHGGT1</i>       | IN, USA |
| $TT$                                                          | $qTT$                              | 9  | * | 56.5–58.8     | 13.02 | 21.44 | *                    | IN, USA |
| $\alpha T3$                                                   | $qaT3$                             | 9  | * | 56.5–61       | 2.81  | 6.32  | <i>ZmHGGT1</i>       | IN, USA |
| $TT3$                                                         | $qTT3$                             | 9  | * | 56.7–58.8     | 10.34 | 24.43 | *                    | IN, USA |
| $TT+TT3$                                                      | $qTT+TT3$                          | 9  | * | 56.5–61       | 3.18  | 0.10  | <i>ZmHGGT1</i>       | IN, USA |
| $\alpha T3/\gamma T3$                                         | $qaT3/\gamma T3$                   | 9  | * | 59–60.3       | 62.60 | 29.63 | <i>ZmHGGT1</i>       | IN, USA |
| $\gamma T/(\gamma T+\alpha T)$                                | $q\gamma T/(\gamma T+\alpha T)$    | 9  | * | 59–60.3       | 62.60 | 29.63 | <i>ZmHGGT1</i>       | IN, USA |
| $\gamma T3/(\gamma T3+\alpha T3)$                             | $q\gamma T3/(\gamma T3+\alpha T3)$ | 9  | * | 59–63         | 13.42 | 4.08  | <i>ZmHGGT1</i>       | IN, USA |
| $\delta T3/\gamma T3$                                         | $q\delta T3/\gamma T3$             | 9  | * | 67.9–72       | 2.84  | 0.45  | *                    | IN, USA |
| $\delta T3$                                                   | $q\delta T3$                       | 9  | * | 71.5–73.2     | 6.80  | 5.43  | *                    | IN, USA |
| $\gamma T/(\gamma T+\alpha T)$                                | $q\gamma T/(\gamma T+\alpha T)$    | 9  | * | 99–104.4      | 2.98  | 1.33  | *                    | IN, USA |
| $\delta T3/\gamma T3$                                         | $q\delta T3/\gamma T3$             | 10 | * | 44.7–48.5     | 3.63  | 0.10  | *                    | IN, USA |
| $\gamma T3/(\gamma T3+\alpha T3)$                             | $q\gamma T3/(\gamma T3+\alpha T3)$ | 10 | * | 52–55         | 3.42  | 2.85  | *                    | IN, USA |
| $\alpha T3$                                                   | $qaT3$                             | 10 | * | 51.6–56.1     | 2.99  | 3.01  | *                    | IN, USA |
| <b>QTL Identified in one or more of the 6 RIL populations</b> |                                    |    |   |               |       |       |                      |         |
| AT                                                            | $qAT$                              | 1  | * | 2.93–3.41     | 3.91  | 9.06  | *                    | China   |
| GT                                                            | $qGT$                              | 1  | * | 6.95–10.06    | 3.85  | 7.48  | <i>GRMZM2G112728</i> | China   |
| TT                                                            | $qTT$                              | 1  | * | 7.43–9.81     | 4.81  | 9.3   | *                    | China   |
| DT                                                            | $qDT$                              | 1  | * | 6.25–11.39    | 3.58  | 6.23  | *                    | China   |
| GT                                                            | $qGT$                              | 1  | * | 12.13–21.50   | 3.17  | 2.86  | *                    | China   |
| TT                                                            | $qTT$                              | 1  | * | 22.38–46.68   | 3.49  | 3.6   | <i>GRMZM2G164562</i> | China   |
| GT                                                            | $qGT$                              | 1  | * | 27.80–56.89   | 3.58  | 4.89  | <i>GRMZM2G141273</i> | China   |
| TT                                                            | $qTT$                              | 1  | * | 30.20–58.46   | 4.85  | 6.92  | *                    | China   |
| AT                                                            | $qAT$                              | 1  | * | 51.01–76.87   | 6.98  | 11.58 | <i>GRMZM2G396212</i> | China   |
| DT                                                            | $qDT$                              | 1  | * | 84.63–142.37  | 3.75  | 6.53  | <i>GRMZM2G359822</i> | China   |
| DT                                                            | $qDT$                              | 1  | * | 98.16–174.37  | 7.17  | 13.12 | <i>GRMZM2G082998</i> | China   |
| TT                                                            | $qTT$                              | 1  | * | 213.57–234.79 | 3.52  | 6.6   | *                    | China   |
| DT                                                            | $qDT$                              | 1  | * | 223.76–235.46 | 4.42  | 7.65  | *                    | China   |
| AT                                                            | $qAT$                              | 1  | * | 224.38–230.83 | 7.28  | 8.91  | *                    | China   |
| GT                                                            | $qGT$                              | 1  | * | 225.04–228.30 | 26.19 | 34.29 | *                    | China   |
| TT                                                            | $qTT$                              | 1  | * | 226.14–228.72 | 24.98 | 36.34 | *                    | China   |
| RT                                                            | $qRT$                              | 1  | * | 251.16–262.40 | 3.59  | 6.61  | <i>GRMZM2G448446</i> | China   |
| AT                                                            | $qAT$                              | 1  | * | 253.09–273.45 | 4.48  | 8.27  | <i>GRMZM2G027059</i> | China   |
| RT                                                            | $qRT$                              | 1  | * | 273.4–285.13  | 3.97  | 7.09  | *                    | China   |
| AT                                                            | $qAT$                              | 1  | * | 286.51–292.13 | 3.65  | 7.63  | <i>GRMZM2G156516</i> | China   |
| AT                                                            | $qAT$                              | 1  | * | 287.71–298.05 | 3.15  | 5.01  | *                    | China   |
| GT                                                            | $qGT$                              | 2  | * | 30.19–69.18   | 3.26  | 4.16  | <i>GRMZM2G437912</i> | China   |
| GT                                                            | $qGT$                              | 2  | * | 34.67–114.20  | 3.05  | 4     | *                    | China   |
| DT                                                            | $qDT$                              | 2  | * | 77.70–181.42  | 3.22  | 6.7   | <i>GRMZM2G466543</i> | China   |

(Wang et al., 2018)

|    |     |   |   |               |       |       |                  |       |
|----|-----|---|---|---------------|-------|-------|------------------|-------|
| AT | qAT | 2 | * | 208.21-222.47 | 3.13  | 3.98  | GRMZM2G113476    | China |
| DT | qDT | 2 | * | 203.15-222.30 | 4.81  | 8.59  | AC194970.5 FG001 | China |
| RT | qRT | 2 | * | 212.54-218.46 | 8.29  | 15.8  | *                | China |
| GT | qGT | 3 | * | 9.04-22.39    | 3.74  | 7.08  | GRMZM2G056975    | China |
| GT | qGT | 3 | * | 22.00-48.81   | 4.25  | 6     | GRMZM2G419111    | China |
| AT | qAT | 3 | * | 162.15-210.52 | 4.49  | 8.91  | GRMZM5G856881    | China |
| RT | qRT | 3 | * | 220.40-227.70 | 3.03  | 4.48  | *                | China |
| RT | qRT | 3 | * | 223.91-227.41 | 4.44  | 8.37  | *                | China |
| GT | qGT | 4 | * | 2.86-5.83     | 5.62  | 7     | GRMZM2G006480    | China |
| AT | qAT | 4 | * | 175.27-186.06 | 4.53  | 7.4   | GRMZM2G161566    | China |
| DT | qDT | 4 | * | 181.23-189.61 | 4.18  | 8.9   | *                | China |
| GT | qGT | 5 | * | 2.28-5.90     | 3.21  | 6.33  | *                | China |
| DT | qDT | 5 | * | 15.14-25.39   | 4.42  | 9.4   | GRMZM2G454719    | China |
| GT | qGT | 5 | * | 19.34-25.05   | 26.79 | 46.56 | GRMZM2G084942    | China |
| RT | qRT | 5 | * | 19.67-25.39   | 7.41  | 12.05 | GRMZM2G085117    | China |
| TT | qTT | 5 | * | 22.10-24.71   | 29.47 | 48.69 | *                | China |
| AT | qAT | 5 | * | 22.10-24.71   | 13.56 | 19.99 | *                | China |
| RT | qRT | 5 | * | 19.68-26.56   | 6.55  | 9.32  | *                | China |
| TT | qTT | 5 | * | 18.67-43.42   | 7.83  | 11.44 | *                | China |
| GT | qGT | 5 | * | 14.84-49.80   | 6.3   | 8.61  | *                | China |
| GT | qGT | 5 | * | 20.49-29.99   | 11.92 | 19.11 | *                | China |
| TT | qTT | 5 | * | 21.42-29.92   | 12.89 | 21.78 | *                | China |
| DT | qDT | 5 | * | 18.54-51.43   | 3.1   | 6.47  | *                | China |
| DT | qDT | 5 | * | 14.02-69.30   | 3.24  | 5.26  | *                | China |
| DT | qDT | 5 | * | 63.32-81.27   | 5.77  | 10.87 | GRMZM2G477236    | China |
| GT | qGT | 5 | * | 191.37-200.60 | 11.87 | 13.08 | AC209374.4 FG002 | China |
| RT | qRT | 5 | * | 191.09-202.81 | 3.73  | 7.95  | GRMZM2G035213    | China |
| RT | qRT | 5 | * | 197.70-205.02 | 3.91  | 7.26  | GRMZM2G105644    | China |
| RT | qRT | 5 | * | 198.50-202.05 | 14.74 | 26.34 | GRMZM2G070218    | China |
| AT | qAT | 5 | * | 196.68-208.76 | 3.46  | 6.92  | *                | China |
| RT | qRT | 5 | * | 197.11-200.60 | 25.9  | 40.59 | *                | China |
| AT | qAT | 5 | * | 196.18-202.16 | 9.55  | 13.16 | *                | China |
| RT | qRT | 5 | * | 197.84-201.61 | 15.48 | 28.3  | *                | China |
| AT | qAT | 5 | * | 197.11-200.60 | 22.44 | 35.07 | *                | China |
| GT | qGT | 5 | * | 196.68-203.80 | 5.77  | 7.75  | *                | China |
| RT | qRT | 5 | * | 211.94-216.50 | 3.04  | 4.63  | *                | China |
| RT | qRT | 5 | * | 213.88-215.59 | 3.47  | 4.44  | *                | China |
| DT | qDT | 6 | * | 16.17-89.91   | 3.6   | 6.32  | GRMZM2G365961    | China |
| DT | qDT | 6 | * | 97.28-108.26  | 4.91  | 8.72  | *                | China |
| AT | qAT | 6 | * | 133.05-150.40 | 3.85  | 8.69  | GRMZM5G878070    | China |
| TT | qTT | 6 | * | 137.69-150.48 | 3.62  | 7.18  | GRMZM2G137151    | China |
| RT | qRT | 7 | * | 5.56-9.70     | 3.66  | 6.94  | *                | China |
| DT | qDT | 7 | * | 21.27-73.50   | 4.96  | 8.97  | GRMZM2G374213    | China |
| DT | qDT | 7 | * | 86.32-92.94   | 4.44  | 8.16  | *                | China |
| TT | qTT | 7 | * | 27.98-128.71  | 3.59  | 4.11  | *                | China |
| AT | qAT | 7 | * | 123.67-136.86 | 3.84  | 7.82  | GRMZM2G121546    | China |
| RT | qRT | 7 | * | 125.14-143.29 | 3.85  | 4.32  | *                | China |
| AT | qAT | 7 | * | 130.90-155.37 | 3.25  | 3.62  | *                | China |
| DT | qDT | 8 | * | 7.39-11.36    | 3.11  | 5.54  | GRMZM2G058404    | China |
| GT | qGT | 8 | * | 6.14-10.09    | 7     | 9.65  | GRMZM2G036290    | China |
| TT | qTT | 8 | * | 7.87-8.73     | 11.05 | 17.1  | *                | China |
| GT | qGT | 8 | * | 10.00-13.69   | 3.08  | 4.26  | *                | China |

|                                                             |        |    |                  |               |          |       |               |       |
|-------------------------------------------------------------|--------|----|------------------|---------------|----------|-------|---------------|-------|
| AT                                                          | qAT    | 8  | *                | 21.30-123.80  | 3.47     | 7.93  | GRMZM2G315125 | China |
| RT                                                          | qRT    | 8  | *                | 118.86-150.15 | 3.7      | 4.11  | *             | China |
| DT                                                          | qDT    | 8  | *                | 157.40-162.50 | 3.23     | 6.86  | *             | China |
| GT                                                          | qGT    | 8  | *                | 162.50-168.93 | 4.66     | 8.94  | GRMZM2G172032 | China |
| TT                                                          | qTT    | 8  | *                | 162.50-168.93 | 4.14     | 8.14  | *             | China |
| DT                                                          | qDT    | 8  | *                | 165.35-168.24 | 6.92     | 12.68 | *             | China |
| AT                                                          | qAT    | 9  | *                | 17.12-23.46   | 4.77     | 7.65  | GRMZM2G173641 | China |
| GT                                                          | qGT    | 9  | *                | 129.19-141.78 | 4.67     | 6.65  | GRMZM2G145451 | China |
| TT                                                          | qTT    | 9  | *                | 129.19-143.03 | 3.16     | 4.59  | GRMZM2G036861 | China |
| RT                                                          | qRT    | 10 | *                | 10.19-80.40   | 3.76     | 6.75  | GRMZM2G014376 | China |
| AT                                                          | qAT    | 10 | *                | 117.27-132.54 | 6.86     | 12.53 | *             | China |
| GT                                                          | qGT    | 10 | *                | 127.35-136.01 | 6.79     | 10.42 | *             | China |
| TT                                                          | qTT    | 10 | *                | 125.13-132.12 | 5.67     | 9.06  | *             | China |
| SNPs Identified by GWAS in the Association panel population |        |    |                  |               |          |       |               |       |
| AT                                                          | qAT-1  | 1  | chr1.S_3038971   | 3,038,971     | 4.87E-07 | *     | GRMZM2G436226 | China |
|                                                             | qAT-2  | 1  | chr1.S_4040365   | 4,040,365     | 1.47E-06 | *     | GRMZM2G013634 | China |
|                                                             | qAT-1  | 2  | chr2.S_136272058 | 136,272,058   | 5.03E-07 | *     | GRMZM2G043226 | China |
|                                                             | qAT-2  | 2  | chr2.S_136272060 | 136,272,060   | 5.03E-07 | *     | GRMZM2G043226 | China |
|                                                             | qAT-3  | 2  | chr2.S_136272061 | 136,272,061   | 5.03E-07 | *     | GRMZM2G043226 | China |
|                                                             | qAT-4  | 2  | chr2.S_136272084 | 136,272,084   | 5.03E-07 | *     | GRMZM2G043226 | China |
|                                                             | qAT-5  | 2  | chr2.S_136272140 | 136,272,140   | 5.03E-07 | *     | GRMZM2G043226 | China |
|                                                             | qAT-6  | 2  | chr2.S_136272141 | 136,272,141   | 5.03E-07 | *     | GRMZM2G043226 | China |
|                                                             | qAT-7  | 2  | chr2.S_136272169 | 136,272,169   | 5.03E-07 | *     | GRMZM2G043226 | China |
|                                                             | qAT-8  | 2  | chr2.S_136272394 | 136,272,394   | 5.23E-07 | *     | GRMZM2G043226 | China |
|                                                             | qAT-9  | 2  | chr2.S_136272396 | 136,272,396   | 5.23E-07 | *     | GRMZM2G043226 | China |
|                                                             | qAT-10 | 2  | chr2.S_136272403 | 136,272,403   | 5.14E-07 | *     | GRMZM2G043226 | China |
|                                                             | qAT-11 | 3  | chr3.S_2139263   | 2,139,263     | 5.23E-07 | *     | GRMZM2G170013 | China |
|                                                             | qAT-12 | 3  | chr3.S_232043044 | 232,043,044   | 1.47E-06 | *     | GRMZM5G875655 | China |
|                                                             | qAT-13 | 3  | chr3.S_232043153 | 232,043,153   | 1.47E-06 | *     | GRMZM5G875655 | China |
|                                                             | qAT-14 | 3  | chr3.S_232043402 | 232,043,402   | 1.47E-06 | *     | GRMZM5G875655 | China |
|                                                             | qAT-15 | 3  | chr3.S_232044135 | 232,044,135   | 1.63E-06 | *     | GRMZM5G875655 | China |
|                                                             | qAT-16 | 4  | chr4.S_201887561 | 201,887,561   | 6.58E-07 | *     | GRMZM2G000608 | China |
|                                                             | qAT-17 | 4  | chr4.S_239794450 | 239,794,450   | 6.95E-07 | *     | GRMZM2G150251 | China |
|                                                             | qAT-18 | 5  | chr5.S_90530346  | 90,530,346    | 1.28E-06 | *     | GRMZM2G046155 | China |
|                                                             | qAT-19 | 5  | chr5.S_196508571 | 196,508,571   | 2.40E-07 | *     | GRMZM2G022645 | China |
|                                                             | qAT-20 | 5  | chr5.S_196510693 | 196,510,693   | 4.99E-07 | *     | GRMZM2G022645 | China |
|                                                             | qAT-21 | 5  | chr5.S_196511036 | 196,511,036   | 1.35E-08 | *     | GRMZM2G022645 | China |
|                                                             | qAT-22 | 5  | chr5.S_198879413 | 198,879,413   | 4.30E-07 | *     | GRMZM2G413829 | China |
|                                                             | qAT-23 | 5  | chr5.S_198879415 | 198,879,415   | 4.30E-07 | *     | GRMZM2G413829 | China |
|                                                             | qAT-24 | 5  | chr5.S_199371029 | 199,371,029   | 1.09E-08 | *     | GRMZM2G376067 | China |
|                                                             | qAT-25 | 5  | chr5.S_199373005 | 199,373,005   | 1.09E-08 | *     | GRMZM2G376067 | China |
|                                                             | qAT-26 | 5  | chr5.S_199373231 | 199,373,231   | 1.09E-08 | *     | GRMZM2G376067 | China |
|                                                             | qAT-27 | 5  | chr5.S_199373289 | 199,373,289   | 1.09E-08 | *     | GRMZM2G376067 | China |
|                                                             | qAT-28 | 5  | chr5.S_199373414 | 199,373,414   | 4.41E-09 | *     | GRMZM2G376067 | China |
|                                                             | qAT-29 | 5  | chr5.S_199377626 | 199,377,626   | 1.09E-08 | *     | GRMZM2G027741 | China |
|                                                             | qAT-30 | 5  | chr5.S_199378010 | 199,378,010   | 1.09E-08 | *     | GRMZM2G027741 | China |
|                                                             | qAT-31 | 5  | chr5.S_199379904 | 199,379,904   | 1.09E-08 | *     | GRMZM2G027741 | China |
|                                                             | qAT-32 | 5  | chr5.S_199380227 | 199,380,227   | 1.09E-08 | *     | GRMZM2G027741 | China |
|                                                             | qAT-33 | 5  | chr5.S_199380407 | 199,380,407   | 2.15E-09 | *     | GRMZM2G027741 | China |
|                                                             | qAT-34 | 5  | PZE-105146513    | 199,647,442   | 3.82E-11 | *     | GRMZM5G823157 | China |
|                                                             | qAT-35 | 5  | chr5.S_200114897 | 200,114,897   | 6.01E-09 | *     | GRMZM2G108996 | China |



|        |   |                  |             |          |   |               |       |
|--------|---|------------------|-------------|----------|---|---------------|-------|
| qAT-36 | 5 | chr5.S_200114905 | 200,114,905 | 1.84E-06 | * | GRMZM2G108996 | China |
| qAT-37 | 5 | chr5.S_200114909 | 200,114,909 | 4.19E-07 | * | GRMZM2G108996 | China |
| qAT-38 | 5 | chr5.S_200114947 | 200,114,947 | 2.25E-09 | * | GRMZM2G108996 | China |
| qAT-39 | 5 | chr5.S_200114950 | 200,114,950 | 2.83E-10 | * | GRMZM2G108996 | China |
| qAT-40 | 5 | chr5.S_200114951 | 200,114,951 | 2.83E-10 | * | GRMZM2G108996 | China |
| qAT-41 | 5 | chr5.S_200114953 | 200,114,953 | 2.83E-10 | * | GRMZM2G108996 | China |
| qAT-42 | 5 | chr5.S_200114954 | 200,114,954 | 2.83E-10 | * | GRMZM2G108996 | China |
| qAT-43 | 5 | chr5.S_200294718 | 200,294,718 | 3.10E-10 | * | GRMZM2G034876 | China |
| qAT-44 | 5 | chr5.S_200294736 | 200,294,736 | 3.89E-09 | * | GRMZM2G034876 | China |
| qAT-45 | 5 | chr5.S_200294763 | 200,294,763 | 3.31E-07 | * | GRMZM2G034876 | China |
| qAT-46 | 5 | PZE-105147666    | 200,300,836 | 6.81E-11 | * | GRMZM2G034876 | China |
| qAT-47 | 5 | chr5.S_200367420 | 200,367,420 | 4.41E-21 | * | GRMZM2G035213 | China |
| qAT-48 | 5 | PZB02283.1       | 200,367,532 | 2.55E-18 | * | GRMZM2G035213 | China |
| qAT-49 | 5 | chr5.S_200369079 | 200,369,079 | 8.93E-17 | * | GRMZM2G035213 | China |
| qAT-50 | 5 | PZE-105147738    | 200,369,124 | 1.86E-16 | * | GRMZM2G035213 | China |
| qAT-51 | 5 | chr5.S_200369163 | 200,369,163 | 4.08E-22 | * | GRMZM2G035213 | China |
| qAT-52 | 5 | chr5.S_200370009 | 200,370,009 | 5.03E-15 | * | GRMZM2G035213 | China |
| qAT-53 | 5 | chr5.S_200370013 | 200,370,013 | 2.00E-13 | * | GRMZM2G035213 | China |
| qAT-54 | 5 | chr5.S_200370675 | 200,370,675 | 6.78E-08 | * | GRMZM2G035213 | China |
| qAT-55 | 5 | chr5.S_200370683 | 200,370,683 | 6.75E-13 | * | GRMZM2G035213 | China |
| qAT-56 | 5 | chr5.S_200370743 | 200,370,743 | 5.92E-07 | * | GRMZM2G035213 | China |
| qAT-57 | 5 | chr5.S_200370781 | 200,370,781 | 3.76E-15 | * | GRMZM2G035213 | China |
| qAT-58 | 5 | chr5.S_200370782 | 200,370,782 | 8.65E-16 | * | GRMZM2G035213 | China |
| qAT-59 | 5 | chr5.S_200380468 | 200,380,468 | 4.22E-07 | * | GRMZM2G035213 | China |
| qAT-60 | 5 | chr5.S_200380534 | 200,380,534 | 8.09E-07 | * | GRMZM2G035213 | China |
| qAT-61 | 5 | chr5.S_200380572 | 200,380,572 | 1.02E-15 | * | GRMZM2G167431 | China |
| qAT-62 | 5 | chr5.S_200380573 | 200,380,573 | 2.94E-08 | * | GRMZM2G167431 | China |
| qAT-63 | 5 | chr5.S_200380575 | 200,380,575 | 1.02E-15 | * | GRMZM2G167431 | China |
| qAT-64 | 5 | chr5.S_200380576 | 200,380,576 | 2.96E-19 | * | GRMZM2G167431 | China |
| qAT-65 | 5 | chr5.S_200380614 | 200,380,614 | 2.28E-09 | * | GRMZM2G167431 | China |
| qAT-66 | 5 | chr5.S_200380699 | 200,380,699 | 1.44E-15 | * | GRMZM2G167431 | China |
| qAT-67 | 5 | chr5.S_200380732 | 200,380,732 | 1.44E-15 | * | GRMZM2G167431 | China |
| qAT-68 | 5 | chr5.S_200380825 | 200,380,825 | 1.21E-12 | * | GRMZM2G167431 | China |
| qAT-69 | 5 | chr5.S_200381453 | 200,381,453 | 1.21E-12 | * | GRMZM2G167431 | China |
| qAT-70 | 5 | chr5.S_200381475 | 200,381,475 | 1.21E-12 | * | GRMZM2G167431 | China |
| qAT-71 | 5 | chr5.S_200382168 | 200,382,168 | 5.25E-13 | * | GRMZM2G167431 | China |
| qAT-72 | 5 | chr5.S_200382301 | 200,382,301 | 2.55E-13 | * | GRMZM2G167431 | China |
| qAT-73 | 5 | chr5.S_200382311 | 200,382,311 | 1.71E-06 | * | GRMZM2G167431 | China |
| qAT-74 | 5 | chr5.S_200435108 | 200,435,108 | 1.39E-17 | * | GRMZM2G325019 | China |
| qAT-75 | 5 | chr5.S_200435117 | 200,435,117 | 1.98E-08 | * | GRMZM2G325019 | China |
| qAT-76 | 5 | PZE-105147471    | 200,435,300 | 2.11E-14 | * | GRMZM2G325019 | China |
| qAT-77 | 5 | chr5.S_200436292 | 200,436,292 | 5.10E-21 | * | GRMZM2G325019 | China |
| qAT-78 | 5 | chr5.S_200437084 | 200,437,084 | 9.09E-13 | * | GRMZM2G325019 | China |
| qAT-79 | 5 | chr5.S_200437319 | 200,437,319 | 2.17E-09 | * | GRMZM2G325019 | China |
| qAT-80 | 5 | chr5.S_200437366 | 200,437,366 | 9.99E-09 | * | GRMZM2G325019 | China |
| qAT-81 | 5 | chr5.S_200437468 | 200,437,468 | 1.53E-10 | * | GRMZM2G325019 | China |
| qAT-82 | 5 | chr5.S_200437599 | 200,437,599 | 4.64E-10 | * | GRMZM2G325019 | China |
| qAT-83 | 5 | chr5.S_200437607 | 200,437,607 | 1.26E-09 | * | GRMZM2G325019 | China |
| qAT-84 | 5 | chr5.S_200437642 | 200,437,642 | 5.67E-13 | * | GRMZM2G325019 | China |
| qAT-85 | 5 | chr5.S_200437660 | 200,437,660 | 7.81E-08 | * | GRMZM2G325019 | China |
| qAT-86 | 5 | chr5.S_200437708 | 200,437,708 | 1.46E-10 | * | GRMZM2G325019 | China |
| qAT-87 | 5 | chr5.S_200437813 | 200,437,813 | 6.49E-07 | * | GRMZM2G325019 | China |

|                |   |                        |             |          |   |                      |       |
|----------------|---|------------------------|-------------|----------|---|----------------------|-------|
| <i>qAT-88</i>  | 5 | chr5.S_200437879       | 200,437,879 | 5.60E-17 | * | <i>GRMZM2G325019</i> | China |
| <i>qAT-89</i>  | 5 | chr5.S_200437882       | 200,437,882 | 6.44E-09 | * | <i>GRMZM2G325019</i> | China |
| <i>qAT-90</i>  | 5 | chr5.S_200437909       | 200,437,909 | 6.44E-09 | * | <i>GRMZM2G325019</i> | China |
| <i>qAT-91</i>  | 5 | chr5.S_200438027       | 200,438,027 | 2.51E-15 | * | <i>GRMZM2G325019</i> | China |
| <i>qAT-92</i>  | 5 | chr5.S_200438197       | 200,438,197 | 3.35E-13 | * | <i>GRMZM2G325019</i> | China |
| <i>qAT-93</i>  | 5 | chr5.S_200438220       | 200,438,220 | 1.51E-09 | * | <i>GRMZM2G325019</i> | China |
| <i>qAT-94</i>  | 5 | chr5.S_200438234       | 200,438,234 | 5.21E-09 | * | <i>GRMZM2G325019</i> | China |
| <i>qAT-95</i>  | 5 | chr5.S_200438247       | 200,438,247 | 4.18E-07 | * | <i>GRMZM2G325019</i> | China |
| <i>qAT-96</i>  | 5 | chr5.S_200438314       | 200,438,314 | 3.50E-12 | * | <i>GRMZM2G325019</i> | China |
| <i>qAT-97</i>  | 5 | chr5.S_200438352       | 200,438,352 | 8.14E-12 | * | <i>GRMZM2G325038</i> | China |
| <i>qAT-98</i>  | 5 | chr5.S_200438462       | 200,438,462 | 5.80E-12 | * | <i>GRMZM2G325038</i> | China |
| <i>qAT-99</i>  | 5 | chr5.S_200438465       | 200,438,465 | 3.65E-12 | * | <i>GRMZM2G325038</i> | China |
| <i>qAT-100</i> | 5 | chr5.S_200438466       | 200,438,466 | 3.65E-12 | * | <i>GRMZM2G325038</i> | China |
| <i>qAT-101</i> | 5 | chr5.S_200438485       | 200,438,485 | 3.19E-09 | * | <i>GRMZM2G325038</i> | China |
| <i>qAT-102</i> | 5 | chr5.S_200438560       | 200,438,560 | 1.80E-10 | * | <i>GRMZM2G325038</i> | China |
| <i>qAT-103</i> | 5 | chr5.S_200438590       | 200,438,590 | 2.27E-11 | * | <i>GRMZM2G325038</i> | China |
| <i>qAT-104</i> | 5 | chr5.S_200438694       | 200,438,694 | 1.24E-13 | * | <i>GRMZM2G325038</i> | China |
| <i>qAT-105</i> | 5 | chr5.S_200438801       | 200,438,801 | 1.91E-07 | * | <i>GRMZM2G325038</i> | China |
| <i>qAT-106</i> | 5 | chr5.S_200438905       | 200,438,905 | 6.38E-07 | * | <i>GRMZM2G325038</i> | China |
| <i>qAT-107</i> | 5 | chr5.S_200528650       | 200,528,650 | 2.02E-07 | * | <i>GRMZM2G108087</i> | China |
| <i>qAT-108</i> | 5 | chr5.S_200528660       | 200,528,660 | 2.02E-07 | * | <i>GRMZM2G108087</i> | China |
| <i>qAT-109</i> | 5 | chr5.S_200528663       | 200,528,663 | 6.56E-07 | * | <i>GRMZM2G108087</i> | China |
| <i>qAT-110</i> | 5 | chr5.S_200552005       | 200,552,005 | 7.18E-11 | * | <i>GRMZM2G092749</i> | China |
| <i>qAT-111</i> | 5 | chr5.S_200552079       | 200,552,079 | 9.38E-09 | * | <i>GRMZM2G092749</i> | China |
| <i>qAT-112</i> | 5 | chr5.S_200684527       | 200,684,527 | 4.82E-10 | * | <i>GRMZM2G150374</i> | China |
| <i>qAT-113</i> | 5 | chr5.S_200684528       | 200,684,528 | 4.82E-10 | * | <i>GRMZM2G150374</i> | China |
| <i>qAT-114</i> | 5 | chr5.S_200684529       | 200,684,529 | 4.82E-10 | * | <i>GRMZM2G150374</i> | China |
| <i>qAT-115</i> | 5 | chr5.S_200684530       | 200,684,530 | 4.82E-10 | * | <i>GRMZM2G150374</i> | China |
| <i>qAT-116</i> | 5 | chr5.S_200686561       | 200,686,561 | 4.40E-10 | * | <i>GRMZM2G150374</i> | China |
| <i>qAT-117</i> | 5 | chr5.S_200822060       | 200,822,060 | 2.44E-08 | * | <i>GRMZM2G046748</i> | China |
| <i>qAT-118</i> | 5 | chr5.S_200824912       | 200,824,912 | 8.22E-09 | * | <i>GRMZM2G046748</i> | China |
| <i>qAT-119</i> | 5 | PUT-163a-148963345-597 | 200,824,929 | 1.18E-06 | * | <i>GRMZM2G046748</i> | China |
| <i>qAT-120</i> | 5 | SYN5678                | 200,871,732 | 1.17E-08 | * | <i>GRMZM2G347767</i> | China |
| <i>qAT-121</i> | 5 | PZE-105148878          | 200,877,505 | 1.59E-07 | * | <i>GRMZM2G046244</i> | China |
| <i>qAT-122</i> | 5 | chr5.S_200878876       | 200,878,876 | 3.30E-10 | * | <i>GRMZM2G046244</i> | China |
| <i>qAT-123</i> | 5 | chr5.S_200878917       | 200,878,917 | 4.57E-10 | * | <i>GRMZM2G046244</i> | China |
| <i>qAT-124</i> | 5 | chr5.S_200878929       | 200,878,929 | 1.05E-09 | * | <i>GRMZM2G046244</i> | China |
| <i>qAT-125</i> | 5 | chr5.S_201072279       | 201,072,279 | 1.00E-06 | * | <i>GRMZM2G050734</i> | China |
| <i>qAT-126</i> | 5 | chr5.S_201073030       | 201,073,030 | 1.58E-06 | * | <i>GRMZM2G050734</i> | China |
| <i>qAT-127</i> | 5 | chr5.S_201226344       | 201,226,344 | 1.95E-07 | * | <i>GRMZM2G417229</i> | China |
| <i>qAT-128</i> | 5 | chr5.S_201267187       | 201,267,187 | 6.67E-09 | * | <i>GRMZM2G320307</i> | China |
| <i>qAT-129</i> | 5 | chr5.S_201403633       | 201,403,633 | 6.96E-07 | * | <i>GRMZM2G140739</i> | China |
| <i>qAT-130</i> | 5 | chr5.S_201471104       | 201,471,104 | 1.04E-06 | * | <i>GRMZM2G147377</i> | China |
| <i>qAT-131</i> | 5 | chr5.S_201938646       | 201,938,646 | 9.39E-10 | * | <i>GRMZM2G009506</i> | China |
| <i>qAT-132</i> | 5 | chr5.S_202054574       | 202,054,574 | 5.94E-08 | * | <i>GRMZM2G020040</i> | China |
| <i>qAT-133</i> | 5 | chr5.S_202058856       | 202,058,856 | 4.37E-08 | * | <i>GRMZM2G020040</i> | China |
| <i>qAT-134</i> | 5 | chr5.S_202059377       | 202,059,377 | 5.94E-08 | * | <i>GRMZM2G020040</i> | China |
| <i>qAT-135</i> | 5 | SYN35167               | 202,061,590 | 7.65E-08 | * | <i>GRMZM2G315127</i> | China |
| <i>qAT-136</i> | 5 | chr5.S_202063233       | 202,063,233 | 5.79E-08 | * | <i>GRMZM2G315127</i> | China |
| <i>qAT-137</i> | 5 | SYN35165               | 202,065,247 | 4.30E-07 | * | <i>GRMZM2G315127</i> | China |
| <i>qAT-138</i> | 5 | chr5.S_202084979       | 202,084,979 | 3.49E-08 | * | <i>GRMZM2G180983</i> | China |
| <i>qAT-139</i> | 5 | chr5.S_202085266       | 202,085,266 | 5.78E-08 | * | <i>GRMZM2G180983</i> | China |

|    |                |   |                  |             |          |   |                      |       |
|----|----------------|---|------------------|-------------|----------|---|----------------------|-------|
| GT | <i>qAT-140</i> | 5 | SYN35180         | 202,085,442 | 1.27E-07 | * | <i>GRMZM2G180983</i> | China |
|    | <i>qAT-141</i> | 5 | SYN35179         | 202,085,459 | 8.76E-08 | * | <i>GRMZM2G180983</i> | China |
|    | <i>qAT-142</i> | 5 | chr5.S_202095425 | 202,095,425 | 6.34E-08 | * | <i>GRMZM2G481605</i> | China |
|    | <i>qAT-143</i> | 5 | chr5.S_202221152 | 202,221,152 | 3.91E-07 | * | <i>GRMZM2G475349</i> | China |
|    | <i>qAT-144</i> | 5 | chr5.S_202286259 | 202,286,259 | 1.94E-07 | * | <i>GRMZM2G164912</i> | China |
|    | <i>qAT-145</i> | 5 | chr5.S_202286260 | 202,286,260 | 1.94E-07 | * | <i>GRMZM2G164912</i> | China |
|    | <i>qAT-146</i> | 5 | chr5.S_202286261 | 202,286,261 | 7.21E-07 | * | <i>GRMZM2G164912</i> | China |
|    | <i>qAT-147</i> | 5 | chr5.S_202287726 | 202,287,726 | 2.18E-07 | * | <i>GRMZM2G164912</i> | China |
|    | <i>qAT-148</i> | 5 | chr5.S_213281088 | 213,281,088 | 1.17E-06 | * | <i>GRMZM2G018484</i> | China |
|    | <i>qAT-149</i> | 5 | chr5.S_213281249 | 213,281,249 | 2.22E-07 | * | <i>GRMZM2G018484</i> | China |
|    | <i>qAT-150</i> | 5 | chr5.S_213282225 | 213,282,225 | 4.01E-08 | * | <i>GRMZM2G018103</i> | China |
|    | <i>qAT-151</i> | 5 | chr5.S_213282760 | 213,282,760 | 4.27E-08 | * | <i>GRMZM2G018103</i> | China |
|    | <i>qGT-1</i>   | 1 | chr1.S_228564342 | 228,564,342 | 1.04E-07 | * | <i>GRMZM5G888696</i> | China |
|    | <i>qGT-2</i>   | 1 | chr1.S_228564433 | 228,564,433 | 1.04E-07 | * | <i>GRMZM5G888696</i> | China |
|    | <i>qGT-3</i>   | 1 | chr1.S_228564475 | 228,564,475 | 1.04E-07 | * | <i>GRMZM5G888696</i> | China |
|    | <i>qGT-4</i>   | 1 | chr1.S_228564518 | 228,564,518 | 1.04E-07 | * | <i>GRMZM5G888696</i> | China |
|    | <i>qGT-5</i>   | 1 | chr1.S_228564574 | 228,564,574 | 7.31E-08 | * | <i>GRMZM5G888696</i> | China |
|    | <i>qGT-6</i>   | 1 | PZE-101183878    | 228,564,617 | 2.20E-07 | * | <i>GRMZM5G888696</i> | China |
|    | <i>qGT-7</i>   | 5 | chr5.S_175728543 | 175,728,543 | 3.33E-07 | * | <i>GRMZM2G024739</i> | China |
|    | <i>qGT-8</i>   | 6 | chr6.S_92311076  | 92,311,076  | 1.19E-06 | * | <i>GRMZM2G146190</i> | China |
|    | <i>qGT-9</i>   | 6 | chr6.S_92311381  | 92,311,381  | 1.19E-06 | * | <i>GRMZM2G146190</i> | China |
|    | <i>qGT-10</i>  | 6 | chr6.S_92311403  | 92,311,403  | 1.19E-06 | * | <i>GRMZM2G146190</i> | China |
|    | <i>qGT-11</i>  | 6 | chr6.S_92311428  | 92,311,428  | 1.19E-06 | * | <i>GRMZM2G146190</i> | China |
|    | <i>qGT-12</i>  | 6 | chr6.S_92311455  | 92,311,455  | 1.19E-06 | * | <i>GRMZM2G146190</i> | China |
|    | <i>qGT-13</i>  | 6 | chr6.S_92311522  | 92,311,522  | 1.19E-06 | * | <i>GRMZM2G146190</i> | China |
|    | <i>qGT-14</i>  | 6 | chr6.S_92311686  | 92,311,686  | 1.19E-06 | * | <i>GRMZM2G146190</i> | China |
| TT | <i>qGT-15</i>  | 6 | chr6.S_104858461 | 104,858,461 | 6.75E-08 | * | <i>GRMZM2G169089</i> | China |
|    | <i>qGT-16</i>  | 6 | chr6.S_104858493 | 104,858,493 | 2.21E-08 | * | <i>GRMZM2G169089</i> | China |
|    | <i>qGT-17</i>  | 8 | chr8.S_38490100  | 38,490,100  | 3.66E-07 | * | <i>GRMZM2G097103</i> | China |
|    | <i>qTT-1</i>   | 1 | PZE-101132612    | 170,961,674 | 1.16E-06 | * | <i>GRMZM2G115615</i> | China |
|    | <i>qTT-2</i>   | 2 | chr2.S_149186669 | 149,186,669 | 6.06E-08 | * | <i>GRMZM2G175008</i> | China |
|    | <i>qTT-3</i>   | 2 | chr2.S_149187319 | 149,187,319 | 3.29E-07 | * | <i>GRMZM2G175008</i> | China |
|    | <i>qTT-4</i>   | 2 | chr2.S_149204826 | 149,204,826 | 5.88E-07 | * | <i>GRMZM5G816552</i> | China |
|    | <i>qTT-5</i>   | 2 | chr2.S_149204828 | 149,204,828 | 5.88E-07 | * | <i>GRMZM5G816552</i> | China |
|    | <i>qTT-6</i>   | 2 | chr2.S_149514761 | 149,514,761 | 1.32E-07 | * | <i>GRMZM2G079127</i> | China |
|    | <i>qTT-7</i>   | 2 | chr2.S_149515487 | 149,515,487 | 3.42E-08 | * | <i>GRMZM2G079127</i> | China |
|    | <i>qTT-8</i>   | 2 | chr2.S_149520851 | 149,520,851 | 3.09E-09 | * | <i>GRMZM2G079236</i> | China |
|    | <i>qTT-9</i>   | 2 | chr2.S_149522783 | 149,522,783 | 3.09E-09 | * | <i>GRMZM2G079236</i> | China |
|    | <i>qTT-10</i>  | 2 | chr2.S_149522937 | 149,522,937 | 3.09E-09 | * | <i>GRMZM2G079236</i> | China |
|    | <i>qTT-11</i>  | 2 | chr2.S_149522941 | 149,522,941 | 3.09E-09 | * | <i>GRMZM2G079236</i> | China |
|    | <i>qTT-12</i>  | 2 | chr2.S_149522977 | 149,522,977 | 3.09E-09 | * | <i>GRMZM2G079236</i> | China |
|    | <i>qTT-13</i>  | 2 | chr2.S_149785952 | 149,785,952 | 3.65E-09 | * | <i>GRMZM2G377797</i> | China |
|    | <i>qTT-14</i>  | 2 | chr2.S_150700155 | 150,700,155 | 1.11E-07 | * | <i>GRMZM2G007283</i> | China |
|    | <i>qTT-15</i>  | 2 | chr2.S_150700305 | 150,700,305 | 4.77E-09 | * | <i>GRMZM2G007283</i> | China |
|    | <i>qTT-16</i>  | 2 | chr2.S_150702210 | 150,702,210 | 7.20E-09 | * | <i>GRMZM2G007283</i> | China |
|    | <i>qTT-17</i>  | 2 | chr2.S_150703980 | 150,703,980 | 7.38E-09 | * | <i>GRMZM2G007283</i> | China |
|    | <i>qTT-18</i>  | 2 | chr2.S_150704064 | 150,704,064 | 7.38E-09 | * | <i>GRMZM2G007283</i> | China |
|    | <i>qTT-19</i>  | 2 | chr2.S_150704088 | 150,704,088 | 7.38E-09 | * | <i>GRMZM2G007283</i> | China |
|    | <i>qTT-20</i>  | 2 | chr2.S_207378625 | 207,378,625 | 1.90E-09 | * | <i>GRMZM2G022213</i> | China |
|    | <i>qTT-21</i>  | 2 | chr2.S_207378663 | 207,378,663 | 1.90E-09 | * | <i>GRMZM2G022213</i> | China |
|    | <i>qTT-22</i>  | 2 | chr2.S_207380989 | 207,380,989 | 7.97E-08 | * | <i>GRMZM2G022213</i> | China |
|    | <i>qTT-23</i>  | 3 | chr3.S_2218034   | 2,218,034   | 1.87E-07 | * | <i>GRMZM2G159307</i> | China |

RT

|        |    |                  |             |          |   |                  |       |
|--------|----|------------------|-------------|----------|---|------------------|-------|
| qTT-24 | 3  | chr3.S_2218607   | 2,218,607   | 6.77E-07 | * | GRMZM2G159307    | China |
| qTT-25 | 3  | chr3.S_2220756   | 2,220,756   | 1.87E-07 | * | GRMZM2G159388    | China |
| qTT-26 | 4  | chr4.S_18686833  | 18,686,833  | 1.65E-07 | * | GRMZM5G892742    | China |
| qTT-27 | 4  | chr4.S_18686834  | 18,686,834  | 1.65E-07 | * | GRMZM5G892742    | China |
| qTT-28 | 4  | PZE-104028481    | 34,338,513  | 8.34E-07 | * | GRMZM2G000481    | China |
| qTT-29 | 4  | chr4.S_34338552  | 34,338,552  | 1.60E-06 | * | GRMZM2G000481    | China |
| qTT-30 | 4  | chr4.S_34467924  | 34,467,924  | 1.60E-06 | * | GRMZM2G157306    | China |
| qTT-31 | 4  | chr4.S_34473783  | 34,473,783  | 1.60E-06 | * | GRMZM2G157306    | China |
| qTT-32 | 4  | chr4.S_151748204 | 151,748,204 | 8.20E-07 | * | GRMZM2G150714    | China |
| qTT-33 | 5  | chr5.S_6803634   | 6,803,634   | 1.09E-06 | * | GRMZM2G086287    | China |
| qTT-34 | 5  | chr5.S_6803876   | 6,803,876   | 1.06E-06 | * | GRMZM2G086287    | China |
| qTT-35 | 5  | chr5.S_6803903   | 6,803,903   | 1.06E-06 | * | GRMZM2G086287    | China |
| qTT-36 | 5  | chr5.S_6803934   | 6,803,934   | 1.09E-06 | * | GRMZM2G086287    | China |
| qTT-37 | 5  | chr5.S_6804176   | 6,804,176   | 1.09E-06 | * | GRMZM2G086287    | China |
| qTT-38 | 5  | chr5.S_6804312   | 6,804,312   | 1.09E-06 | * | GRMZM2G086287    | China |
| qTT-39 | 5  | chr5.S_6804406   | 6,804,406   | 1.09E-06 | * | GRMZM2G086287    | China |
| qTT-40 | 5  | chr5.S_6805126   | 6,805,126   | 1.09E-06 | * | GRMZM2G086287    | China |
| qTT-41 | 5  | chr5.S_6805234   | 6,805,234   | 1.09E-06 | * | GRMZM2G086287    | China |
| qTT-42 | 5  | chr5.S_6805341   | 6,805,341   | 1.09E-06 | * | GRMZM2G086287    | China |
| qTT-43 | 5  | chr5.S_6805362   | 6,805,362   | 1.09E-06 | * | GRMZM2G086287    | China |
| qTT-44 | 5  | chr5.S_6805384   | 6,805,384   | 1.09E-06 | * | GRMZM2G086287    | China |
| qTT-45 | 5  | chr5.S_6805416   | 6,805,416   | 1.09E-06 | * | GRMZM2G086287    | China |
| qTT-46 | 5  | chr5.S_6805480   | 6,805,480   | 1.09E-06 | * | GRMZM2G086287    | China |
| qTT-47 | 5  | chr5.S_6805760   | 6,805,760   | 9.49E-07 | * | GRMZM2G086287    | China |
| qTT-48 | 5  | chr5.S_6806066   | 6,806,066   | 9.49E-07 | * | GRMZM2G086287    | China |
| qTT-49 | 5  | chr5.S_6806090   | 6,806,090   | 9.49E-07 | * | GRMZM2G086287    | China |
| qTT-50 | 5  | chr5.S_6806177   | 6,806,177   | 1.23E-06 | * | GRMZM2G086287    | China |
| qTT-51 | 5  | chr5.S_6806219   | 6,806,219   | 9.49E-07 | * | GRMZM2G086287    | China |
| qTT-52 | 5  | chr5.S_20773412  | 20,773,412  | 7.12E-07 | * | GRMZM2G002874    | China |
| qTT-53 | 5  | chr5.S_26095529  | 26,095,529  | 2.40E-07 | * | GRMZM2G022175    | China |
| qTT-54 | 5  | chr5.S_26095624  | 26,095,624  | 2.40E-07 | * | GRMZM2G022175    | China |
| qTT-55 | 5  | chr5.S_188606921 | 188,606,921 | 1.28E-06 | * | GRMZM2G139858    | China |
| qTT-56 | 6  | chr6.S_104858404 | 104,858,404 | 4.02E-08 | * | GRMZM2G169089    | China |
| qTT-57 | 8  | chr8.S_8399315   | 8,399,315   | 1.46E-08 | * | GRMZM2G066057    | China |
| qTT-58 | 8  | chr8.S_23889464  | 23,889,464  | 1.08E-06 | * | GRMZM2G099483    | China |
| qTT-59 | 8  | chr8.S_38520871  | 38,520,871  | 1.36E-08 | * | GRMZM2G003022    | China |
| qTT-60 | 10 | PZE-110061746    | 116,894,888 | 5.61E-07 | * | GRMZM2G054632    | China |
| qTT-61 | 10 | PZE-110062783    | 117,774,209 | 1.05E-06 | * | GRMZM2G009888    | China |
| qRT-1  | 2  | chr2.S_5424718   | 5,424,718   | 5.95E-07 | * | GRMZM2G055752    | China |
| qRT-2  | 4  | chr4.S_54553527  | 54,553,527  | 1.71E-06 | * | GRMZM2G121776    | China |
| qRT-3  | 4  | chr4.S_136059154 | 136,059,154 | 1.42E-06 | * | GRMZM2G067417    | China |
| qRT-4  | 5  | chr5.S_1936      | 1,936       | 4.87E-08 | * | GRMZM2G356204    | China |
| qRT-5  | 5  | chr5.S_108368    | 108,368     | 2.97E-08 | * | GRMZM2G089498    | China |
| qRT-6  | 5  | chr5.S_108369    | 108,369     | 2.97E-08 | * | GRMZM2G089498    | China |
| qRT-7  | 5  | chr5.S_109095    | 109,095     | 7.78E-08 | * | GRMZM2G089498    | China |
| qRT-8  | 5  | chr5.S_2582651   | 2,582,651   | 1.67E-06 | * | GRMZM2G110952    | China |
| qRT-9  | 5  | chr5.S_2582687   | 2,582,687   | 1.67E-06 | * | GRMZM2G110952    | China |
| qRT-10 | 5  | chr5.S_196508766 | 196,508,766 | 6.50E-08 | * | GRMZM2G022645    | China |
| qRT-11 | 5  | chr5.S_196511108 | 196,511,108 | 7.03E-07 | * | GRMZM2G022645    | China |
| qRT-12 | 5  | chr5.S_199862910 | 199,862,910 | 1.70E-08 | * | GRMZM2G021270    | China |
| qRT-13 | 5  | chr5.S_199871369 | 199,871,369 | 2.80E-12 | * | GRMZM2G317738    | China |
| qRT-14 | 5  | chr5.S_199984630 | 199,984,630 | 2.09E-11 | * | AC233960.1_FG002 | China |

|           |               |    |                   |             |          |        |                         |       |                     |
|-----------|---------------|----|-------------------|-------------|----------|--------|-------------------------|-------|---------------------|
|           | <i>qRT-15</i> | 5  | PZE-105147361     | 200,115,761 | 7.65E-07 | *      | <i>GRMZM2G108996</i>    | China |                     |
|           | <i>qRT-16</i> | 5  | chr5.S_200292540  | 200,292,540 | 1.87E-07 | *      | <i>GRMZM2G034876</i>    | China |                     |
|           | <i>qRT-17</i> | 5  | chr5.S_200292661  | 200,292,661 | 2.49E-07 | *      | <i>GRMZM2G034876</i>    | China |                     |
|           | <i>qRT-18</i> | 5  | chr5.S_200293660  | 200,293,660 | 2.58E-08 | *      | <i>GRMZM2G034876</i>    | China |                     |
|           | <i>qRT-19</i> | 5  | chr5.S_200293667  | 200,293,667 | 3.64E-08 | *      | <i>GRMZM2G034876</i>    | China |                     |
|           | <i>qRT-20</i> | 5  | chr5.S_200293668  | 200,293,668 | 2.67E-08 | *      | <i>GRMZM2G034876</i>    | China |                     |
|           | <i>qRT-21</i> | 5  | chr5.S_200293669  | 200,293,669 | 2.67E-08 | *      | <i>GRMZM2G034876</i>    | China |                     |
|           | <i>qRT-22</i> | 5  | chr5.S_200293670  | 200,293,670 | 2.67E-08 | *      | <i>GRMZM2G034876</i>    | China |                     |
|           | <i>qRT-23</i> | 5  | chr5.S_200293693  | 200,293,693 | 7.60E-09 | *      | <i>GRMZM2G034876</i>    | China |                     |
|           | <i>qRT-24</i> | 5  | PZE-105147766     | 200,370,065 | 4.98E-10 | *      | <i>GRMZM2G035213</i>    | China |                     |
|           | <i>qRT-25</i> | 5  | chr5.S_200437162  | 200,437,162 | 6.90E-10 | *      | <i>GRMZM2G325019</i>    | China |                     |
|           | <i>qRT-26</i> | 5  | chr5.S_200438572  | 200,438,572 | 9.69E-10 | *      | <i>GRMZM2G325038</i>    | China |                     |
|           | <i>qRT-27</i> | 5  | chr5.S_200438920  | 200,438,920 | 3.89E-07 | *      | <i>GRMZM2G325038</i>    | China |                     |
|           | <i>qRT-28</i> | 5  | chr5.S_200481780  | 200,481,780 | 6.74E-08 | *      | <i>GRMZM2G092959</i>    | China |                     |
|           | <i>qRT-29</i> | 5  | chr5.S_200527129  | 200,527,129 | 7.51E-07 | *      | <i>GRMZM2G108087</i>    | China |                     |
|           | <i>qRT-30</i> | 5  | chr5.S_200527135  | 200,527,135 | 7.51E-07 | *      | <i>GRMZM2G108087</i>    | China |                     |
|           | <i>qRT-31</i> | 5  | chr5.S_200527246  | 200,527,246 | 6.41E-07 | *      | <i>GRMZM2G108087</i>    | China |                     |
|           | <i>qRT-32</i> | 5  | chr5.S_200528699  | 200,528,699 | 1.15E-07 | *      | <i>GRMZM2G108087</i>    | China |                     |
|           | <i>qRT-33</i> | 5  | chr5.S_200552153  | 200,552,153 | 2.64E-08 | *      | <i>GRMZM2G092749</i>    | China |                     |
|           | <i>qRT-34</i> | 5  | chr5.S_200552162  | 200,552,162 | 2.64E-08 | *      | <i>GRMZM2G092749</i>    | China |                     |
|           | <i>qRT-35</i> | 5  | chr5.S_200778988  | 200,778,988 | 1.26E-06 | *      | <i>GRMZM2G046909</i>    | China |                     |
|           | <i>qRT-36</i> | 5  | chr5.S_200779131  | 200,779,131 | 1.51E-06 | *      | <i>GRMZM2G046909</i>    | China |                     |
|           | <i>qRT-37</i> | 5  | SYN32527          | 202,132,225 | 1.40E-06 | *      | <i>GRMZM2G341957</i>    | China |                     |
|           | <i>qRT-38</i> | 5  | chr5.S_212093838  | 212,093,838 | 6.04E-07 | *      | <i>GRMZM2G039683</i>    | China |                     |
|           | <i>qRT-39</i> | 6  | chr6.S_7137764    | 7,137,764   | 8.17E-07 | *      | <i>GRMZM2G127299</i>    | China |                     |
|           | <i>qRT-40</i> | 9  | chr9.S_141452577  | 141,452,577 | 5.43E-07 | *      | <i>GRMZM5G818232</i>    | China |                     |
|           | <i>qRT-41</i> | 10 | chr10.S_4694476   | 4,694,476   | 2.62E-07 | *      | <i>GRMZM2G004534</i>    | China |                     |
|           | <i>qRT-42</i> | 10 | chr10.S_4695464   | 4,695,464   | 1.21E-07 | *      | <i>GRMZM2G004534</i>    | China |                     |
|           | <i>qRT-43</i> | 10 | chr10.S_4695681   | 4,695,681   | 3.70E-07 | *      | <i>GRMZM2G004534</i>    | China |                     |
|           | <i>qRT-44</i> | 10 | chr10.S_4695862   | 4,695,862   | 1.25E-06 | *      | <i>GRMZM2G004534</i>    | China |                     |
|           | <i>qRT-45</i> | 10 | chr10.S_4696252   | 4,696,252   | 1.75E-06 | *      | <i>GRMZM2G004534</i>    | China |                     |
|           | <i>qRT-46</i> | 10 | chr10.S_10600038  | 10,600,038  | 2.17E-07 | *      | <i>GRMZM2G402493</i>    | China |                     |
|           | <i>qRT-47</i> | 10 | chr10.S_10600039  | 10,600,039  | 2.17E-07 | *      | <i>GRMZM2G402493</i>    | China |                     |
|           | <i>qRT-48</i> | 10 | chr10.S_10600040  | 10,600,040  | 2.17E-07 | *      | <i>GRMZM2G402493</i>    | China |                     |
|           | <i>qRT-49</i> | 10 | chr10.S_136945275 | 136,945,275 | 1.76E-06 | *      | <i>AC235534.1_FG001</i> | China |                     |
|           | <i>qRT-50</i> | 10 | chr10.S_140994710 | 140,994,710 | 6.19E-08 | *      | <i>GRMZM2G109753</i>    | China |                     |
|           | <i>qRT-51</i> | 10 | chr10.S_140994750 | 140,994,750 | 6.19E-08 | *      | <i>GRMZM2G109753</i>    | China |                     |
| <b>AT</b> | <i>qAT-1</i>  | 1  | chr1_88972694     | 88972694    | 2.06E-06 | 0.1542 | <i>GRMZM2G089291</i>    | China | (Xiao et al., 2020) |
|           | <i>qAT-2</i>  | 2  | chr2_99655269     | 99655269    | 1.98E-06 | 0.1602 | <i>AC196212.3_FG001</i> | China |                     |
|           | <i>qAT-3</i>  | 5  | chr5_199221258    | 199221258   | 1.74E-07 | 0.2062 | <i>GRMZM2G141975</i>    | China |                     |
|           | <i>qAT-4</i>  | 5  | chr5_199340929    | 199340929   | 3.71E-08 | 0.2623 | <i>GRMZM2G060834</i>    | China |                     |
|           | <i>qAT-5</i>  | 5  | chr5_199422724    | 199422724   | 7.76E-08 | 0.2447 | <i>GRMZM2G376067</i>    | China |                     |
|           | <i>qAT-6</i>  | 5  | chr5_200376352    | 200376352   | 8.33E-10 | 0.3215 | <i>GRMZM2G035213</i>    | China |                     |
|           | <i>qAT-7</i>  | 6  | chr6_24552456     | 24552456    | 3.42E-06 | 0.1521 | <i>GRMZM2G111579</i>    | China |                     |
|           | <i>qAT-8</i>  | 6  | chr6_51279284     | 51279284    | 7.99E-07 | 0.1588 | <i>GRMZM2G000707</i>    | China |                     |
| <b>BT</b> | <i>qAT-9</i>  | 6  | chr6_119248607    | 119248607   | 1.61E-06 | 0.1505 | <i>GRMZM2G104511</i>    | China |                     |
|           | <i>qBT-1</i>  | 1  | chr1_21361394     | 21361394    | 4.64E-08 | 0.2348 | <i>GRMZM5G896834</i>    | China |                     |
|           | <i>qBT-2</i>  | 1  | chr1_27801286     | 27801286    | 3.16E-06 | 0.1704 | <i>GRMZM2G040121</i>    | China |                     |
|           | <i>qBT-3</i>  | 1  | chr1_58731650     | 58731650    | 1.88E-06 | 0.1517 | <i>GRMZM2G097843</i>    | China |                     |
|           | <i>qBT-4</i>  | 1  | chr1_83332454     | 83332454    | 3.85E-07 | 0.1951 | <i>GRMZM2G099467</i>    | China |                     |
|           | <i>qBT-5</i>  | 1  | chr1_88972694     | 88972694    | 1.88E-08 | 0.2117 | <i>GRMZM2G089291</i>    | China |                     |

|          |        |   |                |           |          |        |                  |       |
|----------|--------|---|----------------|-----------|----------|--------|------------------|-------|
| DT<br>RT | qBT-6  | 1 | chr1_96013126  | 96013126  | 2.23E-06 | 0.1754 | GRMZM2G042538    | China |
|          | qBT-7  | 2 | chr2_137684715 | 137684715 | 4.53E-06 | 0.1544 | No               | China |
|          | qBT-8  | 3 | chr3_131370095 | 131370095 | 6.56E-07 | 0.1685 | GRMZM2G447657    | China |
|          | qBT-9  | 3 | chr3_204172506 | 204172506 | 5.66E-06 | 0.2048 | GRMZM2G330298    | China |
|          | qBT-10 | 3 | chr3_228566338 | 228566338 | 4.51E-06 | 0.1418 | AC185276.2_FG006 | China |
|          | qBT-11 | 4 | chr4_7038838   | 7038838   | 9.11E-08 | 0.2292 | GRMZM2G702335    | China |
|          | qBT-12 | 5 | chr5_3322754   | 3322754   | 4.01E-08 | 0.2247 | AC210013.4_FG005 | China |
|          | qBT-13 | 5 | chr5_66308848  | 66308848  | 5.76E-08 | 0.1949 | GRMZM2G006282    | China |
|          | qBT-14 | 5 | chr5_193510153 | 193510153 | 1.12E-06 | 0.2219 | GRMZM2G362848    | China |
|          | qBT-15 | 5 | chr5_199221258 | 199221258 | 5.03E-10 | 0.2834 | GRMZM2G141975    | China |
|          | qBT-16 | 5 | chr5_199340929 | 199340929 | 5.11E-08 | 0.2103 | GRMZM2G060834    | China |
|          | qBT-17 | 6 | chr6_9685268   | 9685268   | 1.49E-06 | 0.1664 | GRMZM2G055238    | China |
|          | qBT-18 | 6 | chr6_20381982  | 20381982  | 4.78E-06 | 0.1521 | No               | China |
|          | qBT-19 | 6 | chr6_24552456  | 24552456  | 1.36E-06 | 0.1594 | GRMZM2G111579    | China |
|          | qBT-20 | 6 | chr6_67456686  | 67456686  | 4.55E-06 | 0.1424 | GRMZM2G137440    | China |
|          | qBT-21 | 6 | chr6_72442017  | 72442017  | 6.07E-06 | 0.1384 | AC194478.3_FG005 | China |
|          | qBT-22 | 6 | chr6_73214934  | 73214934  | 3.82E-06 | 0.1414 | No               | China |
|          | qBT-23 | 6 | chr6_82489783  | 82489783  | 4.85E-06 | 0.1428 | GRMZM2G150348    | China |
|          | qBT-24 | 6 | chr6_113453200 | 113453200 | 1.76E-07 | 0.2042 | GRMZM2G020742    | China |
|          | qBT-25 | 6 | chr6_117903333 | 117903333 | 4.56E-06 | 0.1452 | GRMZM2G435357    | China |
|          | qBT-26 | 6 | chr6_119248607 | 119248607 | 6.38E-06 | 0.1358 | GRMZM2G104511    | China |
|          | qBT-27 | 7 | chr7_105008316 | 105008316 | 5.42E-06 | 0.1371 | GRMZM2G150832    | China |
|          | qBT-28 | 7 | chr7_161885914 | 161885914 | 1.45E-06 | 0.1628 | GRMZM2G411916    | China |
|          | qBT-29 | 9 | chr9_4311642   | 4311642   | 5.03E-06 | 0.139  | GRMZM2G465046    | China |
|          | qBT-30 | 9 | chr9_94675466  | 94675466  | 1.16E-07 | 0.2044 | No               | China |
|          | qBT-31 | 9 | chr9_123234213 | 123234213 | 5.63E-06 | 0.1424 | GRMZM2G057865    | China |
|          | qBT-32 | 9 | chr9_126210698 | 126210698 | 4.53E-07 | 0.177  | AC207309.3_FG010 | China |
|          | qDT-1  | 4 | chr4_169577228 | 169577228 | 1.41E-06 | 0.1626 | GRMZM2G123818    | China |
|          | qRT-1  | 1 | chr1_80813652  | 80813652  | 6.42E-06 | 0.1321 | GRMZM2G049852    | China |
|          | qRT-2  | 1 | chr1_88972694  | 88972694  | 1.89E-07 | 0.1809 | GRMZM2G089291    | China |
|          | qRT-3  | 2 | chr2_101807859 | 101807859 | 5.75E-06 | 0.1385 | GRMZM5G878497    | China |
|          | qRT-4  | 5 | chr5_199221258 | 199221258 | 2.64E-07 | 0.1913 | GRMZM2G141975    | China |
|          | qRT-5  | 5 | chr5_199422724 | 199422724 | 8.82E-08 | 0.2346 | GRMZM2G376067    | China |
|          | qRT-6  | 5 | chr5_200376352 | 200376352 | 3.00E-10 | 0.3098 | GRMZM2G035213    | China |
|          | qRT-7  | 9 | chr9_14027435  | 14027435  | 1.87E-07 | 0.1999 | GRMZM2G149126    | China |
|          | qRT-8  | 9 | chr9_50743440  | 50743440  | 6.35E-06 | 0.1573 | GRMZM2G408256    | China |
|          | qRT-9  | 9 | chr9_58232718  | 58232718  | 1.45E-06 | 0.1759 | GRMZM2G076272    | China |
|          | qRT-10 | 9 | chr9_59379168  | 59379168  | 4.86E-06 | 0.1367 | GRMZM2G005664    | China |
|          | qRT-11 | 9 | chr9_60230402  | 60230402  | 3.74E-06 | 0.1553 | GRMZM2G104481    | China |
|          | qRT-12 | 9 | chr9_92205956  | 92205956  | 6.65E-06 | 0.1439 | GRMZM2G076526    | China |
|          | qRT-13 | 9 | chr9_98638085  | 98638085  | 4.54E-07 | 0.1625 | GRMZM2G177659    | China |
| TT       | qTT-1  | 2 | chr2_99655269  | 99655269  | 3.24E-06 | 0.1587 | AC196212.3_FG001 | China |
|          | qTT-2  | 5 | chr5_199340929 | 199340929 | 2.95E-07 | 0.2133 | GRMZM2G060834    | China |
|          | qTT-3  | 6 | chr6_24552456  | 24552456  | 7.25E-07 | 0.1768 | GRMZM2G111579    | China |
|          | qTT-4  | 6 | chr6_51279284  | 51279284  | 4.41E-06 | 0.1421 | GRMZM2G000707    | China |
| AT3      | qAT3-1 | 4 | chr4_179282037 | 179282037 | 2.70E-06 | 0.1472 | GRMZM5G848268    | China |
|          | qAT3-2 | 5 | chr5_199422724 | 199422724 | 4.11E-07 | 0.228  | GRMZM2G376067    | China |
|          | qAT3-3 | 5 | chr5_200376352 | 200376352 | 5.03E-10 | 0.3032 | GRMZM2G035213    | China |
| RT3      | qRT3-1 | 1 | chr1_15966886  | 15966886  | 5.33E-06 | 0.1877 | GRMZM2G156486    | China |
|          | qRT3-2 | 1 | chr1_29073536  | 29073536  | 2.77E-06 | 0.1548 | GRMZM2G447504    | China |
|          | qRT3-3 | 1 | chr1_86530409  | 86530409  | 3.78E-06 | 0.1675 | GRMZM2G017011    | China |
|          | qRT3-4 | 1 | chr1_89170681  | 89170681  | 9.22E-08 | 0.2201 | AC204552.3_FG001 | China |

|         |    |                |           |          |        |                  |       |
|---------|----|----------------|-----------|----------|--------|------------------|-------|
| qRT3-5  | 1  | chr1_118638363 | 118638363 | 4.26E-06 | 0.1405 | No               | China |
| qRT3-6  | 1  | chr1_124668839 | 124668839 | 5.36E-06 | 0.145  | GRMZM2G359822    | China |
| qRT3-7  | 1  | chr1_132598690 | 132598690 | 6.62E-07 | 0.1642 | GRMZM2G170839    | China |
| qRT3-8  | 1  | chr1_151897716 | 151897716 | 3.39E-06 | 0.1523 | No               | China |
| qRT3-9  | 1  | chr1_209701182 | 209701182 | 2.10E-06 | 0.149  | GRMZM5G825854    | China |
| qRT3-10 | 1  | chr1_211870007 | 211870007 | 1.20E-06 | 0.1591 | GRMZM2G043819    | China |
| qRT3-11 | 1  | chr1_214620377 | 214620377 | 1.51E-07 | 0.1923 | GRMZM2G536825    | China |
| qRT3-12 | 1  | chr1_269769913 | 269769913 | 5.46E-06 | 0.1551 | GRMZM2G077147    | China |
| qRT3-13 | 1  | chr1_294952643 | 294952643 | 3.49E-06 | 0.1432 | GRMZM2G123876    | China |
| qRT3-14 | 2  | chr2_1320971   | 1320971   | 2.36E-06 | 0.1581 | GRMZM2G147854    | China |
| qRT3-15 | 2  | chr2_58478180  | 58478180  | 1.35E-06 | 0.1564 | GRMZM2G062504    | China |
| qRT3-16 | 2  | chr2_143586615 | 143586615 | 5.67E-06 | 0.1496 | GRMZM2G168829    | China |
| qRT3-17 | 2  | chr2_147917250 | 147917250 | 4.05E-07 | 0.1711 | GRMZM2G424491    | China |
| qRT3-18 | 2  | chr2_179437626 | 179437626 | 4.23E-06 | 0.1407 | GRMZM2G703265    | China |
| qRT3-19 | 2  | chr2_213974400 | 213974400 | 3.87E-06 | 0.146  | GRMZM2G354013    | China |
| qRT3-20 | 2  | chr2_222865364 | 222865364 | 2.69E-06 | 0.1695 | GRMZM2G154716    | China |
| qRT3-21 | 2  | chr2_229961991 | 229961991 | 1.58E-06 | 0.154  | GRMZM2G333448    | China |
| qRT3-22 | 3  | chr3_54193516  | 54193516  | 5.28E-06 | 0.1451 | GRMZM5G830319    | China |
| qRT3-23 | 3  | chr3_57167369  | 57167369  | 5.12E-06 | 0.1436 | GRMZM2G016754    | China |
| qRT3-24 | 3  | chr3_81038099  | 81038099  | 1.87E-06 | 0.1504 | GRMZM2G156033    | China |
| qRT3-25 | 3  | chr3_101087707 | 101087707 | 3.04E-06 | 0.1467 | GRMZM2G401179    | China |
| qRT3-26 | 3  | chr3_113948740 | 113948740 | 6.40E-06 | 0.1504 | AC230011.2_FG002 | China |
| qRT3-27 | 3  | chr3_197797519 | 197797519 | 3.92E-06 | 0.1414 | GRMZM2G043212    | China |
| qRT3-28 | 3  | chr3_198303954 | 198303954 | 2.89E-06 | 0.1478 | GRMZM2G141299    | China |
| qRT3-29 | 3  | chr3_210354275 | 210354275 | 7.81E-07 | 0.1802 | GRMZM2G437460    | China |
| qRT3-30 | 3  | chr3_224713856 | 224713856 | 4.18E-06 | 0.1413 | GRMZM2G034684    | China |
| qRT3-31 | 4  | chr4_2969678   | 2969678   | 2.91E-06 | 0.1758 | GRMZM2G469483    | China |
| qRT3-32 | 4  | chr4_11223788  | 11223788  | 3.32E-07 | 0.2017 | GRMZM2G068330    | China |
| qRT3-33 | 4  | chr4_23192577  | 23192577  | 6.39E-06 | 0.153  | GRMZM2G389937    | China |
| qRT3-34 | 4  | chr4_31532503  | 31532503  | 2.01E-07 | 0.2022 | GRMZM2G052670    | China |
| qRT3-35 | 4  | chr4_145549902 | 145549902 | 1.91E-06 | 0.1538 | AC205672.3_FG001 | China |
| qRT3-36 | 4  | chr4_177073590 | 177073590 | 5.09E-06 | 0.1523 | GRMZM2G006297    | China |
| qRT3-37 | 4  | chr4_228578491 | 228578491 | 2.91E-06 | 0.1475 | GRMZM2G044848    | China |
| qRT3-38 | 5  | chr5_92429962  | 92429962  | 4.56E-06 | 0.1405 | GRMZM2G179454    | China |
| qRT3-39 | 5  | chr5_200376352 | 200376352 | 3.72E-10 | 0.2835 | GRMZM2G035213    | China |
| qRT3-40 | 6  | chr6_34160278  | 34160278  | 2.28E-06 | 0.1668 | GRMZM2G147804    | China |
| qRT3-41 | 6  | chr6_80802049  | 80802049  | 2.50E-06 | 0.1577 | GRMZM2G017421    | China |
| qRT3-42 | 7  | chr7_54479667  | 54479667  | 4.30E-06 | 0.145  | GRMZM2G032766    | China |
| qRT3-43 | 7  | chr7_107374028 | 107374028 | 5.19E-06 | 0.1526 | No               | China |
| qRT3-44 | 8  | chr8_60106765  | 60106765  | 4.34E-06 | 0.1419 | GRMZM2G088291    | China |
| qRT3-45 | 8  | chr8_88681491  | 88681491  | 6.38E-06 | 0.1474 | GRMZM2G044531    | China |
| qRT3-46 | 8  | chr8_99084878  | 99084878  | 1.66E-06 | 0.1717 | GRMZM2G046824    | China |
| qRT3-47 | 8  | chr8_125477938 | 125477938 | 4.08E-06 | 0.1407 | GRMZM5G855411    | China |
| qRT3-48 | 9  | chr9_3901902   | 3901902   | 3.89E-06 | 0.1412 | GRMZM2G048243    | China |
| qRT3-49 | 9  | chr9_11330574  | 11330574  | 2.70E-06 | 0.1624 | GRMZM2G404855    | China |
| qRT3-50 | 9  | chr9_84233825  | 84233825  | 1.36E-06 | 0.1544 | GRMZM2G092256    | China |
| qRT3-51 | 9  | chr9_94815283  | 94815283  | 2.59E-06 | 0.1838 | GRMZM5G805627    | China |
| qRT3-52 | 9  | chr9_96620660  | 96620660  | 2.30E-06 | 0.1518 | GRMZM2G162623    | China |
| qRT3-53 | 9  | chr9_100954354 | 100954354 | 3.76E-06 | 0.1451 | AC226445.2_FG002 | China |
| qRT3-54 | 9  | chr9_103569663 | 103569663 | 3.16E-06 | 0.1466 | GRMZM2G010863    | China |
| qRT3-55 | 9  | chr9_138495501 | 138495501 | 5.68E-06 | 0.1592 | GRMZM2G145451    | China |
| qRT3-56 | 10 | chr10_47855681 | 47855681  | 5.27E-08 | 0.2002 | GRMZM2G570790    | China |

|              |                  |    |                |                         |                           |        |                                     |            |                           |
|--------------|------------------|----|----------------|-------------------------|---------------------------|--------|-------------------------------------|------------|---------------------------|
| <b>TT3</b>   | <i>qTT3-1</i>    | 7  | chr7 15499854  | 15499854                | 2.68E-06                  | 0.1486 | GRMZM2G179090                       | China      |                           |
| <b>ATLOG</b> | <i>qATLOG-1</i>  | 4  | rs131181045    | 36451477                | [-log <sub>10</sub> =4.5] | 10.14  | *                                   | Portugal   | (Alves et al., 2020)      |
|              | <i>qATLOG-2</i>  | 4  | rs129686170    | 44985143                | [-log <sub>10</sub> =4.2] | 10.00  | *                                   | Portugal   |                           |
|              | <i>qATLOG-3</i>  | 4  | rs129686172    | 44985307                | [-log <sub>10</sub> =4.2] | 10.00  | *                                   | Portugal   |                           |
|              | <i>qATLOG-4</i>  | 4  | rs129686173    | 44985374                | [-log <sub>10</sub> =4.2] | 10.00  | *                                   | Portugal   |                           |
|              | <i>qATLOG-5</i>  | 4  | rs129686175    | 44985417                | [-log <sub>10</sub> =4.2] | 10.00  | *                                   | Portugal   |                           |
|              | <i>qATLOG-6</i>  | 4  | rs129686679    | 45151080                | [-log <sub>10</sub> =4.2] | 10.00  | *                                   | Portugal   |                           |
|              | <i>qATLOG-7</i>  | 4  | rs131452300    | 45215363                | [-log <sub>10</sub> =4.2] | 10.00  | *                                   | Portugal   |                           |
|              | <i>qATLOG-8</i>  | 4  | rs129686902    | 45289528                | [-log <sub>10</sub> =4.2] | 10.00  | *                                   | Portugal   |                           |
|              | <i>qATLOG-9</i>  | 4  | rs131452316    | 45289828                | [-log <sub>10</sub> =4.2] | 10.00  | *                                   | Portugal   |                           |
|              | <i>qATLOG-10</i> | 5  | rs130180529    | 200420347               | [-log <sub>10</sub> =5.6] | 13.31  | *                                   | Portugal   |                           |
|              | <i>qATLOG-11</i> | 5  | rs130180536    | 200421939               | [-log <sub>10</sub> =5.6] | 13.31  | *                                   | Portugal   |                           |
|              | <i>qATLOG-12</i> | 5  | rs130200955_1  | 212731495               | [-log <sub>10</sub> =4.6] | 10.20  | *                                   | Portugal   |                           |
|              | <i>qATLOG-13</i> | 5  | rs130200955_2  | 212731495               | [-log <sub>10</sub> =4.6] | 10.20  | *                                   | Portugal   |                           |
|              | <i>qATLOG-14</i> | 10 | rs128647552    | 149506640               | [-log <sub>10</sub> =4.3] | 9.58   | *                                   | Portugal   |                           |
| <b>DTLOG</b> | <i>qDTLOG-1</i>  | 1  | rs128990610    | 298814922               | [-log <sub>10</sub> =5.9] | 19.67  | *                                   | Portugal   |                           |
|              | <i>qDTLOG-2</i>  | 1  | rs128990610    | 298814922               | [-log <sub>10</sub> =4.6] | 13.37  | *                                   | Portugal   |                           |
|              | <i>qDTLOG-3</i>  | 1  | rs128990613    | 298815104               | [-log <sub>10</sub> =5.9] | 19.67  | *                                   | Portugal   |                           |
|              | <i>qDTLOG-4</i>  | 1  | rs128990613    | 298815104               | [-log <sub>10</sub> =4.6] | 13.37  | *                                   | Portugal   |                           |
|              | <i>qDTLOG-5</i>  | 2  | rs131335950    | 41312594                | [-log <sub>10</sub> =4.4] | 12.81  | *                                   | Portugal   |                           |
|              | <i>qDTLOG-6</i>  | 2  | rs129211723    | 204555793               | [-log <sub>10</sub> =4.1] | 12.14  | *                                   | Portugal   |                           |
|              | <i>qDTLOG-7</i>  | 3  | rs131178368    | 17449753                | [-log <sub>10</sub> =5.7] | 13.75  | *                                   | Portugal   |                           |
|              | <i>qDTLOG-8</i>  | 3  | rs131178368    | 17449753                | [-log <sub>10</sub> =4.1] | 12.21  | *                                   | Portugal   |                           |
|              | <i>qDTLOG-9</i>  | 3  | rs129286980    | 170499908               | [-log <sub>10</sub> =5.4] | 12.60  | *                                   | Portugal   |                           |
|              | <i>qDTLOG-10</i> | 3  | rs129286980    | 170499908               | [-log <sub>10</sub> =4.6] | 12.87  | *                                   | Portugal   |                           |
|              | <i>qDTLOG-11</i> | 4  | rs129619500    | 2985173                 | [-log <sub>10</sub> =4.0] | 13.48  | *                                   | Portugal   |                           |
|              | <i>qDTLOG-12</i> | 4  | rs131462576    | 71242320                | [-log <sub>10</sub> =4.0] | 10.26  | *                                   | Portugal   |                           |
|              | <i>qDTLOG-13</i> | 5  | rs131510695    | 33437545                | [-log <sub>10</sub> =4.0] | 11.98  | *                                   | Portugal   |                           |
|              | <i>qDTLOG-14</i> | 6  | rs131553173    | 22002210                | [-log <sub>10</sub> =4.2] | 11.44  | *                                   | Portugal   |                           |
|              | <i>qDTLOG-15</i> | 6  | rs131568062    | 59267250                | [-log <sub>10</sub> =4.6] | 14.10  | *                                   | Portugal   |                           |
|              | <i>qDTLOG-16</i> | 6  | rs131568326    | 60040082                | [-log <sub>10</sub> =5.2] | 16.20  | *                                   | Portugal   |                           |
|              | <i>qDTLOG-17</i> | 6  | rs131568350    | 60174784                | [-log <sub>10</sub> =5.3] | 18.31  | *                                   | Portugal   |                           |
|              | <i>qDTLOG-18</i> | 7  | rs131179571    | 135606083               | [-log <sub>10</sub> =4.2] | 15.45  | *                                   | Portugal   |                           |
|              | <i>qDTLOG-19</i> | 7  | rs131181519    | 157314622               | [-log <sub>10</sub> =4.1] | 13.09  | *                                   | Portugal   |                           |
| <b>GT</b>    | <i>qGT-1</i>     | 1  | rs131269931    | 82014738                | [-log <sub>10</sub> =4.3] | 9.50   | *                                   | Portugal   |                           |
|              | <i>qGT-2</i>     | 1  | rs128653362    | 82031110                | [-log <sub>10</sub> =4.0] | 8.54   | *                                   | Portugal   |                           |
|              | <i>qGT-3</i>     | 1  | rs131280450    | 101025418               | [-log <sub>10</sub> =4.1] | 7.22   | *                                   | Portugal   |                           |
|              | <i>qGT-4</i>     | 4  | rs129940387    | 225448671               | [-log <sub>10</sub> =4.2] | 7.80   | *                                   | Portugal   |                           |
|              | <i>qGT-5</i>     | 8  | rs131179677    | 26077645                | [-log <sub>10</sub> =4.8] | 9.27   | *                                   | Portugal   |                           |
| <b>δT</b>    | <i>qδT</i>       | 1  | Zm00001d028680 | 2,788,600-42,791,622    | 2.625E-06                 | *      | Ankyrin repeat-containing protein   | Aurora, NY | Hershberger et al. (2022) |
| <b>γT</b>    | <i>qγT</i>       | 1  | Zm00001d028680 | 42,788,600-42,791,622   | 5.774E-06                 | *      | Ankyrin repeat-containing protein   | Aurora, NY |                           |
| <b>ΣT</b>    | <i>qΣT</i>       | 1  | Zm00001d028680 | 42,788,600-42,791,622   | 1.968E-05                 | *      | Ankyrin repeat-containing protein   | Aurora, NY |                           |
| <b>γT</b>    | <i>qγT</i>       | 1  | Zm00001d034433 | 292,905,093-292,912,832 | 1.804E-05                 | *      | Heat stress transcription factor 11 | Aurora, NY |                           |
| <b>ΣT</b>    | <i>qΣT</i>       | 1  | Zm00001d034433 | 292,905,093-292,912,832 | 2.045E-05                 | *      | Heat stress transcription factor 11 | Aurora, NY |                           |
| <b>ΣT</b>    | <i>qΣT</i>       | 2  | Zm00001d007121 | 222,781,921-222,806,658 | 2.388E-07                 | *      | CW-type Zinc Finger                 | Aurora, NY |                           |
| <b>γT</b>    | <i>qγT</i>       | 2  | Zm00001d007121 | 222,781,921-222,806,658 | 7.702E-07                 | *      | CW-type Zinc Finger                 | Aurora, NY |                           |



|                                |                                 |   |                |                         |           |   |                                                        |            |
|--------------------------------|---------------------------------|---|----------------|-------------------------|-----------|---|--------------------------------------------------------|------------|
| $\Sigma T3$                    | $q\Sigma T3$                    | 2 | Zm00001d007489 | 232,843,576-232,847,278 | 8.183E-07 | * | Zinc-finger domain of monoamine-oxidase A repressor R1 | Aurora, NY |
| $\Sigma T$                     | $q\Sigma T$                     | 3 | Zm00001d040089 | 27,065,943-27,068,338   | 1.975E-05 | * | Nodulin MtN21 /EamA-like transporter family protein    | Aurora, NY |
| $\Sigma T3$                    | $q\Sigma T3$                    | 3 | Zm00001d042231 | 156,958,516-156,959,137 | 2.572E-06 | * | Basal endosperm transfer layer10                       | Aurora, NY |
| $\Sigma T3$                    | $q\Sigma T3$                    | 3 | Zm00001d043479 | 201,465,990-201,469,783 | 6.036E-06 | * | Coiled-coil domain-containing protein 25               | Aurora, NY |
| $\alpha T$                     | $q\alpha T$                     | 4 | Zm00001d049809 | 45,664,408-45,668,447   | 3.294E-06 | * | *                                                      | Aurora, NY |
| $\gamma T$                     | $q\gamma T$                     | 4 | Zm00001d053899 | 243,343,911-243,347,704 | 1.066E-05 | * | Rho-related protein from plants2                       | Aurora, NY |
| $\alpha T/\gamma T$            | $q(\alpha T/\gamma T)$          | 5 | Zm00001d017746 | 205,825,586-205,829,216 | 1.133E-15 | * | Vitamin E synthesis4                                   | Aurora, NY |
| $\gamma T/(\gamma T+\alpha T)$ | $q\gamma T/(\gamma T+\alpha T)$ | 5 | Zm00001d017746 | 205,825,586-205,829,216 | 3.105E-15 | * | Vitamin E synthesis4                                   | Aurora, NY |
| $\alpha T$                     | $q\alpha T$                     | 5 | Zm00001d017746 | 205,825,586-205,829,216 | 3.100E-11 | * | Vitamin E synthesis4                                   | Aurora, NY |
| $\delta T/\alpha T$            | $q(\delta T/\alpha T)$          | 5 | Zm00001d017746 | 205,825,586-205,829,216 | 3.030E-08 | * | Vitamin E synthesis4                                   | Aurora, NY |
| $\gamma T$                     | $q\gamma T$                     | 5 | Zm00001d017746 | 205,825,586-205,829,216 | 3.847E-08 | * | Vitamin E synthesis4                                   | Aurora, NY |
| $\gamma T$                     | $q\gamma T$                     | 5 | Zm00001d018086 | 213,976,676-213,977,392 | 1.329E-05 | * | *                                                      | Aurora, NY |
| $\Sigma T$                     | $q\Sigma T$                     | 6 | Zm00001d036727 | 99,181,767-99,186,018   | 2.166E-05 | * | Alpha/beta-Hydrolases superfamily protein              | Aurora, NY |
| $\Sigma T$                     | $q\Sigma T$                     | 6 | Zm00001d038608 | 160,896,290-160,898,350 | 9.560E-06 | * | Class VI heat shock protein                            | Aurora, NY |
| $\Sigma T3+\Sigma T$           | $q(\Sigma T3+\Sigma T)$         | 6 | Zm00001d039066 | 169,497,057-169,501,065 | 4.789E-07 | * | Galactose mutarotase-like superfamily protein          | Aurora, NY |
| $\Sigma T$                     | $q\Sigma T$                     | 4 | Zm00001d011365 | 148,696,781-148,699,784 | 1.03E-05  | * | Alpha/beta-Hydrolases superfamily protein              | Aurora, NY |
| $\Sigma T$                     | $q\Sigma T$                     | 5 | Zm00001d011825 | 162,158,586-162,160,692 | 1.71E-05  | * | Probable gamma-secretase subunit PEN-2                 | Aurora, NY |
| $\Sigma T$                     | $q\Sigma T$                     | 2 | Zm00001d011923 | 164,678,915-164,684,859 | 3.01E-06  | * | TNF receptor-associated factor 26                      | Aurora, NY |
| $\gamma T$                     | $q\gamma T$                     | 4 | Zm00001d011923 | 164,678,915-164,684,859 | 1.01E-05  | * | TNF receptor-associated factor 26                      | Aurora, NY |

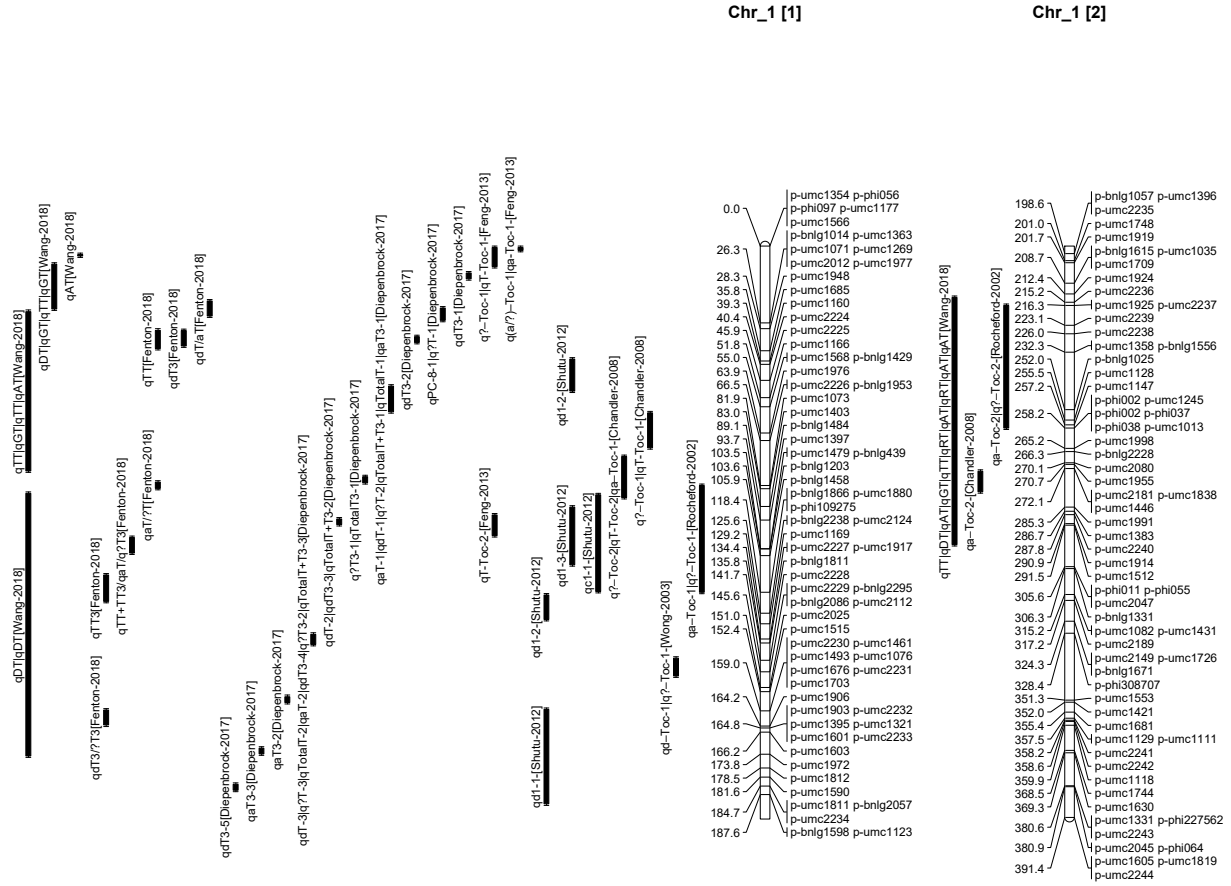

**Figure S1.** Chromosome locations of QTL that control seed  $\alpha$ -tocopherol ( $\alpha$ -Toc),  $\gamma$ -tocopherol ( $\gamma$ -Toc),  $\delta$ -tocopherol ( $\delta$ -Toc), total tocopherol (T-Toc) contents and ( $\alpha/\gamma$ )-Toc ratio in maize from 2002 to 2022.

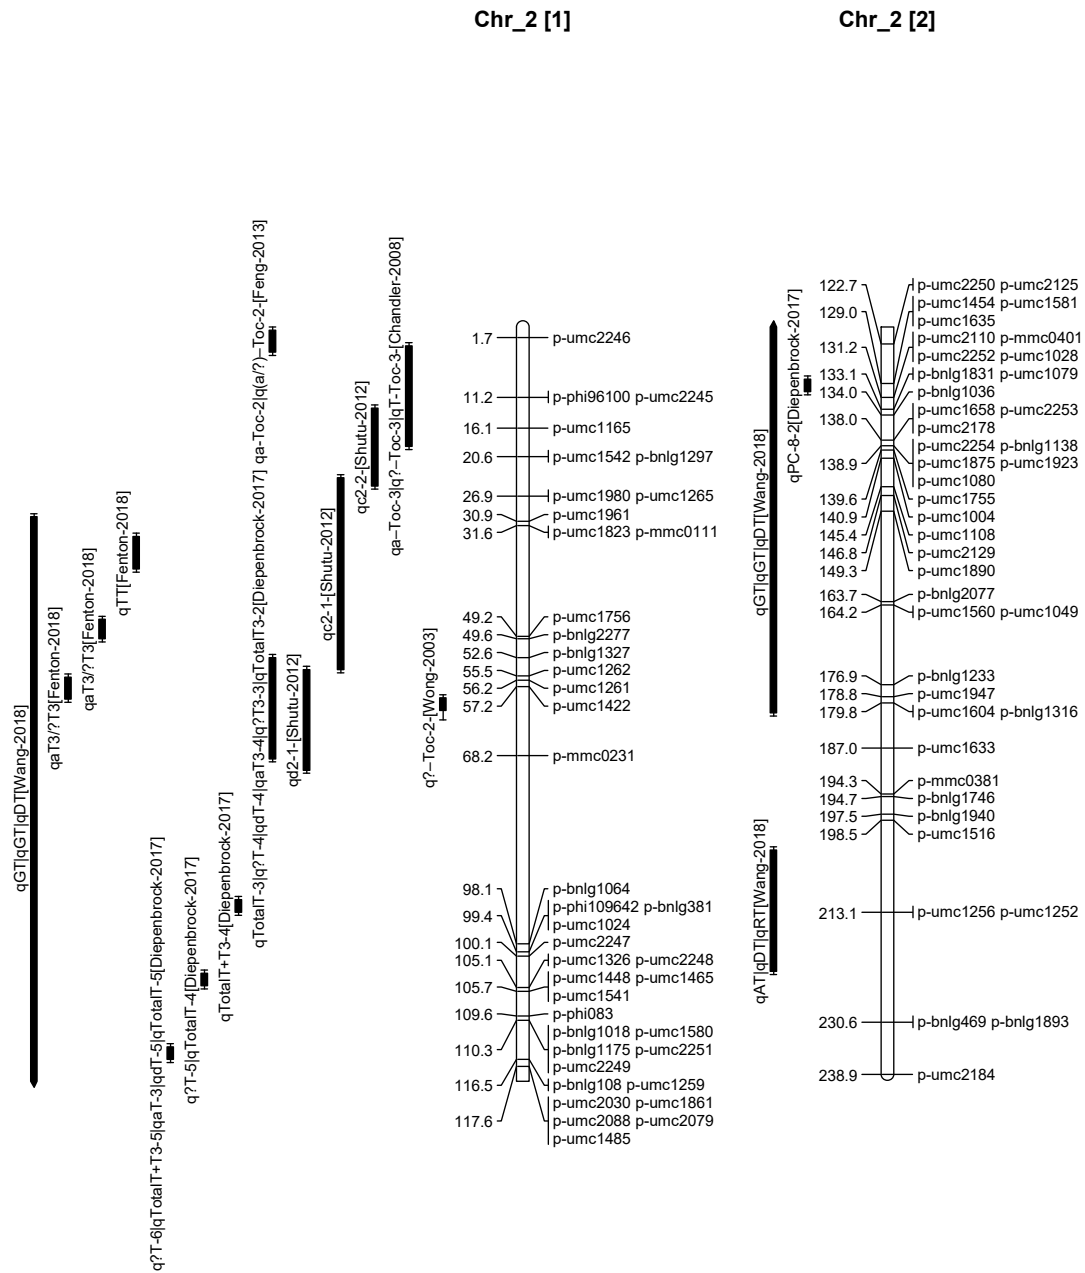

**Figure S1. Continued.**

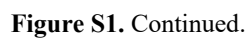

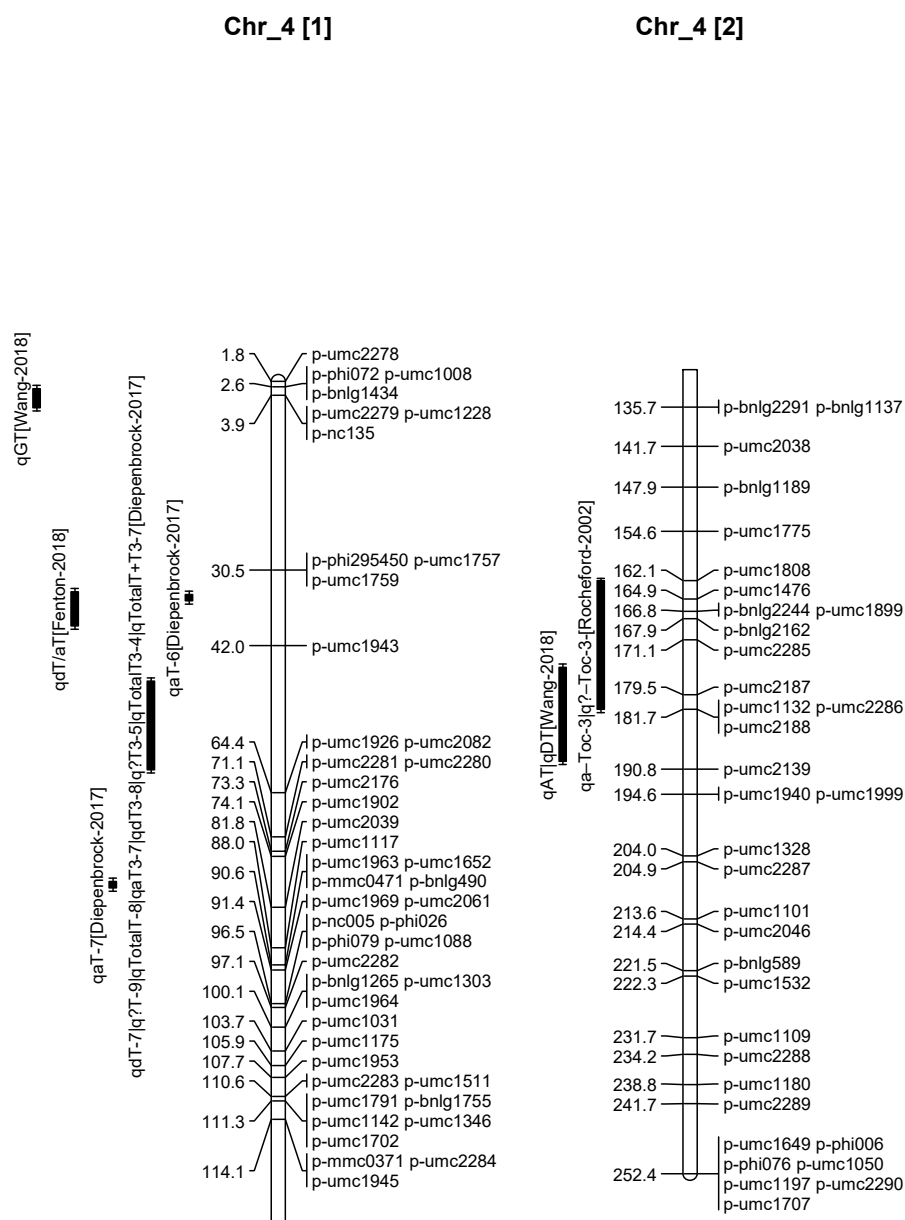

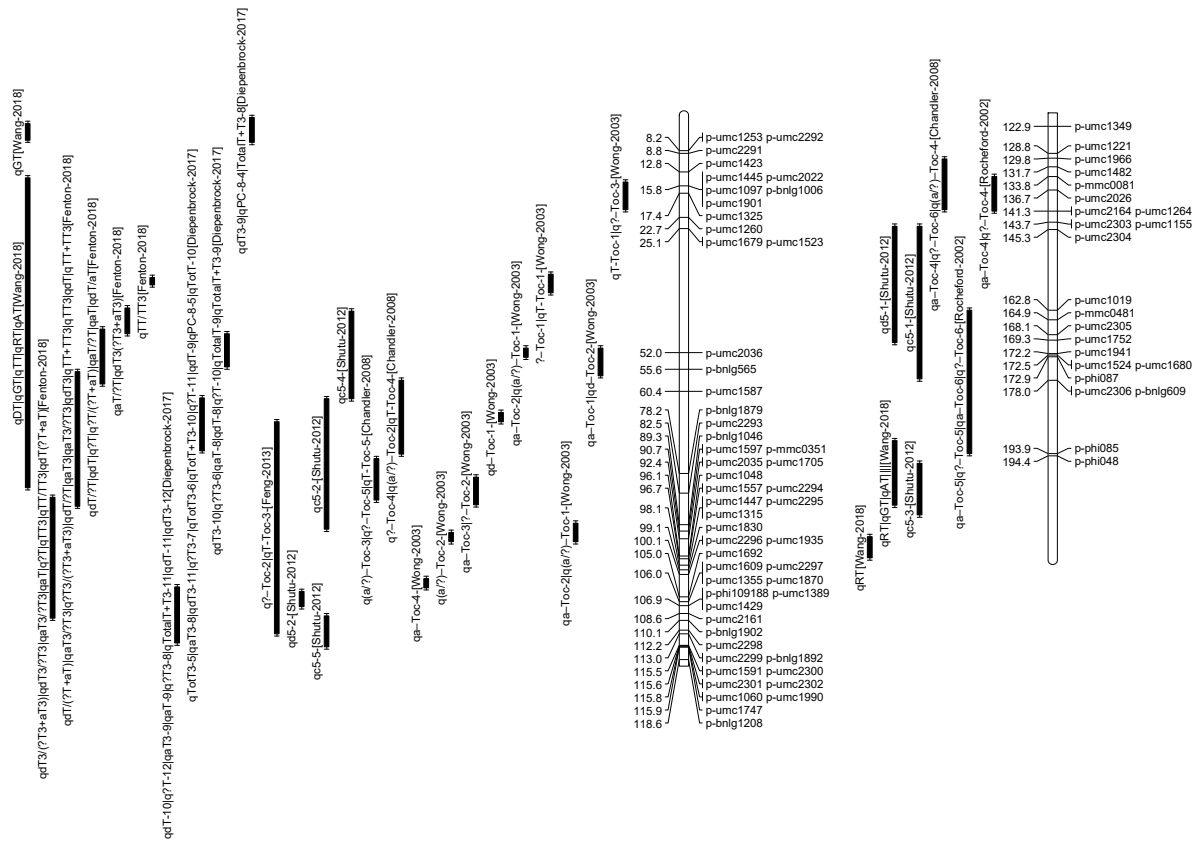

Figure S1. Continued.







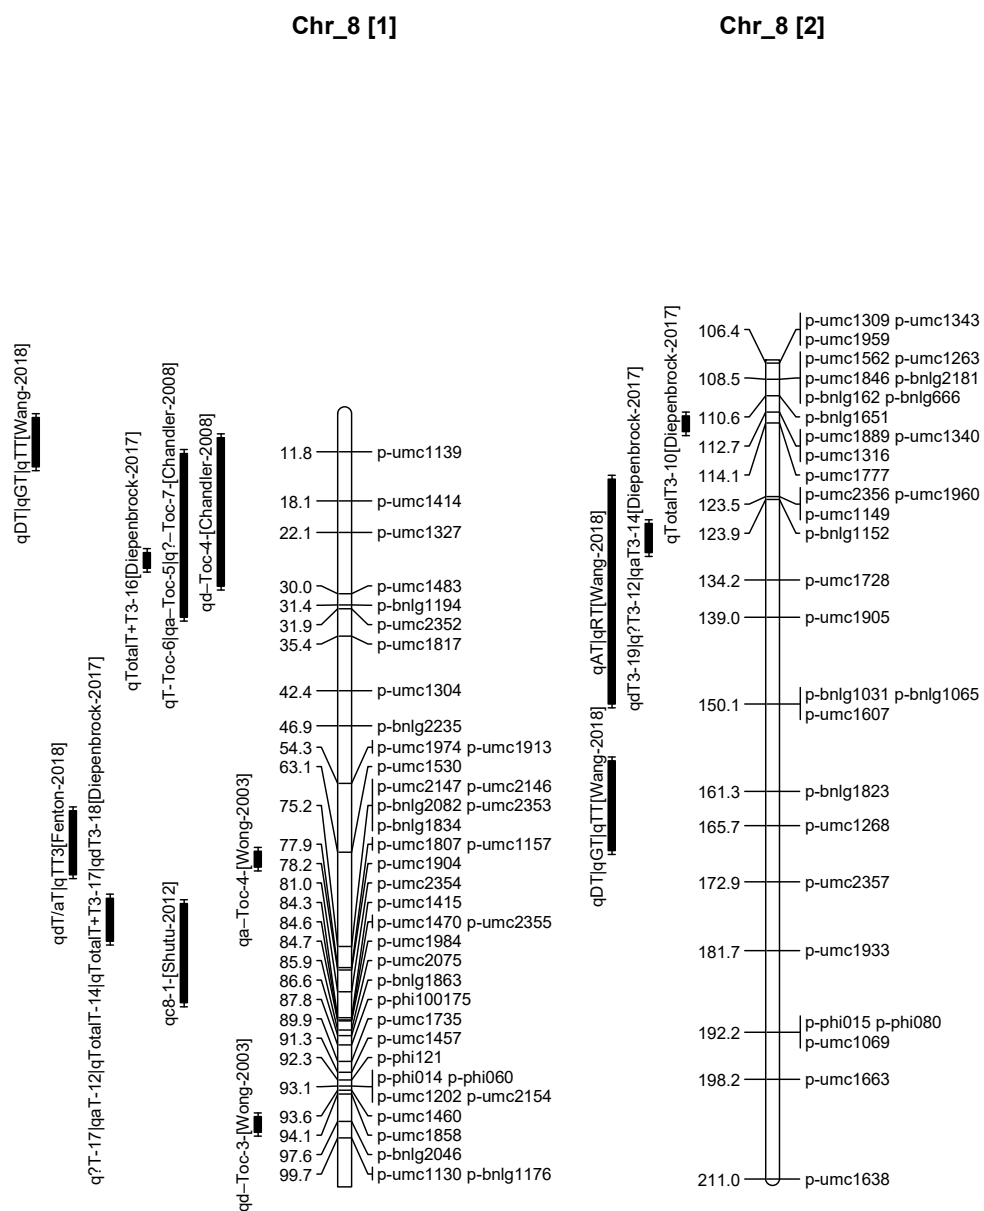

Figure S1. Continued.

**Chr\_9**

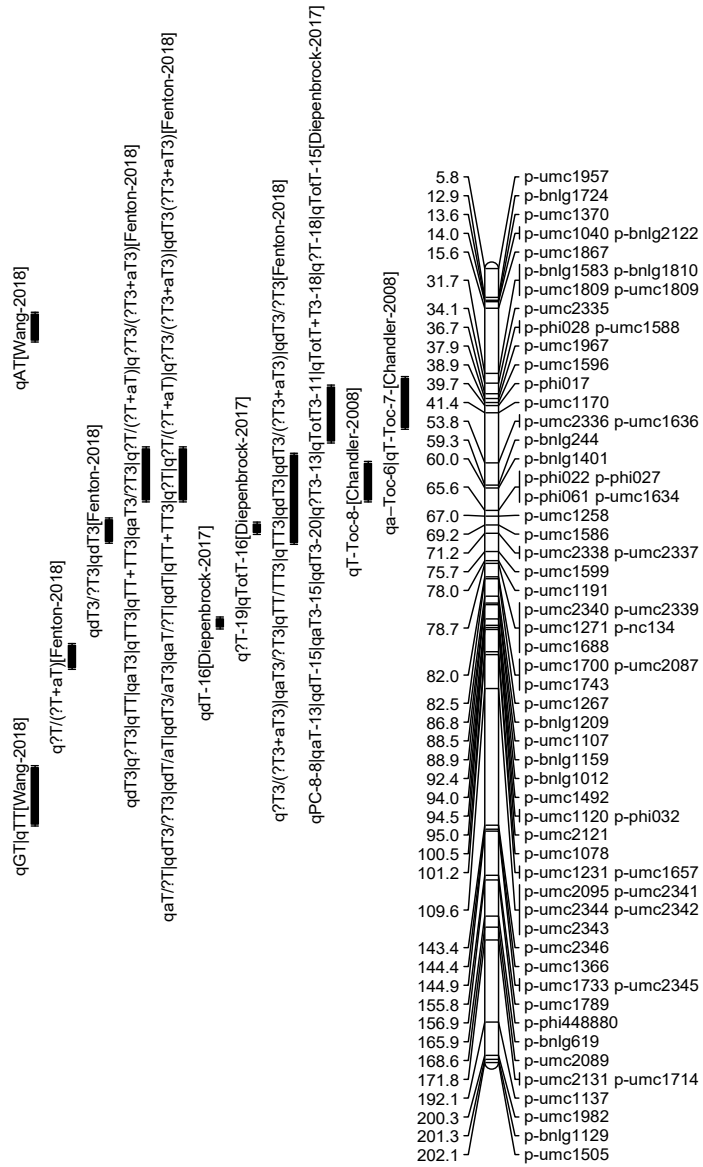

**Figure S1. Continued.**

**Chr\_10**

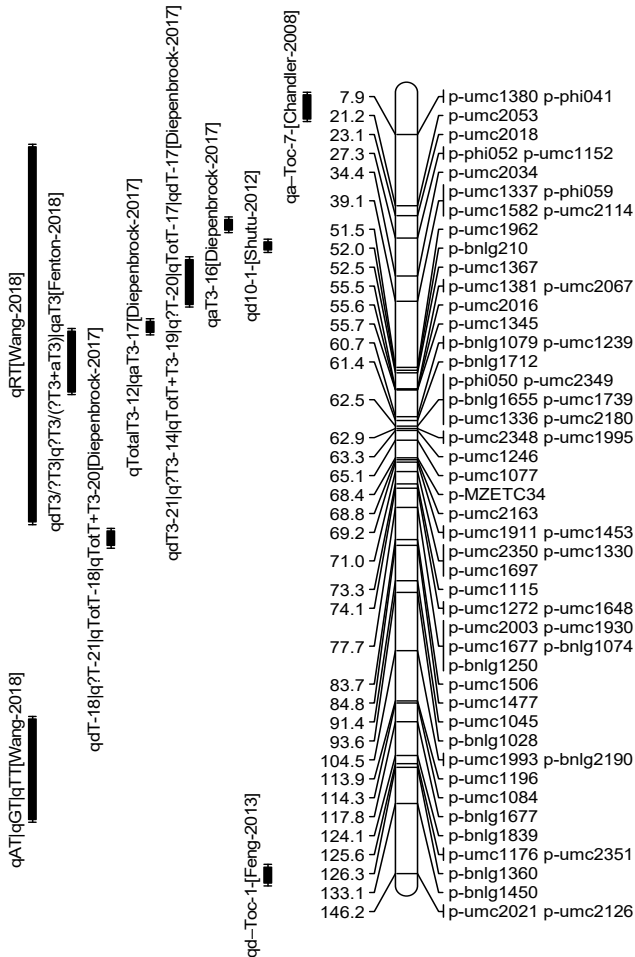

**Figure S1. Continued.**
